# Supplementary material for: A Multivariable Mendelian Randomization Analysis Disentangling The Causal Relations Between Abdominal Obesity, Non-Alcoholic Fatty Liver Disease and Cardiometabolic Diseases
Source: Research Square preprint supplement (doi:10.21203/rs.3.rs-1336425/v1), 2022-02-22
Supplement: Supplementary file 1 [file 3af74ac7826b67f8b96d60f3.docx]

**Supplementary Materials**

**
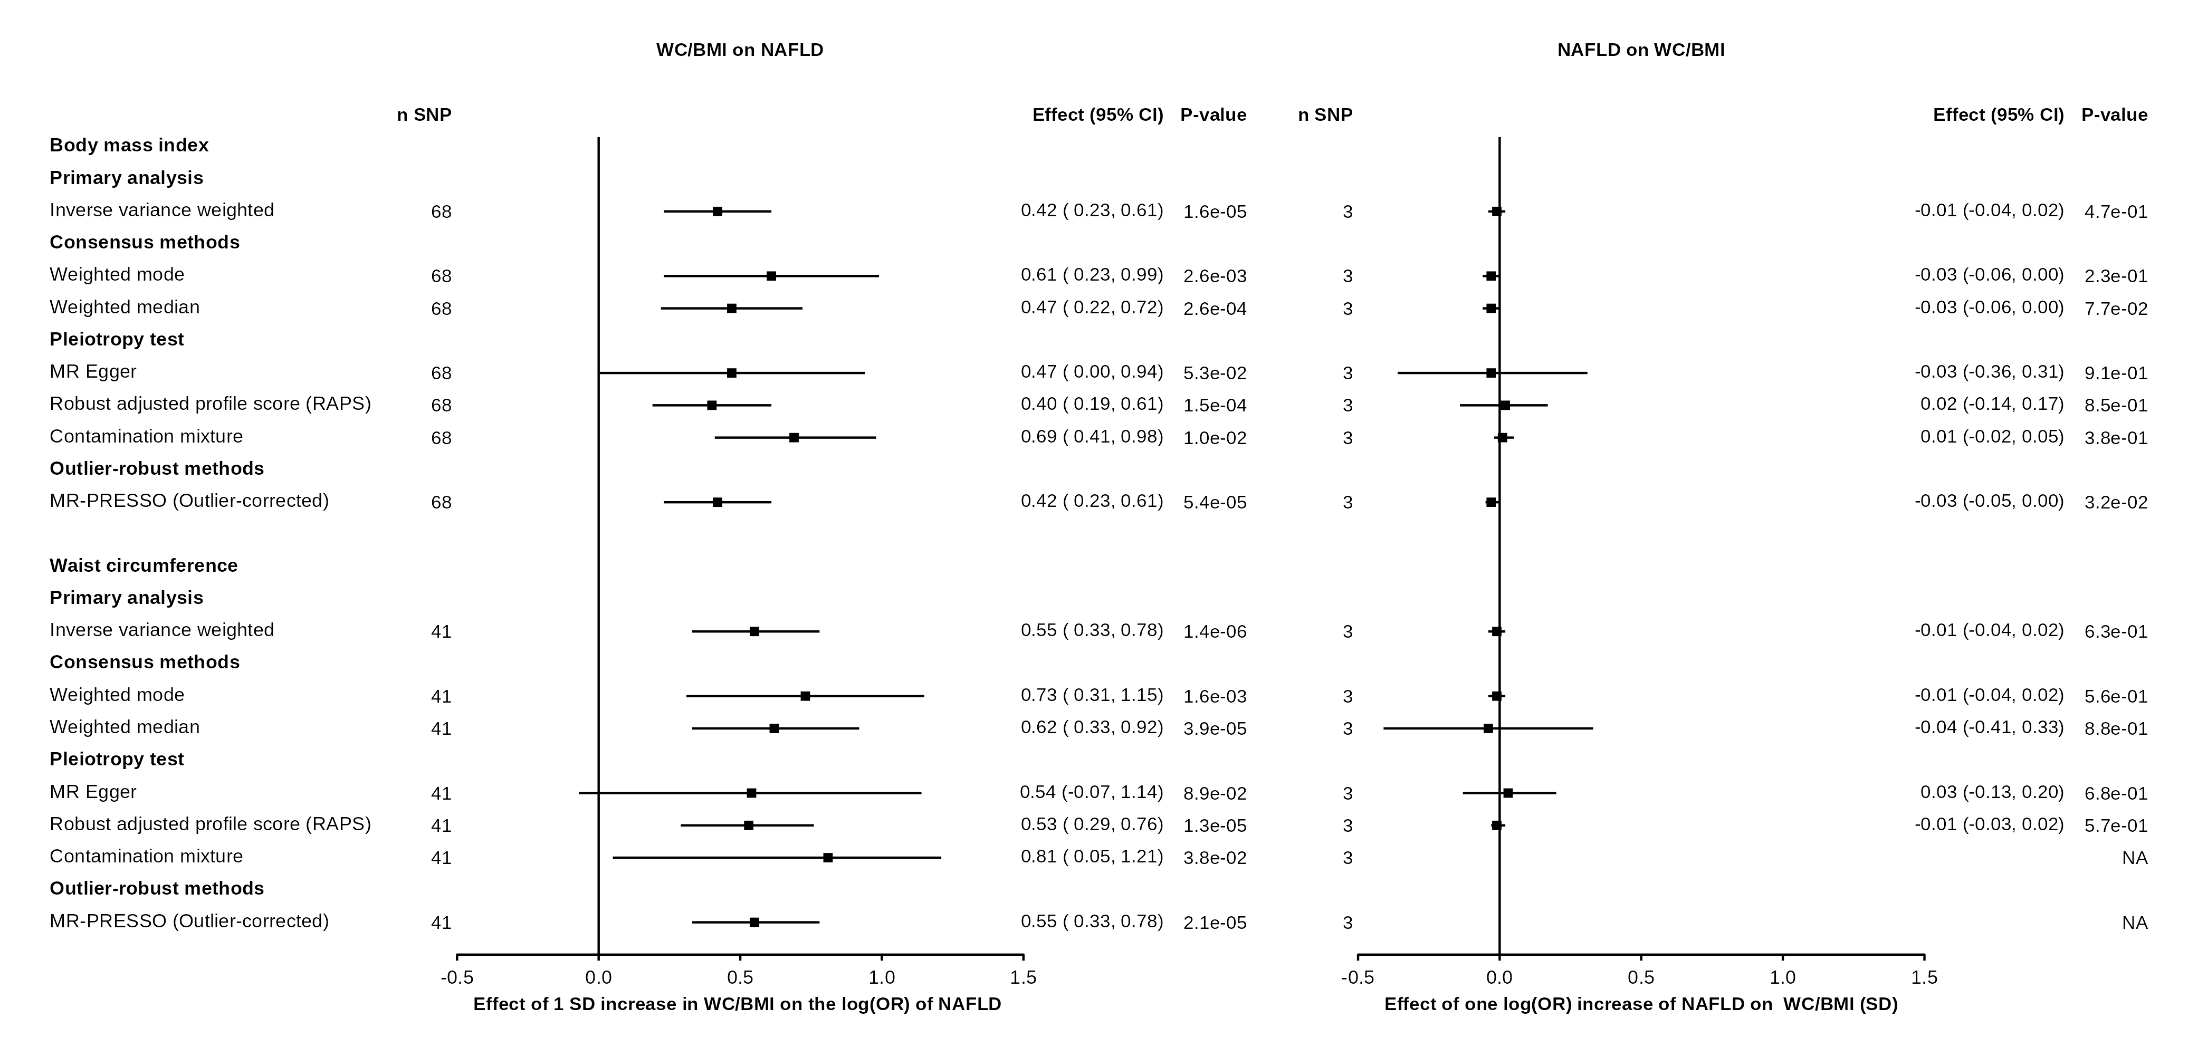
**

**Supplementary Figure 1. Bi-directional associations between obesity from GIANT and non-alcoholic fatty liver disease (NAFLD).** A) association between obesity and body fat distribution indices (exposures) and NAFLD (outcome) using inverse-variance weighted Mendelian randomization (IVW-MR) and all sensitivity analysis B) association NAFLD (exposure) and obesity and body fat distribution indices (outcomes) using IVW-MR.

**
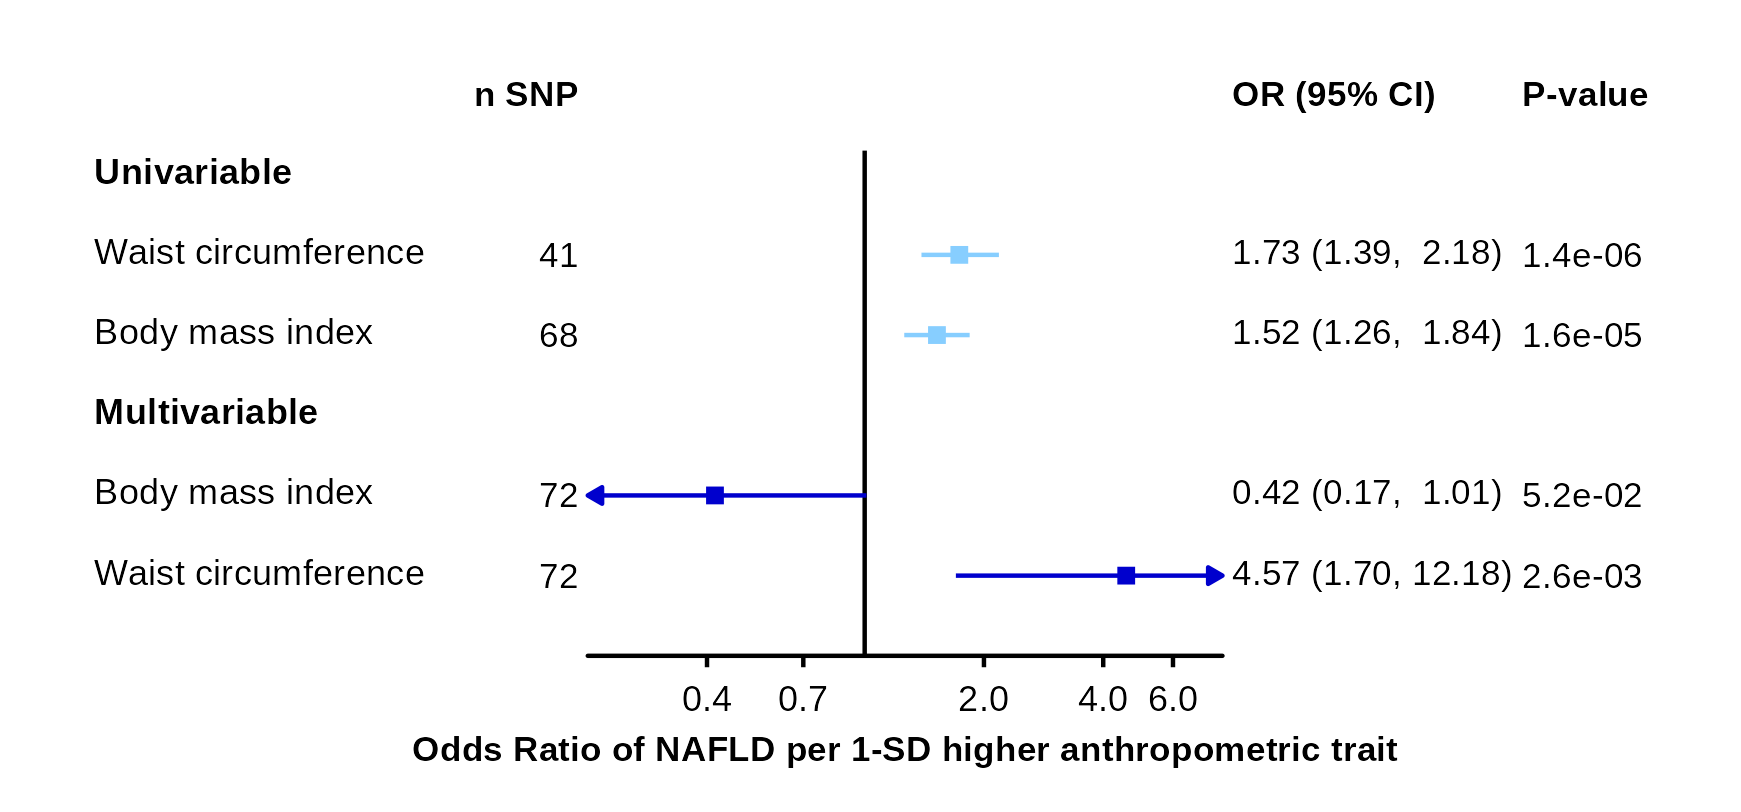
**

# Supplementary Figure 2. Association between waist circumference and body mass index from GIANT with non-alcoholic fatty liver disease using multivariable Mendelian randomization.

**
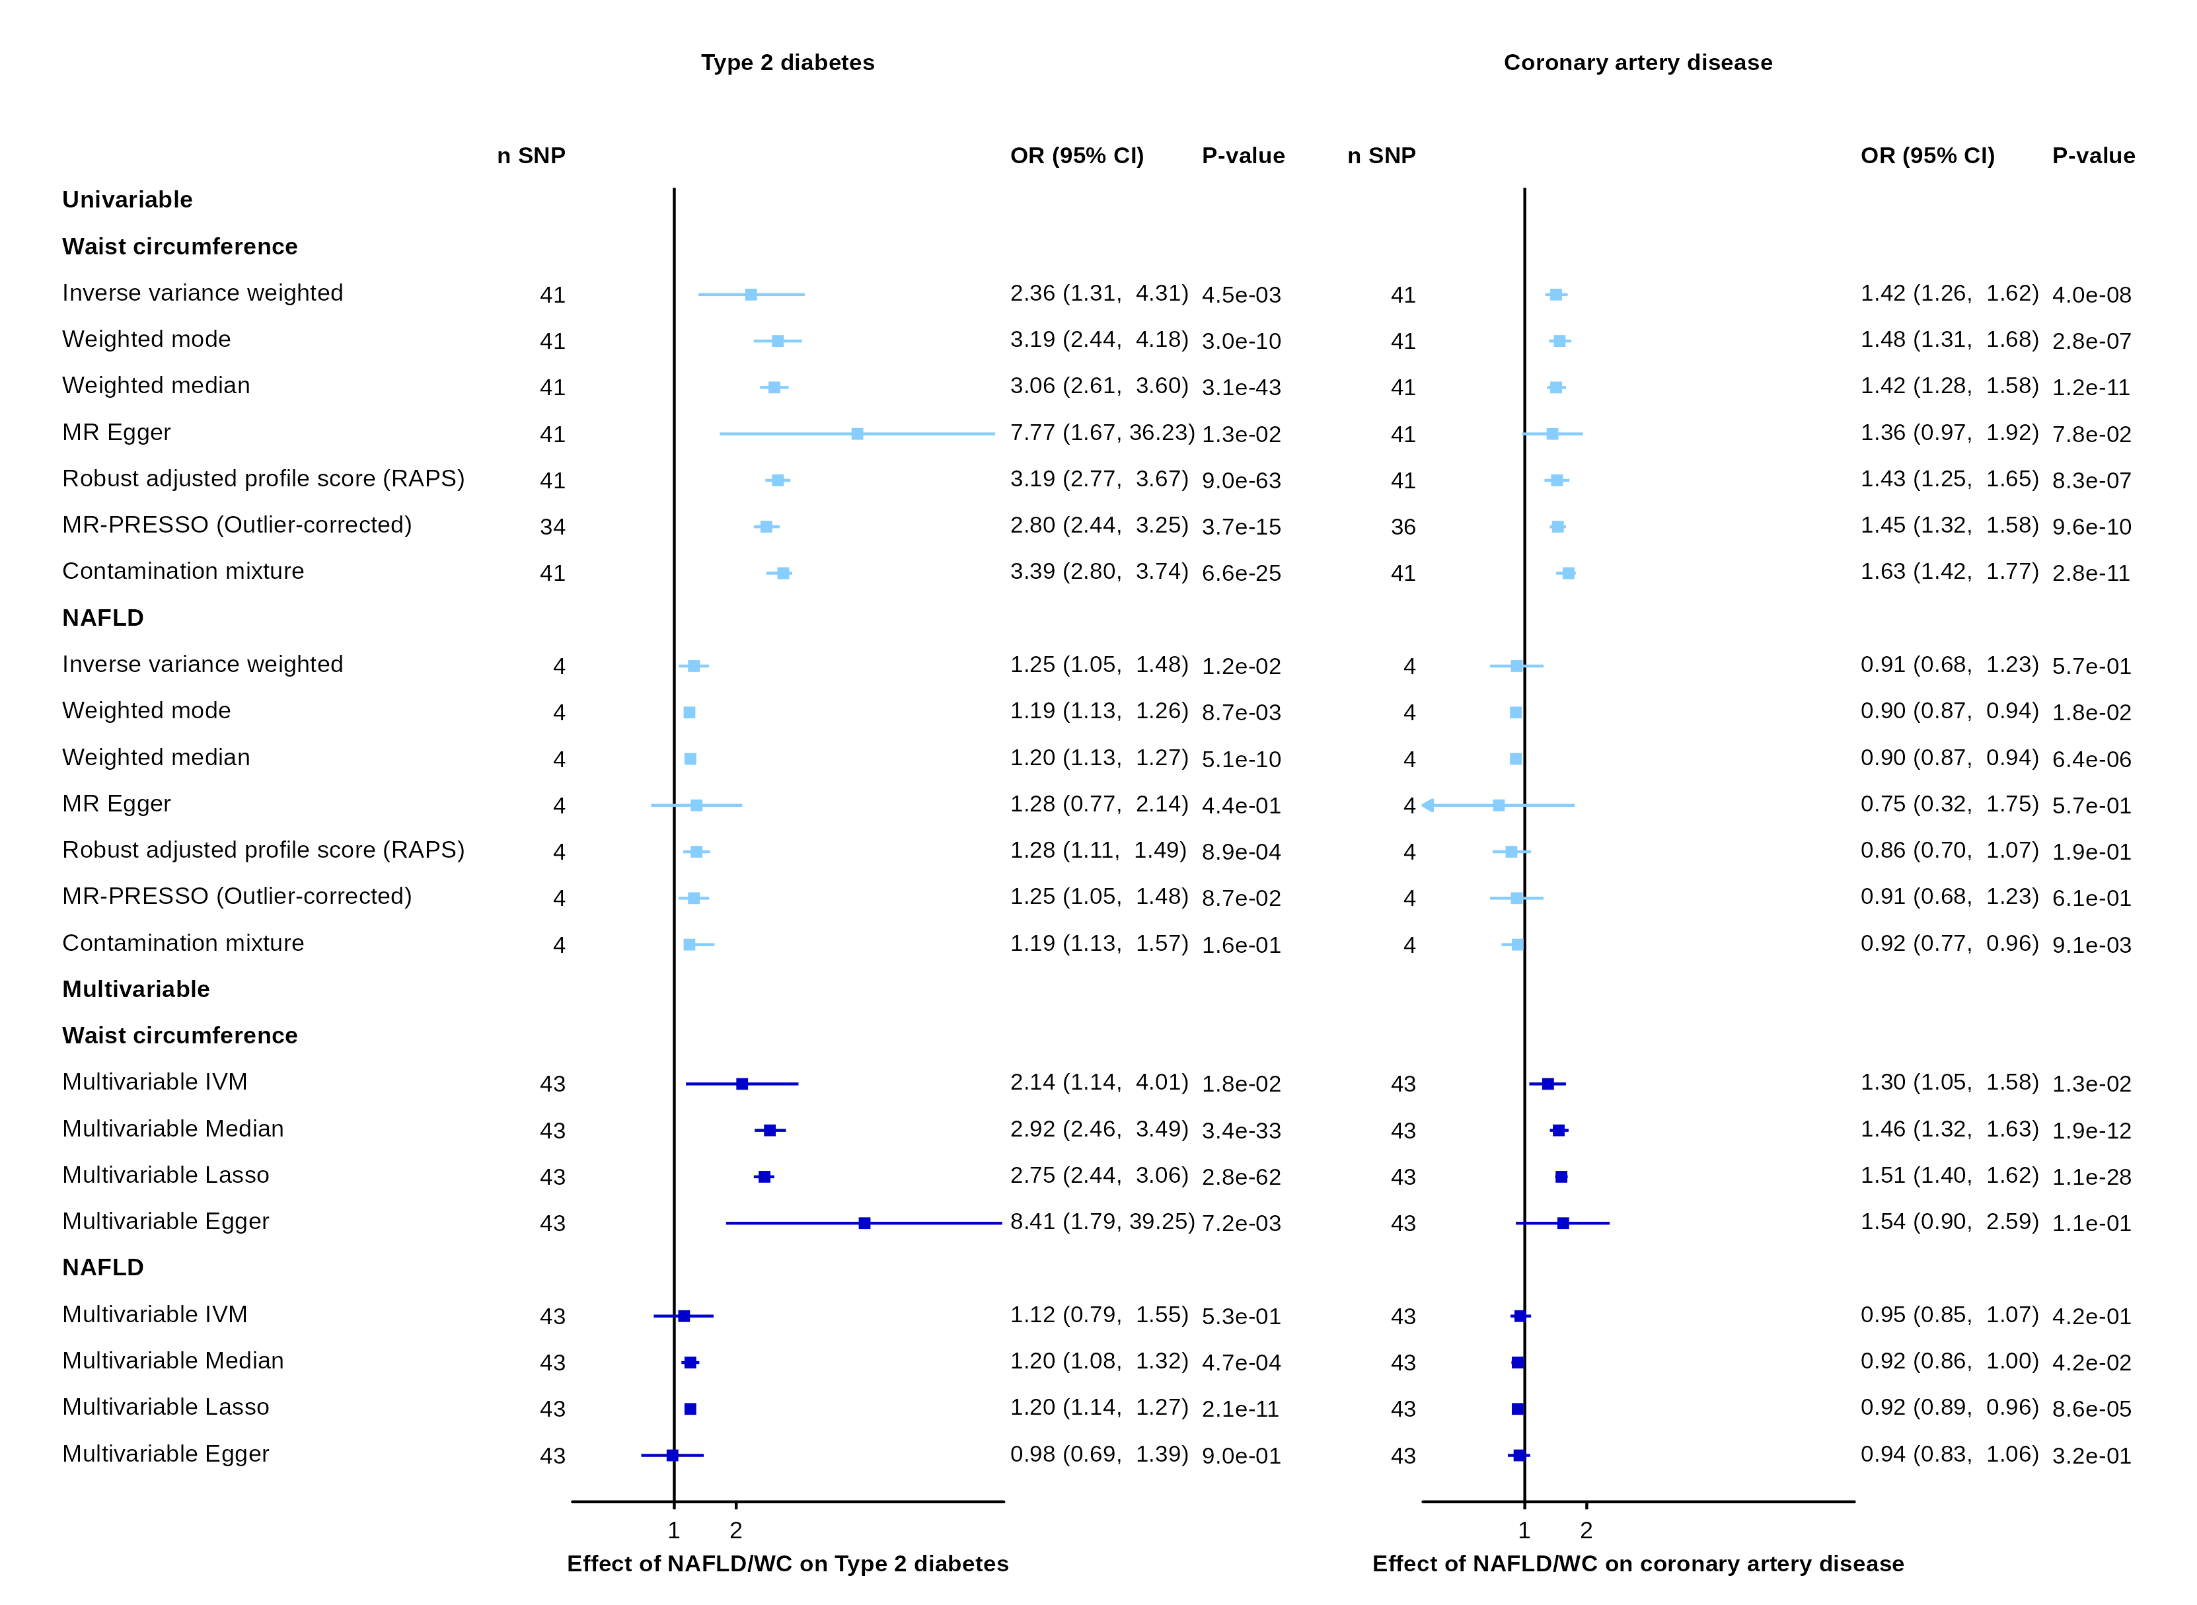
**

**Supplementary Figure 4. Association between waist circumference from GIANT and coronary artery disease and type 2 diabetes before and after accounting for non-alcoholic fatty liver disease using univariable and multivariable Mendelian randomization.**
