# Supplementary material for: A Multivariable Mendelian Randomization Analysis Disentangling The Causal Relations Between Abdominal Obesity, Non-Alcoholic Fatty Liver Disease and Cardiometabolic Diseases
Source: Research Square preprint supplement (doi:10.21203/rs.3.rs-1336425/v1), 2022-02-22
Supplement: Supplementary file 2 [file d379baaa024f8c8c416fbb2f.xlsx]

## Sheet: sup tab1. Datasets used
trait	group_name	year	author	consortium	sex	population	unit	nsnp	sample_size	pmid
Body mass index (BMI)	public	2018	Ben Elsworth	MRC-IEU	Males and Females	European	SD	9851867	461460
Waist circumference	public	2018	Ben Elsworth	MRC-IEU	Males and Females	European	SD	9851867	462166
Coronary heart disease	public	2015	Nikpay	CARDIoGRAMplusC4D	Males and Females	Mixed	log odds	9455779	184305	26343387
Body mass index	public	2015	Locke AE	GIANT	Males and Females	European	SD (kg/m^2)	2554668	322154	25673413
Waist circumference	public	2015	Shungin D	GIANT	Males and Females	European	SD (cm)	2565408	232101	25673412
NAFLD	Labo Arsenault	2021	Godsian, N	eMERGE, FinnGen, UK Biobank, and Estonian Biobank	Males and Females	European	log odds	6797898	778614	34841290
Mahajan_Type2diabetes		2018	Mahajan	DIAGRAM and UKBiobank	Males and Females	European	log odds	15745626	898130	30297969
van_der_Harst_CAD		2018	van der Harst, Pim	CARDIoGRAMplusC4D and UKB	Males and Females	European	log odds	7917813	547261	29212778
Scott_Type2Diabetes	public	2017	Scott RA	DIAGRAMM	Males and Females	European	log odds	11456567	158186	28566273

## Sheet: sup tab2. MVMR results
exposure	outcome	b	se	lci	uci	pval	cochranQ	cochranQpval	nsnp	method	clump_exposure	exposure_outcome_analyzed
BMI_UKB	NAFLD	-0.143518	0.237123	-0.60827	0.321235	0.545016	590.753	1.74484e-05	457	Multivariable IVM	none	WC_UKB-and-BMI_UKB-on-NAFLD
WC_UKB	NAFLD	0.855638	0.298327	0.270927	1.44035	0.0041292	590.753	1.74484e-05	457	Multivariable IVM	none	WC_UKB-and-BMI_UKB-on-NAFLD
BMI_UKB	NAFLD	-0.064814	0.291745	-0.636623	0.506995	0.824189			457	Multivariable Median	none	WC_UKB-and-BMI_UKB-on-NAFLD
WC_UKB	NAFLD	0.762068	0.366334	0.044068	1.48007	0.0375018			457	Multivariable Median	none	WC_UKB-and-BMI_UKB-on-NAFLD
BMI_UKB	NAFLD	-0.0190648	0.227725	-0.465398	0.427269	0.93328			457	Multivariable Lasso	none	WC_UKB-and-BMI_UKB-on-NAFLD
WC_UKB	NAFLD	0.712034	0.287466	0.148611	1.27546	0.0132517			457	Multivariable Lasso	none	WC_UKB-and-BMI_UKB-on-NAFLD
BMI_UKB	NAFLD	-0.124402	0.259065	-0.632161	0.383357	0.631088	590.709	1.52693e-05	457	Multivariable Egger	none	WC_UKB-and-BMI_UKB-on-NAFLD
WC_UKB	NAFLD	0.863559	0.301724	0.27219	1.45493	0.00420871	590.709	1.52693e-05	457	Multivariable Egger	none	WC_UKB-and-BMI_UKB-on-NAFLD
BMI_UKB	NAFLD	-0.000482288	0.00261814	-0.00561375	0.00464917	0.853849			457	Multivariable Egger Intercept	none	WC_UKB-and-BMI_UKB-on-NAFLD
WC_UKB	NAFLD	-0.000482288	0.00261814	-0.00561375	0.00464917	0.853849			457	Multivariable Egger Intercept	none	WC_UKB-and-BMI_UKB-on-NAFLD
BMI_UKB	NAFLD	0.229932	0.230135	-0.221124	0.680987	0.317737	526.501	0.00152292	436	Multivariable IVM	WC_UKB	WC_UKB-and-BMI_UKB-on-NAFLD
WC_UKB	NAFLD	0.41878	0.270097	-0.1106	0.94816	0.121026	526.501	0.00152292	436	Multivariable IVM	WC_UKB	WC_UKB-and-BMI_UKB-on-NAFLD
BMI_UKB	NAFLD	0.19927	0.29605	-0.380977	0.779517	0.500886			436	Multivariable Median	WC_UKB	WC_UKB-and-BMI_UKB-on-NAFLD
WC_UKB	NAFLD	0.519964	0.345388	-0.156984	1.19691	0.132209			436	Multivariable Median	WC_UKB	WC_UKB-and-BMI_UKB-on-NAFLD
BMI_UKB	NAFLD	0.484216	0.219058	0.0548705	0.913561	0.0270741			436	Multivariable Lasso	WC_UKB	WC_UKB-and-BMI_UKB-on-NAFLD
WC_UKB	NAFLD	0.113728	0.257665	-0.391285	0.618742	0.658937			436	Multivariable Lasso	WC_UKB	WC_UKB-and-BMI_UKB-on-NAFLD
BMI_UKB	NAFLD	0.190281	0.242391	-0.284796	0.665359	0.432442	526.166	0.00141348	436	Multivariable Egger	WC_UKB	WC_UKB-and-BMI_UKB-on-NAFLD
WC_UKB	NAFLD	0.38292	0.278817	-0.163552	0.929391	0.169636	526.166	0.00141348	436	Multivariable Egger	WC_UKB	WC_UKB-and-BMI_UKB-on-NAFLD
BMI_UKB	NAFLD	0.00129679	0.00246983	-0.00354399	0.00613758	0.599546			436	Multivariable Egger Intercept	WC_UKB	WC_UKB-and-BMI_UKB-on-NAFLD
WC_UKB	NAFLD	0.00129679	0.00246983	-0.00354399	0.00613758	0.599546			436	Multivariable Egger Intercept	WC_UKB	WC_UKB-and-BMI_UKB-on-NAFLD
BMI_UKB	NAFLD	-0.456814	0.291438	-1.02802	0.114395	0.117011	577.823	0.000305669	468	Multivariable IVM	BMI_UKB	WC_UKB-and-BMI_UKB-on-NAFLD
WC_UKB	NAFLD	1.27395	0.375743	0.53751	2.01039	0.000697678	577.823	0.000305669	468	Multivariable IVM	BMI_UKB	WC_UKB-and-BMI_UKB-on-NAFLD
BMI_UKB	NAFLD	-0.0796957	0.322991	-0.712747	0.553356	0.805107			468	Multivariable Median	BMI_UKB	WC_UKB-and-BMI_UKB-on-NAFLD
WC_UKB	NAFLD	0.79896	0.414348	-0.0131481	1.61107	0.0538263			468	Multivariable Median	BMI_UKB	WC_UKB-and-BMI_UKB-on-NAFLD
BMI_UKB	NAFLD	-0.134614	0.275265	-0.674123	0.404894	0.624816			468	Multivariable Lasso	BMI_UKB	WC_UKB-and-BMI_UKB-on-NAFLD
WC_UKB	NAFLD	0.852563	0.355834	0.155141	1.54998	0.0165771			468	Multivariable Lasso	BMI_UKB	WC_UKB-and-BMI_UKB-on-NAFLD
BMI_UKB	NAFLD	-0.435255	0.312458	-1.04766	0.177151	0.163618	577.776	0.00027328	468	Multivariable Egger	BMI_UKB	WC_UKB-and-BMI_UKB-on-NAFLD
WC_UKB	NAFLD	1.28043	0.377633	0.540287	2.02058	0.000697184	577.776	0.00027328	468	Multivariable Egger	BMI_UKB	WC_UKB-and-BMI_UKB-on-NAFLD
BMI_UKB	NAFLD	-0.000504077	0.00261603	-0.00563141	0.00462325	0.847204			468	Multivariable Egger Intercept	BMI_UKB	WC_UKB-and-BMI_UKB-on-NAFLD
WC_UKB	NAFLD	-0.000504077	0.00261603	-0.00563141	0.00462325	0.847204			468	Multivariable Egger Intercept	BMI_UKB	WC_UKB-and-BMI_UKB-on-NAFLD
NAFLD	Mahajan_Type2diabetes	0.244993	0.0366064	0.173245	0.31674	2.1922e-11	2661.22	0	373	Multivariable IVM	none	WC_UKB-and-NAFLD-on-Mahajan_Type2diabetes
WC_UKB	Mahajan_Type2diabetes	0.962377	0.0694813	0.826196	1.09856	1.25671e-43	2661.22	0	373	Multivariable IVM	none	WC_UKB-and-NAFLD-on-Mahajan_Type2diabetes
NAFLD	Mahajan_Type2diabetes	0.17317	0.0318137	0.110816	0.235524	5.23184e-08			373	Multivariable Median	none	WC_UKB-and-NAFLD-on-Mahajan_Type2diabetes
WC_UKB	Mahajan_Type2diabetes	1.20048	0.0535615	1.0955	1.30546	2.93482e-111			373	Multivariable Median	none	WC_UKB-and-NAFLD-on-Mahajan_Type2diabetes
NAFLD	Mahajan_Type2diabetes	0.175697	0.0180016	0.140415	0.21098	1.67004e-22			373	Multivariable Lasso	none	WC_UKB-and-NAFLD-on-Mahajan_Type2diabetes
WC_UKB	Mahajan_Type2diabetes	1.16723	0.033688	1.1012	1.23325	4.77032e-263			373	Multivariable Lasso	none	WC_UKB-and-NAFLD-on-Mahajan_Type2diabetes
NAFLD	Mahajan_Type2diabetes	0.257891	0.0461913	0.167358	0.348424	2.36257e-08	2659.7	0	373	Multivariable Egger	none	WC_UKB-and-NAFLD-on-Mahajan_Type2diabetes
WC_UKB	Mahajan_Type2diabetes	0.967846	0.0705697	0.829531	1.10616	8.28504e-43	2659.7	0	373	Multivariable Egger	none	WC_UKB-and-NAFLD-on-Mahajan_Type2diabetes
NAFLD	Mahajan_Type2diabetes	-0.000613256	0.00133698	-0.00323368	0.00200717	0.646458			373	Multivariable Egger Intercept	none	WC_UKB-and-NAFLD-on-Mahajan_Type2diabetes
WC_UKB	Mahajan_Type2diabetes	-0.000613256	0.00133698	-0.00323368	0.00200717	0.646458			373	Multivariable Egger Intercept	none	WC_UKB-and-NAFLD-on-Mahajan_Type2diabetes
NAFLD	Mahajan_Type2diabetes	0.299189	0.0439981	0.212955	0.385424	1.04582e-11	2615.84	0	373	Multivariable IVM	WC_UKB	WC_UKB-and-NAFLD-on-Mahajan_Type2diabetes
WC_UKB	Mahajan_Type2diabetes	0.933968	0.0704488	0.795891	1.07205	4.08834e-40	2615.84	0	373	Multivariable IVM	WC_UKB	WC_UKB-and-NAFLD-on-Mahajan_Type2diabetes
NAFLD	Mahajan_Type2diabetes	0.184116	0.0348718	0.115768	0.252463	1.29329e-07			373	Multivariable Median	WC_UKB	WC_UKB-and-NAFLD-on-Mahajan_Type2diabetes
WC_UKB	Mahajan_Type2diabetes	1.2068	0.0540646	1.10084	1.31277	2.28652e-110			373	Multivariable Median	WC_UKB	WC_UKB-and-NAFLD-on-Mahajan_Type2diabetes
NAFLD	Mahajan_Type2diabetes	0.194547	0.0247521	0.146034	0.24306	3.84682e-15			373	Multivariable Lasso	WC_UKB	WC_UKB-and-NAFLD-on-Mahajan_Type2diabetes
WC_UKB	Mahajan_Type2diabetes	1.14881	0.0364392	1.07739	1.22023	3.72025e-218			373	Multivariable Lasso	WC_UKB	WC_UKB-and-NAFLD-on-Mahajan_Type2diabetes
NAFLD	Mahajan_Type2diabetes	0.359175	0.0608998	0.239814	0.478537	3.68362e-09	2601.61	0	373	Multivariable Egger	WC_UKB	WC_UKB-and-NAFLD-on-Mahajan_Type2diabetes
WC_UKB	Mahajan_Type2diabetes	0.942694	0.0706188	0.804284	1.0811	1.19959e-40	2601.61	0	373	Multivariable Egger	WC_UKB	WC_UKB-and-NAFLD-on-Mahajan_Type2diabetes
NAFLD	Mahajan_Type2diabetes	-0.00207176	0.00145643	-0.00492631	0.000782799	0.154885			373	Multivariable Egger Intercept	WC_UKB	WC_UKB-and-NAFLD-on-Mahajan_Type2diabetes
WC_UKB	Mahajan_Type2diabetes	-0.00207176	0.00145643	-0.00492631	0.000782799	0.154885			373	Multivariable Egger Intercept	WC_UKB	WC_UKB-and-NAFLD-on-Mahajan_Type2diabetes
NAFLD	Mahajan_Type2diabetes	0.242624	0.0364212	0.17124	0.314008	2.70841e-11	2617.96	0	371	Multivariable IVM	NAFLD	WC_UKB-and-NAFLD-on-Mahajan_Type2diabetes
WC_UKB	Mahajan_Type2diabetes	0.976124	0.0693699	0.840162	1.11209	5.70171e-45	2617.96	0	371	Multivariable IVM	NAFLD	WC_UKB-and-NAFLD-on-Mahajan_Type2diabetes
NAFLD	Mahajan_Type2diabetes	0.173192	0.0321576	0.110164	0.236219	7.21539e-08			371	Multivariable Median	NAFLD	WC_UKB-and-NAFLD-on-Mahajan_Type2diabetes
WC_UKB	Mahajan_Type2diabetes	1.20827	0.0535958	1.10322	1.31331	1.53651e-112			371	Multivariable Median	NAFLD	WC_UKB-and-NAFLD-on-Mahajan_Type2diabetes
NAFLD	Mahajan_Type2diabetes	0.174087	0.017979	0.138848	0.209325	3.5687e-22			371	Multivariable Lasso	NAFLD	WC_UKB-and-NAFLD-on-Mahajan_Type2diabetes
WC_UKB	Mahajan_Type2diabetes	1.17121	0.0336138	1.10533	1.2371	5.39008e-266			371	Multivariable Lasso	NAFLD	WC_UKB-and-NAFLD-on-Mahajan_Type2diabetes
NAFLD	Mahajan_Type2diabetes	0.249202	0.0460971	0.158853	0.339551	6.44412e-08	2617.58	0	371	Multivariable Egger	NAFLD	WC_UKB-and-NAFLD-on-Mahajan_Type2diabetes
WC_UKB	Mahajan_Type2diabetes	0.978771	0.0703795	0.84083	1.11671	5.73943e-44	2617.58	0	371	Multivariable Egger	NAFLD	WC_UKB-and-NAFLD-on-Mahajan_Type2diabetes
NAFLD	Mahajan_Type2diabetes	-0.000311671	0.00133595	-0.00293008	0.00230674	0.815532			371	Multivariable Egger Intercept	NAFLD	WC_UKB-and-NAFLD-on-Mahajan_Type2diabetes
WC_UKB	Mahajan_Type2diabetes	-0.000311671	0.00133595	-0.00293008	0.00230674	0.815532			371	Multivariable Egger Intercept	NAFLD	WC_UKB-and-NAFLD-on-Mahajan_Type2diabetes
NAFLD	van_der_Harst_CAD	0.0148843	0.0228345	-0.0298705	0.059639	0.514509	1306.82	1.95716e-104	373	Multivariable IVM	none	WC_UKB-and-NAFLD-on-van_der_Harst_CAD
WC_UKB	van_der_Harst_CAD	0.392906	0.0428284	0.308964	0.476848	4.55973e-20	1306.82	1.95716e-104	373	Multivariable IVM	none	WC_UKB-and-NAFLD-on-van_der_Harst_CAD
NAFLD	van_der_Harst_CAD	0.0463573	0.0255728	-0.0037644	0.096479	0.0698688			373	Multivariable Median	none	WC_UKB-and-NAFLD-on-van_der_Harst_CAD
WC_UKB	van_der_Harst_CAD	0.42855	0.040107	0.349942	0.507158	1.19426e-26			373	Multivariable Median	none	WC_UKB-and-NAFLD-on-van_der_Harst_CAD
NAFLD	van_der_Harst_CAD	0.0258839	0.0195529	-0.0124391	0.0642069	0.185573			373	Multivariable Lasso	none	WC_UKB-and-NAFLD-on-van_der_Harst_CAD
WC_UKB	van_der_Harst_CAD	0.444893	0.0282432	0.389538	0.500249	6.63131e-56			373	Multivariable Lasso	none	WC_UKB-and-NAFLD-on-van_der_Harst_CAD
NAFLD	van_der_Harst_CAD	-0.0434542	0.0285181	-0.0993487	0.0124403	0.127574	1268.65	8.74068e-99	373	Multivariable Egger	none	WC_UKB-and-NAFLD-on-van_der_Harst_CAD
WC_UKB	van_der_Harst_CAD	0.3688	0.0428685	0.284779	0.45282	7.76365e-18	1268.65	8.74068e-99	373	Multivariable Egger	none	WC_UKB-and-NAFLD-on-van_der_Harst_CAD
NAFLD	van_der_Harst_CAD	0.00274246	0.00082197	0.00113143	0.0043535	0.000848545			373	Multivariable Egger Intercept	none	WC_UKB-and-NAFLD-on-van_der_Harst_CAD
WC_UKB	van_der_Harst_CAD	0.00274246	0.00082197	0.00113143	0.0043535	0.000848545			373	Multivariable Egger Intercept	none	WC_UKB-and-NAFLD-on-van_der_Harst_CAD
NAFLD	van_der_Harst_CAD	0.0184098	0.0267111	-0.0339429	0.0707626	0.490684	1222.12	2.12561e-91	373	Multivariable IVM	WC_UKB	WC_UKB-and-NAFLD-on-van_der_Harst_CAD
WC_UKB	van_der_Harst_CAD	0.386353	0.0424138	0.303223	0.469482	8.30377e-20	1222.12	2.12561e-91	373	Multivariable IVM	WC_UKB	WC_UKB-and-NAFLD-on-van_der_Harst_CAD
NAFLD	van_der_Harst_CAD	0.059224	0.0256819	0.00888845	0.109559	0.0211071			373	Multivariable Median	WC_UKB	WC_UKB-and-NAFLD-on-van_der_Harst_CAD
WC_UKB	van_der_Harst_CAD	0.430561	0.0404598	0.351262	0.509861	1.906e-26			373	Multivariable Median	WC_UKB	WC_UKB-and-NAFLD-on-van_der_Harst_CAD
NAFLD	van_der_Harst_CAD	0.0328813	0.0194232	-0.00518755	0.0709501	0.0904775			373	Multivariable Lasso	WC_UKB	WC_UKB-and-NAFLD-on-van_der_Harst_CAD
WC_UKB	van_der_Harst_CAD	0.435181	0.0280273	0.380249	0.490113	2.27575e-54			373	Multivariable Lasso	WC_UKB	WC_UKB-and-NAFLD-on-van_der_Harst_CAD
NAFLD	van_der_Harst_CAD	-0.0713044	0.0366825	-0.143201	0.000592046	0.0519166	1182.73	1.01873e-85	373	Multivariable Egger	WC_UKB	WC_UKB-and-NAFLD-on-van_der_Harst_CAD
WC_UKB	van_der_Harst_CAD	0.374149	0.0419255	0.291976	0.456321	4.49195e-19	1182.73	1.01873e-85	373	Multivariable Egger	WC_UKB	WC_UKB-and-NAFLD-on-van_der_Harst_CAD
NAFLD	van_der_Harst_CAD	0.00307325	0.000875543	0.00135722	0.00478928	0.000447927			373	Multivariable Egger Intercept	WC_UKB	WC_UKB-and-NAFLD-on-van_der_Harst_CAD
WC_UKB	van_der_Harst_CAD	0.00307325	0.000875543	0.00135722	0.00478928	0.000447927			373	Multivariable Egger Intercept	WC_UKB	WC_UKB-and-NAFLD-on-van_der_Harst_CAD
NAFLD	van_der_Harst_CAD	0.0134609	0.022763	-0.0311538	0.0580757	0.554285	1290.54	1.90677e-102	371	Multivariable IVM	NAFLD	WC_UKB-and-NAFLD-on-van_der_Harst_CAD
WC_UKB	van_der_Harst_CAD	0.400802	0.0428375	0.316842	0.484762	8.25548e-21	1290.54	1.90677e-102	371	Multivariable IVM	NAFLD	WC_UKB-and-NAFLD-on-van_der_Harst_CAD
NAFLD	van_der_Harst_CAD	0.0429644	0.0255993	-0.00720924	0.0931381	0.0932798			371	Multivariable Median	NAFLD	WC_UKB-and-NAFLD-on-van_der_Harst_CAD
WC_UKB	van_der_Harst_CAD	0.432892	0.0396097	0.355258	0.510525	8.3841e-28			371	Multivariable Median	NAFLD	WC_UKB-and-NAFLD-on-van_der_Harst_CAD
NAFLD	van_der_Harst_CAD	0.022166	0.0194846	-0.0160231	0.0603551	0.255281			371	Multivariable Lasso	NAFLD	WC_UKB-and-NAFLD-on-van_der_Harst_CAD
WC_UKB	van_der_Harst_CAD	0.453797	0.0280496	0.39882	0.508773	7.17056e-59			371	Multivariable Lasso	NAFLD	WC_UKB-and-NAFLD-on-van_der_Harst_CAD
NAFLD	van_der_Harst_CAD	-0.0489816	0.0284498	-0.104742	0.00677886	0.0851258	1247.5	4.59464e-96	371	Multivariable Egger	NAFLD	WC_UKB-and-NAFLD-on-van_der_Harst_CAD
WC_UKB	van_der_Harst_CAD	0.376301	0.0427314	0.292549	0.460053	1.29474e-18	1247.5	4.59464e-96	371	Multivariable Egger	NAFLD	WC_UKB-and-NAFLD-on-van_der_Harst_CAD
NAFLD	van_der_Harst_CAD	0.00292514	0.000820997	0.00131602	0.00453427	0.000366758			371	Multivariable Egger Intercept	NAFLD	WC_UKB-and-NAFLD-on-van_der_Harst_CAD
WC_UKB	van_der_Harst_CAD	0.00292514	0.000820997	0.00131602	0.00453427	0.000366758			371	Multivariable Egger Intercept	NAFLD	WC_UKB-and-NAFLD-on-van_der_Harst_CAD
NAFLD	Scott_Type2Diabetes	0.24991	0.04225	0.167102	0.332719	3.31789e-09	964.646	2.15229e-54	373	Multivariable IVM	none	WC_UKB-and-NAFLD-on-Scott_Type2Diabetes
WC_UKB	Scott_Type2Diabetes	0.859713	0.0807768	0.701393	1.01803	1.87853e-26	964.646	2.15229e-54	373	Multivariable IVM	none	WC_UKB-and-NAFLD-on-Scott_Type2Diabetes
NAFLD	Scott_Type2Diabetes	0.200285	0.0425436	0.116902	0.283669	2.50441e-06			373	Multivariable Median	none	WC_UKB-and-NAFLD-on-Scott_Type2Diabetes
WC_UKB	Scott_Type2Diabetes	0.986171	0.0851143	0.81935	1.15299	4.82793e-31			373	Multivariable Median	none	WC_UKB-and-NAFLD-on-Scott_Type2Diabetes
NAFLD	Scott_Type2Diabetes	0.190549	0.029344	0.133036	0.248062	8.37975e-11			373	Multivariable Lasso	none	WC_UKB-and-NAFLD-on-Scott_Type2Diabetes
WC_UKB	Scott_Type2Diabetes	0.914453	0.0561496	0.804402	1.0245	1.24082e-59			373	Multivariable Lasso	none	WC_UKB-and-NAFLD-on-Scott_Type2Diabetes
NAFLD	Scott_Type2Diabetes	0.254916	0.0530233	0.150993	0.35884	1.52734e-06	964.582	1.35646e-54	373	Multivariable Egger	none	WC_UKB-and-NAFLD-on-Scott_Type2Diabetes
WC_UKB	Scott_Type2Diabetes	0.86206	0.0822596	0.700834	1.02329	1.0703e-25	964.582	1.35646e-54	373	Multivariable Egger	none	WC_UKB-and-NAFLD-on-Scott_Type2Diabetes
NAFLD	Scott_Type2Diabetes	-0.000242515	0.00154855	-0.00327761	0.00279258	0.875554			373	Multivariable Egger Intercept	none	WC_UKB-and-NAFLD-on-Scott_Type2Diabetes
WC_UKB	Scott_Type2Diabetes	-0.000242515	0.00154855	-0.00327761	0.00279258	0.875554			373	Multivariable Egger Intercept	none	WC_UKB-and-NAFLD-on-Scott_Type2Diabetes
NAFLD	Scott_Type2Diabetes	0.293408	0.052143	0.191209	0.395606	1.83389e-08	961.008	6.62313e-54	373	Multivariable IVM	WC_UKB	WC_UKB-and-NAFLD-on-Scott_Type2Diabetes
WC_UKB	Scott_Type2Diabetes	0.834784	0.0826887	0.672717	0.996851	5.78295e-24	961.008	6.62313e-54	373	Multivariable IVM	WC_UKB	WC_UKB-and-NAFLD-on-Scott_Type2Diabetes
NAFLD	Scott_Type2Diabetes	0.234577	0.0504762	0.135646	0.333509	3.36339e-06			373	Multivariable Median	WC_UKB	WC_UKB-and-NAFLD-on-Scott_Type2Diabetes
WC_UKB	Scott_Type2Diabetes	0.958686	0.0874801	0.787228	1.13014	6.02244e-28			373	Multivariable Median	WC_UKB	WC_UKB-and-NAFLD-on-Scott_Type2Diabetes
NAFLD	Scott_Type2Diabetes	0.205514	0.0369251	0.133142	0.277886	2.61113e-08			373	Multivariable Lasso	WC_UKB	WC_UKB-and-NAFLD-on-Scott_Type2Diabetes
WC_UKB	Scott_Type2Diabetes	0.920506	0.0575184	0.807772	1.03324	1.20463e-57			373	Multivariable Lasso	WC_UKB	WC_UKB-and-NAFLD-on-Scott_Type2Diabetes
NAFLD	Scott_Type2Diabetes	0.335503	0.0725145	0.193377	0.477629	3.71542e-06	959.198	7.1737e-54	373	Multivariable Egger	WC_UKB	WC_UKB-and-NAFLD-on-Scott_Type2Diabetes
WC_UKB	Scott_Type2Diabetes	0.841172	0.0830747	0.678349	1.004	4.25833e-24	959.198	7.1737e-54	373	Multivariable Egger	WC_UKB	WC_UKB-and-NAFLD-on-Scott_Type2Diabetes
NAFLD	Scott_Type2Diabetes	-0.00143417	0.00171613	-0.00479773	0.00192939	0.403324			373	Multivariable Egger Intercept	WC_UKB	WC_UKB-and-NAFLD-on-Scott_Type2Diabetes
WC_UKB	Scott_Type2Diabetes	-0.00143417	0.00171613	-0.00479773	0.00192939	0.403324			373	Multivariable Egger Intercept	WC_UKB	WC_UKB-and-NAFLD-on-Scott_Type2Diabetes
NAFLD	Scott_Type2Diabetes	0.247408	0.0419497	0.165188	0.329628	3.68517e-09	945.086	3.4226e-52	371	Multivariable IVM	NAFLD	WC_UKB-and-NAFLD-on-Scott_Type2Diabetes
WC_UKB	Scott_Type2Diabetes	0.874355	0.0804738	0.716629	1.03208	1.69058e-27	945.086	3.4226e-52	371	Multivariable IVM	NAFLD	WC_UKB-and-NAFLD-on-Scott_Type2Diabetes
NAFLD	Scott_Type2Diabetes	0.200297	0.0433193	0.115393	0.285201	3.76885e-06			371	Multivariable Median	NAFLD	WC_UKB-and-NAFLD-on-Scott_Type2Diabetes
WC_UKB	Scott_Type2Diabetes	0.990255	0.0852638	0.823141	1.15737	3.49756e-31			371	Multivariable Median	NAFLD	WC_UKB-and-NAFLD-on-Scott_Type2Diabetes
NAFLD	Scott_Type2Diabetes	0.188342	0.0293113	0.130893	0.245792	1.31366e-10			371	Multivariable Lasso	NAFLD	WC_UKB-and-NAFLD-on-Scott_Type2Diabetes
WC_UKB	Scott_Type2Diabetes	0.933111	0.0560723	0.823211	1.04301	3.50503e-62			371	Multivariable Lasso	NAFLD	WC_UKB-and-NAFLD-on-Scott_Type2Diabetes
NAFLD	Scott_Type2Diabetes	0.245164	0.05279	0.141697	0.34863	3.41516e-06	945.074	2.13891e-52	371	Multivariable Egger	NAFLD	WC_UKB-and-NAFLD-on-Scott_Type2Diabetes
WC_UKB	Scott_Type2Diabetes	0.873351	0.0818416	0.712945	1.03376	1.38754e-26	945.074	2.13891e-52	371	Multivariable Egger	NAFLD	WC_UKB-and-NAFLD-on-Scott_Type2Diabetes
NAFLD	Scott_Type2Diabetes	0.000108373	0.00154368	-0.00291718	0.00313392	0.944031			371	Multivariable Egger Intercept	NAFLD	WC_UKB-and-NAFLD-on-Scott_Type2Diabetes
WC_UKB	Scott_Type2Diabetes	0.000108373	0.00154368	-0.00291718	0.00313392	0.944031			371	Multivariable Egger Intercept	NAFLD	WC_UKB-and-NAFLD-on-Scott_Type2Diabetes
NAFLD	Nikpay_CAD	-0.0016066	0.0272528	-0.055021	0.0518078	0.95299	653.734	4.9596e-18	372	Multivariable IVM	none	WC_UKB-and-NAFLD-on-Nikpay_CAD
WC_UKB	Nikpay_CAD	0.423961	0.0516548	0.32272	0.525203	2.25664e-16	653.734	4.9596e-18	372	Multivariable IVM	none	WC_UKB-and-NAFLD-on-Nikpay_CAD
NAFLD	Nikpay_CAD	0.0213593	0.0352728	-0.047774	0.0904926	0.544816			372	Multivariable Median	none	WC_UKB-and-NAFLD-on-Nikpay_CAD
WC_UKB	Nikpay_CAD	0.406075	0.0613288	0.285873	0.526277	3.56119e-11			372	Multivariable Median	none	WC_UKB-and-NAFLD-on-Nikpay_CAD
NAFLD	Nikpay_CAD	2.72458e-05	0.0300891	-0.0589462	0.0590007	0.999278			372	Multivariable Lasso	none	WC_UKB-and-NAFLD-on-Nikpay_CAD
WC_UKB	Nikpay_CAD	0.448934	0.0444714	0.361772	0.536097	5.8194e-24			372	Multivariable Lasso	none	WC_UKB-and-NAFLD-on-Nikpay_CAD
NAFLD	Nikpay_CAD	-0.0522047	0.0342664	-0.119366	0.0149562	0.127635	643.608	3.41035e-17	372	Multivariable Egger	none	WC_UKB-and-NAFLD-on-Nikpay_CAD
WC_UKB	Nikpay_CAD	0.401858	0.052136	0.299673	0.504043	1.27922e-14	643.608	3.41035e-17	372	Multivariable Egger	none	WC_UKB-and-NAFLD-on-Nikpay_CAD
NAFLD	Nikpay_CAD	0.00238232	0.000988739	0.000444423	0.00432021	0.0159766			372	Multivariable Egger Intercept	none	WC_UKB-and-NAFLD-on-Nikpay_CAD
WC_UKB	Nikpay_CAD	0.00238232	0.000988739	0.000444423	0.00432021	0.0159766			372	Multivariable Egger Intercept	none	WC_UKB-and-NAFLD-on-Nikpay_CAD
NAFLD	Nikpay_CAD	-0.00572561	0.0328199	-0.0700514	0.0586002	0.861508	629.672	8.80788e-16	372	Multivariable IVM	WC_UKB	WC_UKB-and-NAFLD-on-Nikpay_CAD
WC_UKB	Nikpay_CAD	0.421947	0.0519937	0.320041	0.523853	4.84439e-16	629.672	8.80788e-16	372	Multivariable IVM	WC_UKB	WC_UKB-and-NAFLD-on-Nikpay_CAD
NAFLD	Nikpay_CAD	0.024939	0.0367627	-0.0471146	0.0969927	0.497532			372	Multivariable Median	WC_UKB	WC_UKB-and-NAFLD-on-Nikpay_CAD
WC_UKB	Nikpay_CAD	0.404757	0.0616449	0.283936	0.525579	5.17009e-11			372	Multivariable Median	WC_UKB	WC_UKB-and-NAFLD-on-Nikpay_CAD
NAFLD	Nikpay_CAD	0.00827767	0.0300279	-0.0505758	0.0671312	0.782804			372	Multivariable Lasso	WC_UKB	WC_UKB-and-NAFLD-on-Nikpay_CAD
WC_UKB	Nikpay_CAD	0.442274	0.0442854	0.355477	0.529072	1.73911e-23			372	Multivariable Lasso	WC_UKB	WC_UKB-and-NAFLD-on-Nikpay_CAD
NAFLD	Nikpay_CAD	-0.0926211	0.0458284	-0.182443	-0.00279915	0.0432753	617.533	8.37884e-15	372	Multivariable Egger	WC_UKB	WC_UKB-and-NAFLD-on-Nikpay_CAD
WC_UKB	Nikpay_CAD	0.410256	0.0517422	0.308843	0.511669	2.21191e-15	617.533	8.37884e-15	372	Multivariable Egger	WC_UKB	WC_UKB-and-NAFLD-on-Nikpay_CAD
NAFLD	Nikpay_CAD	0.00290758	0.00107959	0.000791624	0.00502355	0.00707643			372	Multivariable Egger Intercept	WC_UKB	WC_UKB-and-NAFLD-on-Nikpay_CAD
WC_UKB	Nikpay_CAD	0.00290758	0.00107959	0.000791624	0.00502355	0.00707643			372	Multivariable Egger Intercept	WC_UKB	WC_UKB-and-NAFLD-on-Nikpay_CAD
NAFLD	Nikpay_CAD	-0.00222425	0.027318	-0.0557665	0.051318	0.935107	652.716	3.47472e-18	370	Multivariable IVM	NAFLD	WC_UKB-and-NAFLD-on-Nikpay_CAD
WC_UKB	Nikpay_CAD	0.427471	0.0519681	0.325615	0.529326	1.9415e-16	652.716	3.47472e-18	370	Multivariable IVM	NAFLD	WC_UKB-and-NAFLD-on-Nikpay_CAD
NAFLD	Nikpay_CAD	0.0142261	0.0350236	-0.0544189	0.0828711	0.684606			370	Multivariable Median	NAFLD	WC_UKB-and-NAFLD-on-Nikpay_CAD
WC_UKB	Nikpay_CAD	0.414957	0.0622567	0.292936	0.536978	2.64197e-11			370	Multivariable Median	NAFLD	WC_UKB-and-NAFLD-on-Nikpay_CAD
NAFLD	Nikpay_CAD	-0.00406985	0.0301481	-0.0631591	0.0550194	0.892616			370	Multivariable Lasso	NAFLD	WC_UKB-and-NAFLD-on-Nikpay_CAD
WC_UKB	Nikpay_CAD	0.463595	0.0449575	0.37548	0.55171	6.228e-25			370	Multivariable Lasso	NAFLD	WC_UKB-and-NAFLD-on-Nikpay_CAD
NAFLD	Nikpay_CAD	-0.0549487	0.0344335	-0.122437	0.0125397	0.110535	641.905	2.799e-17	370	Multivariable Egger	NAFLD	WC_UKB-and-NAFLD-on-Nikpay_CAD
WC_UKB	Nikpay_CAD	0.405629	0.0523485	0.303028	0.508231	9.28921e-15	641.905	2.799e-17	370	Multivariable Egger	NAFLD	WC_UKB-and-NAFLD-on-Nikpay_CAD
NAFLD	Nikpay_CAD	0.00247327	0.000994825	0.000523452	0.00442309	0.0129137			370	Multivariable Egger Intercept	NAFLD	WC_UKB-and-NAFLD-on-Nikpay_CAD
WC_UKB	Nikpay_CAD	0.00247327	0.000994825	0.000523452	0.00442309	0.0129137			370	Multivariable Egger Intercept	NAFLD	WC_UKB-and-NAFLD-on-Nikpay_CAD
GIANT_2015_BMI	NAFLD	-0.870696	0.448269	-1.74929	0.00789464	0.0520944	105.806	0.00369367	72	Multivariable IVM	none	GIANT_2015_WC-and-GIANT_2015_BMI-on-NAFLD
GIANT_2015_WC	NAFLD	1.51641	0.504341	0.527917	2.5049	0.00264092	105.806	0.00369367	72	Multivariable IVM	none	GIANT_2015_WC-and-GIANT_2015_BMI-on-NAFLD
GIANT_2015_BMI	NAFLD	-0.667476	0.486939	-1.62186	0.286906	0.17045			72	Multivariable Median	none	GIANT_2015_WC-and-GIANT_2015_BMI-on-NAFLD
GIANT_2015_WC	NAFLD	1.28856	0.542263	0.225746	2.35138	0.0174888			72	Multivariable Median	none	GIANT_2015_WC-and-GIANT_2015_BMI-on-NAFLD
GIANT_2015_BMI	NAFLD	-0.908162	0.386301	-1.6653	-0.151026	0.0187271			72	Multivariable Lasso	none	GIANT_2015_WC-and-GIANT_2015_BMI-on-NAFLD
GIANT_2015_WC	NAFLD	1.51884	0.431461	0.673195	2.36449	0.00043117			72	Multivariable Lasso	none	GIANT_2015_WC-and-GIANT_2015_BMI-on-NAFLD
GIANT_2015_BMI	NAFLD	-0.853403	0.452121	-1.73954	0.0327382	0.0590859	105.443	0.00312223	72	Multivariable Egger	none	GIANT_2015_WC-and-GIANT_2015_BMI-on-NAFLD
GIANT_2015_WC	NAFLD	1.61423	0.54533	0.545405	2.68306	0.00307538	105.443	0.00312223	72	Multivariable Egger	none	GIANT_2015_WC-and-GIANT_2015_BMI-on-NAFLD
GIANT_2015_BMI	NAFLD	-0.00320858	0.00657831	-0.0161018	0.00968467	0.625726			72	Multivariable Egger Intercept	none	GIANT_2015_WC-and-GIANT_2015_BMI-on-NAFLD
GIANT_2015_WC	NAFLD	-0.00320858	0.00657831	-0.0161018	0.00968467	0.625726			72	Multivariable Egger Intercept	none	GIANT_2015_WC-and-GIANT_2015_BMI-on-NAFLD
GIANT_2015_BMI	NAFLD	-0.676262	0.448185	-1.55469	0.202164	0.131327	104.569	0.00467707	72	Multivariable IVM	GIANT_2015_WC	GIANT_2015_WC-and-GIANT_2015_BMI-on-NAFLD
GIANT_2015_WC	NAFLD	1.24138	0.487923	0.285074	2.1977	0.0109521	104.569	0.00467707	72	Multivariable IVM	GIANT_2015_WC	GIANT_2015_WC-and-GIANT_2015_BMI-on-NAFLD
GIANT_2015_BMI	NAFLD	-0.806956	0.489976	-1.76729	0.15338	0.0995727			72	Multivariable Median	GIANT_2015_WC	GIANT_2015_WC-and-GIANT_2015_BMI-on-NAFLD
GIANT_2015_WC	NAFLD	1.33101	0.527695	0.296749	2.36528	0.0116586			72	Multivariable Median	GIANT_2015_WC	GIANT_2015_WC-and-GIANT_2015_BMI-on-NAFLD
GIANT_2015_BMI	NAFLD	-0.739226	0.389122	-1.50189	0.02344	0.0574691			72	Multivariable Lasso	GIANT_2015_WC	GIANT_2015_WC-and-GIANT_2015_BMI-on-NAFLD
GIANT_2015_WC	NAFLD	1.26628	0.419041	0.444971	2.08758	0.0025124			72	Multivariable Lasso	GIANT_2015_WC	GIANT_2015_WC-and-GIANT_2015_BMI-on-NAFLD
GIANT_2015_BMI	NAFLD	-0.672991	0.448386	-1.55181	0.20583	0.133377	103.162	0.00484545	72	Multivariable Egger	GIANT_2015_WC	GIANT_2015_WC-and-GIANT_2015_BMI-on-NAFLD
GIANT_2015_WC	NAFLD	1.4686	0.541418	0.407442	2.52976	0.00667759	103.162	0.00484545	72	Multivariable Egger	GIANT_2015_WC	GIANT_2015_WC-and-GIANT_2015_BMI-on-NAFLD
GIANT_2015_BMI	NAFLD	-0.00637975	0.0065767	-0.0192698	0.00651034	0.33202			72	Multivariable Egger Intercept	GIANT_2015_WC	GIANT_2015_WC-and-GIANT_2015_BMI-on-NAFLD
GIANT_2015_WC	NAFLD	-0.00637975	0.0065767	-0.0192698	0.00651034	0.33202			72	Multivariable Egger Intercept	GIANT_2015_WC	GIANT_2015_WC-and-GIANT_2015_BMI-on-NAFLD
GIANT_2015_BMI	NAFLD	-0.923677	0.471354	-1.84751	0.000158758	0.0500394	100.64	0.00962492	72	Multivariable IVM	GIANT_2015_BMI	GIANT_2015_WC-and-GIANT_2015_BMI-on-NAFLD
GIANT_2015_WC	NAFLD	1.56653	0.536964	0.514105	2.61896	0.00352969	100.64	0.00962492	72	Multivariable IVM	GIANT_2015_BMI	GIANT_2015_WC-and-GIANT_2015_BMI-on-NAFLD
GIANT_2015_BMI	NAFLD	-0.667476	0.508115	-1.66336	0.32841	0.18897			72	Multivariable Median	GIANT_2015_BMI	GIANT_2015_WC-and-GIANT_2015_BMI-on-NAFLD
GIANT_2015_WC	NAFLD	1.28856	0.569626	0.172115	2.40501	0.0236901			72	Multivariable Median	GIANT_2015_BMI	GIANT_2015_WC-and-GIANT_2015_BMI-on-NAFLD
GIANT_2015_BMI	NAFLD	-1.09541	0.41056	-1.90009	-0.290726	0.00762851			72	Multivariable Lasso	GIANT_2015_BMI	GIANT_2015_WC-and-GIANT_2015_BMI-on-NAFLD
GIANT_2015_WC	NAFLD	1.73757	0.463352	0.829419	2.64573	0.000176832			72	Multivariable Lasso	GIANT_2015_BMI	GIANT_2015_WC-and-GIANT_2015_BMI-on-NAFLD
GIANT_2015_BMI	NAFLD	-0.899466	0.477035	-1.83444	0.0355061	0.0593579	100.34	0.00818365	72	Multivariable Egger	GIANT_2015_BMI	GIANT_2015_WC-and-GIANT_2015_BMI-on-NAFLD
GIANT_2015_WC	NAFLD	1.64563	0.56741	0.53353	2.75773	0.0037286	100.34	0.00818365	72	Multivariable Egger	GIANT_2015_BMI	GIANT_2015_WC-and-GIANT_2015_BMI-on-NAFLD
GIANT_2015_BMI	NAFLD	-0.00291522	0.00641732	-0.0154929	0.0096625	0.649632			72	Multivariable Egger Intercept	GIANT_2015_BMI	GIANT_2015_WC-and-GIANT_2015_BMI-on-NAFLD
GIANT_2015_WC	NAFLD	-0.00291522	0.00641732	-0.0154929	0.0096625	0.649632			72	Multivariable Egger Intercept	GIANT_2015_BMI	GIANT_2015_WC-and-GIANT_2015_BMI-on-NAFLD
GIANT_2015_WC	Mahajan_Type2diabetes	0.711406	0.320266	0.0836967	1.33911	0.0263307	2779.88	0	43	Multivariable IVM	none	GIANT_2015_WC-and-NAFLD-on-Mahajan_Type2diabetes
NAFLD	Mahajan_Type2diabetes	0.0765301	0.177468	-0.2713	0.42436	0.666298	2779.88	0	43	Multivariable IVM	none	GIANT_2015_WC-and-NAFLD-on-Mahajan_Type2diabetes
GIANT_2015_WC	Mahajan_Type2diabetes	1.07401	0.0912013	0.895255	1.25276	5.17626e-32			43	Multivariable Median	none	GIANT_2015_WC-and-NAFLD-on-Mahajan_Type2diabetes
NAFLD	Mahajan_Type2diabetes	0.178344	0.0615454	0.0577171	0.298971	0.00375837			43	Multivariable Median	none	GIANT_2015_WC-and-NAFLD-on-Mahajan_Type2diabetes
GIANT_2015_WC	Mahajan_Type2diabetes	0.989503	0.0728782	0.846664	1.13234	5.4469e-42			43	Multivariable Lasso	none	GIANT_2015_WC-and-NAFLD-on-Mahajan_Type2diabetes
NAFLD	Mahajan_Type2diabetes	0.137887	0.0783964	-0.0157666	0.291542	0.0786029			43	Multivariable Lasso	none	GIANT_2015_WC-and-NAFLD-on-Mahajan_Type2diabetes
GIANT_2015_WC	Mahajan_Type2diabetes	2.07176	0.793568	0.516398	3.62713	0.00903591	2557.86	0	43	Multivariable Egger	none	GIANT_2015_WC-and-NAFLD-on-Mahajan_Type2diabetes
NAFLD	Mahajan_Type2diabetes	-0.0525993	0.185759	-0.416681	0.311483	0.777056	2557.86	0	43	Multivariable Egger	none	GIANT_2015_WC-and-NAFLD-on-Mahajan_Type2diabetes
GIANT_2015_WC	Mahajan_Type2diabetes	-0.0411369	0.0220774	-0.0844078	0.00213397	0.0624193			43	Multivariable Egger Intercept	none	GIANT_2015_WC-and-NAFLD-on-Mahajan_Type2diabetes
NAFLD	Mahajan_Type2diabetes	-0.0411369	0.0220774	-0.0844078	0.00213397	0.0624193			43	Multivariable Egger Intercept	none	GIANT_2015_WC-and-NAFLD-on-Mahajan_Type2diabetes
GIANT_2015_WC	Mahajan_Type2diabetes	0.711406	0.320266	0.0836967	1.33911	0.0263307	2779.88	0	43	Multivariable IVM	GIANT_2015_WC	GIANT_2015_WC-and-NAFLD-on-Mahajan_Type2diabetes
NAFLD	Mahajan_Type2diabetes	0.0765301	0.177468	-0.2713	0.42436	0.666298	2779.88	0	43	Multivariable IVM	GIANT_2015_WC	GIANT_2015_WC-and-NAFLD-on-Mahajan_Type2diabetes
GIANT_2015_WC	Mahajan_Type2diabetes	1.07401	0.0912013	0.895255	1.25276	5.17626e-32			43	Multivariable Median	GIANT_2015_WC	GIANT_2015_WC-and-NAFLD-on-Mahajan_Type2diabetes
NAFLD	Mahajan_Type2diabetes	0.178344	0.0615454	0.0577171	0.298971	0.00375837			43	Multivariable Median	GIANT_2015_WC	GIANT_2015_WC-and-NAFLD-on-Mahajan_Type2diabetes
GIANT_2015_WC	Mahajan_Type2diabetes	0.989503	0.0728782	0.846664	1.13234	5.4469e-42			43	Multivariable Lasso	GIANT_2015_WC	GIANT_2015_WC-and-NAFLD-on-Mahajan_Type2diabetes
NAFLD	Mahajan_Type2diabetes	0.137887	0.0783964	-0.0157666	0.291542	0.0786029			43	Multivariable Lasso	GIANT_2015_WC	GIANT_2015_WC-and-NAFLD-on-Mahajan_Type2diabetes
GIANT_2015_WC	Mahajan_Type2diabetes	2.07176	0.793568	0.516398	3.62713	0.00903591	2557.86	0	43	Multivariable Egger	GIANT_2015_WC	GIANT_2015_WC-and-NAFLD-on-Mahajan_Type2diabetes
NAFLD	Mahajan_Type2diabetes	-0.0525993	0.185759	-0.416681	0.311483	0.777056	2557.86	0	43	Multivariable Egger	GIANT_2015_WC	GIANT_2015_WC-and-NAFLD-on-Mahajan_Type2diabetes
GIANT_2015_WC	Mahajan_Type2diabetes	-0.0411369	0.0220774	-0.0844078	0.00213397	0.0624193			43	Multivariable Egger Intercept	GIANT_2015_WC	GIANT_2015_WC-and-NAFLD-on-Mahajan_Type2diabetes
NAFLD	Mahajan_Type2diabetes	-0.0411369	0.0220774	-0.0844078	0.00213397	0.0624193			43	Multivariable Egger Intercept	GIANT_2015_WC	GIANT_2015_WC-and-NAFLD-on-Mahajan_Type2diabetes
GIANT_2015_WC	Mahajan_Type2diabetes	0.760613	0.320299	0.132838	1.38839	0.0175635	2751.15	0	43	Multivariable IVM	NAFLD	GIANT_2015_WC-and-NAFLD-on-Mahajan_Type2diabetes
NAFLD	Mahajan_Type2diabetes	0.106368	0.170733	-0.228262	0.440998	0.53328	2751.15	0	43	Multivariable IVM	NAFLD	GIANT_2015_WC-and-NAFLD-on-Mahajan_Type2diabetes
GIANT_2015_WC	Mahajan_Type2diabetes	1.07401	0.0894811	0.898627	1.24939	3.44281e-33			43	Multivariable Median	NAFLD	GIANT_2015_WC-and-NAFLD-on-Mahajan_Type2diabetes
NAFLD	Mahajan_Type2diabetes	0.178344	0.050971	0.0784425	0.278245	0.000467137			43	Multivariable Median	NAFLD	GIANT_2015_WC-and-NAFLD-on-Mahajan_Type2diabetes
GIANT_2015_WC	Mahajan_Type2diabetes	1.00503	0.0603452	0.886751	1.1233	2.80204e-62			43	Multivariable Lasso	NAFLD	GIANT_2015_WC-and-NAFLD-on-Mahajan_Type2diabetes
NAFLD	Mahajan_Type2diabetes	0.182977	0.0273171	0.129437	0.236518	2.1092e-11			43	Multivariable Lasso	NAFLD	GIANT_2015_WC-and-NAFLD-on-Mahajan_Type2diabetes
GIANT_2015_WC	Mahajan_Type2diabetes	2.12564	0.790331	0.576622	3.67466	0.00715463	2528.11	0	43	Multivariable Egger	NAFLD	GIANT_2015_WC-and-NAFLD-on-Mahajan_Type2diabetes
NAFLD	Mahajan_Type2diabetes	-0.0219258	0.179221	-0.373192	0.32934	0.90263	2528.11	0	43	Multivariable Egger	NAFLD	GIANT_2015_WC-and-NAFLD-on-Mahajan_Type2diabetes
GIANT_2015_WC	Mahajan_Type2diabetes	-0.0412324	0.0219487	-0.0842511	0.0017864	0.0603027			43	Multivariable Egger Intercept	NAFLD	GIANT_2015_WC-and-NAFLD-on-Mahajan_Type2diabetes
NAFLD	Mahajan_Type2diabetes	-0.0412324	0.0219487	-0.0842511	0.0017864	0.0603027			43	Multivariable Egger Intercept	NAFLD	GIANT_2015_WC-and-NAFLD-on-Mahajan_Type2diabetes
GIANT_2015_WC	van_der_Harst_CAD	0.30144	0.08659	0.131726	0.471153	0.000499121	297.657	1.14716e-40	43	Multivariable IVM	none	GIANT_2015_WC-and-NAFLD-on-van_der_Harst_CAD
NAFLD	van_der_Harst_CAD	0.0134576	0.0509477	-0.0863981	0.113313	0.791668	297.657	1.14716e-40	43	Multivariable IVM	none	GIANT_2015_WC-and-NAFLD-on-van_der_Harst_CAD
GIANT_2015_WC	van_der_Harst_CAD	0.388612	0.0563552	0.278158	0.499066	5.35789e-12			43	Multivariable Median	none	GIANT_2015_WC-and-NAFLD-on-van_der_Harst_CAD
NAFLD	van_der_Harst_CAD	-0.0765978	0.044837	-0.164477	0.0112812	0.0875697			43	Multivariable Median	none	GIANT_2015_WC-and-NAFLD-on-van_der_Harst_CAD
GIANT_2015_WC	van_der_Harst_CAD	0.433165	0.0371319	0.360388	0.505942	1.91127e-31			43	Multivariable Lasso	none	GIANT_2015_WC-and-NAFLD-on-van_der_Harst_CAD
NAFLD	van_der_Harst_CAD	-0.0804716	0.0210487	-0.121726	-0.0392169	0.000131779			43	Multivariable Lasso	none	GIANT_2015_WC-and-NAFLD-on-van_der_Harst_CAD
GIANT_2015_WC	van_der_Harst_CAD	0.47405	0.223076	0.0368296	0.91127	0.0335814	292.495	3.95344e-40	43	Multivariable Egger	none	GIANT_2015_WC-and-NAFLD-on-van_der_Harst_CAD
NAFLD	van_der_Harst_CAD	-0.00163304	0.0541947	-0.107853	0.104587	0.975961	292.495	3.95344e-40	43	Multivariable Egger	none	GIANT_2015_WC-and-NAFLD-on-van_der_Harst_CAD
GIANT_2015_WC	van_der_Harst_CAD	-0.00519797	0.00618697	-0.0173242	0.00692828	0.400826			43	Multivariable Egger Intercept	none	GIANT_2015_WC-and-NAFLD-on-van_der_Harst_CAD
NAFLD	van_der_Harst_CAD	-0.00519797	0.00618697	-0.0173242	0.00692828	0.400826			43	Multivariable Egger Intercept	none	GIANT_2015_WC-and-NAFLD-on-van_der_Harst_CAD
GIANT_2015_WC	van_der_Harst_CAD	0.30144	0.08659	0.131726	0.471153	0.000499121	297.657	1.14716e-40	43	Multivariable IVM	GIANT_2015_WC	GIANT_2015_WC-and-NAFLD-on-van_der_Harst_CAD
NAFLD	van_der_Harst_CAD	0.0134576	0.0509477	-0.0863981	0.113313	0.791668	297.657	1.14716e-40	43	Multivariable IVM	GIANT_2015_WC	GIANT_2015_WC-and-NAFLD-on-van_der_Harst_CAD
GIANT_2015_WC	van_der_Harst_CAD	0.388612	0.0563552	0.278158	0.499066	5.35789e-12			43	Multivariable Median	GIANT_2015_WC	GIANT_2015_WC-and-NAFLD-on-van_der_Harst_CAD
NAFLD	van_der_Harst_CAD	-0.0765978	0.044837	-0.164477	0.0112812	0.0875697			43	Multivariable Median	GIANT_2015_WC	GIANT_2015_WC-and-NAFLD-on-van_der_Harst_CAD
GIANT_2015_WC	van_der_Harst_CAD	0.433165	0.0371319	0.360388	0.505942	1.91127e-31			43	Multivariable Lasso	GIANT_2015_WC	GIANT_2015_WC-and-NAFLD-on-van_der_Harst_CAD
NAFLD	van_der_Harst_CAD	-0.0804716	0.0210487	-0.121726	-0.0392169	0.000131779			43	Multivariable Lasso	GIANT_2015_WC	GIANT_2015_WC-and-NAFLD-on-van_der_Harst_CAD
GIANT_2015_WC	van_der_Harst_CAD	0.47405	0.223076	0.0368296	0.91127	0.0335814	292.495	3.95344e-40	43	Multivariable Egger	GIANT_2015_WC	GIANT_2015_WC-and-NAFLD-on-van_der_Harst_CAD
NAFLD	van_der_Harst_CAD	-0.00163304	0.0541947	-0.107853	0.104587	0.975961	292.495	3.95344e-40	43	Multivariable Egger	GIANT_2015_WC	GIANT_2015_WC-and-NAFLD-on-van_der_Harst_CAD
GIANT_2015_WC	van_der_Harst_CAD	-0.00519797	0.00618697	-0.0173242	0.00692828	0.400826			43	Multivariable Egger Intercept	GIANT_2015_WC	GIANT_2015_WC-and-NAFLD-on-van_der_Harst_CAD
NAFLD	van_der_Harst_CAD	-0.00519797	0.00618697	-0.0173242	0.00692828	0.400826			43	Multivariable Egger Intercept	GIANT_2015_WC	GIANT_2015_WC-and-NAFLD-on-van_der_Harst_CAD
GIANT_2015_WC	van_der_Harst_CAD	0.259341	0.104282	0.054951	0.463731	0.0128859	427.67	7.54468e-66	43	Multivariable IVM	NAFLD	GIANT_2015_WC-and-NAFLD-on-van_der_Harst_CAD
NAFLD	van_der_Harst_CAD	-0.048057	0.0591083	-0.163907	0.0677931	0.416199	427.67	7.54468e-66	43	Multivariable IVM	NAFLD	GIANT_2015_WC-and-NAFLD-on-van_der_Harst_CAD
GIANT_2015_WC	van_der_Harst_CAD	0.383282	0.0544109	0.276639	0.489926	1.86505e-12			43	Multivariable Median	NAFLD	GIANT_2015_WC-and-NAFLD-on-van_der_Harst_CAD
NAFLD	van_der_Harst_CAD	-0.0766402	0.0377605	-0.15065	-0.00263096	0.0423933			43	Multivariable Median	NAFLD	GIANT_2015_WC-and-NAFLD-on-van_der_Harst_CAD
GIANT_2015_WC	van_der_Harst_CAD	0.410611	0.0369581	0.338174	0.483048	1.11948e-28			43	Multivariable Lasso	NAFLD	GIANT_2015_WC-and-NAFLD-on-van_der_Harst_CAD
NAFLD	van_der_Harst_CAD	-0.0826265	0.0210419	-0.123868	-0.0413852	8.60973e-05			43	Multivariable Lasso	NAFLD	GIANT_2015_WC-and-NAFLD-on-van_der_Harst_CAD
GIANT_2015_WC	van_der_Harst_CAD	0.428273	0.268575	-0.0981237	0.95467	0.110798	422.735	2.16592e-65	43	Multivariable Egger	NAFLD	GIANT_2015_WC-and-NAFLD-on-van_der_Harst_CAD
NAFLD	van_der_Harst_CAD	-0.0627796	0.0632771	-0.1868	0.0612412	0.32113	422.735	2.16592e-65	43	Multivariable Egger	NAFLD	GIANT_2015_WC-and-NAFLD-on-van_der_Harst_CAD
GIANT_2015_WC	van_der_Harst_CAD	-0.00508326	0.00743877	-0.019663	0.00949645	0.494387			43	Multivariable Egger Intercept	NAFLD	GIANT_2015_WC-and-NAFLD-on-van_der_Harst_CAD
NAFLD	van_der_Harst_CAD	-0.00508326	0.00743877	-0.019663	0.00949645	0.494387			43	Multivariable Egger Intercept	NAFLD	GIANT_2015_WC-and-NAFLD-on-van_der_Harst_CAD
GIANT_2015_WC	Scott_Type2Diabetes	0.692401	0.311713	0.0814538	1.30335	0.0263324	716.969	2.60391e-124	43	Multivariable IVM	none	GIANT_2015_WC-and-NAFLD-on-Scott_Type2Diabetes
NAFLD	Scott_Type2Diabetes	0.119265	0.167412	-0.208858	0.447387	0.476217	716.969	2.60391e-124	43	Multivariable IVM	none	GIANT_2015_WC-and-NAFLD-on-Scott_Type2Diabetes
GIANT_2015_WC	Scott_Type2Diabetes	0.904243	0.138082	0.633608	1.17488	5.80734e-11			43	Multivariable Median	none	GIANT_2015_WC-and-NAFLD-on-Scott_Type2Diabetes
NAFLD	Scott_Type2Diabetes	0.204257	0.0683206	0.0703514	0.338163	0.00279262			43	Multivariable Median	none	GIANT_2015_WC-and-NAFLD-on-Scott_Type2Diabetes
GIANT_2015_WC	Scott_Type2Diabetes	0.995374	0.0902587	0.81847	1.17228	2.79974e-28			43	Multivariable Lasso	none	GIANT_2015_WC-and-NAFLD-on-Scott_Type2Diabetes
NAFLD	Scott_Type2Diabetes	0.176537	0.0415812	0.0950391	0.258034	2.18017e-05			43	Multivariable Lasso	none	GIANT_2015_WC-and-NAFLD-on-Scott_Type2Diabetes
GIANT_2015_WC	Scott_Type2Diabetes	2.22228	0.752535	0.747342	3.69723	0.00314637	638.714	6.72509e-109	43	Multivariable Egger	none	GIANT_2015_WC-and-NAFLD-on-Scott_Type2Diabetes
NAFLD	Scott_Type2Diabetes	-0.0306976	0.173726	-0.371195	0.3098	0.859743	638.714	6.72509e-109	43	Multivariable Egger	none	GIANT_2015_WC-and-NAFLD-on-Scott_Type2Diabetes
GIANT_2015_WC	Scott_Type2Diabetes	-0.0467513	0.0211184	-0.0881425	-0.00536001	0.0268445			43	Multivariable Egger Intercept	none	GIANT_2015_WC-and-NAFLD-on-Scott_Type2Diabetes
NAFLD	Scott_Type2Diabetes	-0.0467513	0.0211184	-0.0881425	-0.00536001	0.0268445			43	Multivariable Egger Intercept	none	GIANT_2015_WC-and-NAFLD-on-Scott_Type2Diabetes
GIANT_2015_WC	Scott_Type2Diabetes	0.692401	0.311713	0.0814538	1.30335	0.0263324	716.969	2.60391e-124	43	Multivariable IVM	GIANT_2015_WC	GIANT_2015_WC-and-NAFLD-on-Scott_Type2Diabetes
NAFLD	Scott_Type2Diabetes	0.119265	0.167412	-0.208858	0.447387	0.476217	716.969	2.60391e-124	43	Multivariable IVM	GIANT_2015_WC	GIANT_2015_WC-and-NAFLD-on-Scott_Type2Diabetes
GIANT_2015_WC	Scott_Type2Diabetes	0.904243	0.138082	0.633608	1.17488	5.80734e-11			43	Multivariable Median	GIANT_2015_WC	GIANT_2015_WC-and-NAFLD-on-Scott_Type2Diabetes
NAFLD	Scott_Type2Diabetes	0.204257	0.0683206	0.0703514	0.338163	0.00279262			43	Multivariable Median	GIANT_2015_WC	GIANT_2015_WC-and-NAFLD-on-Scott_Type2Diabetes
GIANT_2015_WC	Scott_Type2Diabetes	0.995374	0.0902587	0.81847	1.17228	2.79974e-28			43	Multivariable Lasso	GIANT_2015_WC	GIANT_2015_WC-and-NAFLD-on-Scott_Type2Diabetes
NAFLD	Scott_Type2Diabetes	0.176537	0.0415812	0.0950391	0.258034	2.18017e-05			43	Multivariable Lasso	GIANT_2015_WC	GIANT_2015_WC-and-NAFLD-on-Scott_Type2Diabetes
GIANT_2015_WC	Scott_Type2Diabetes	2.22228	0.752535	0.747342	3.69723	0.00314637	638.714	6.72509e-109	43	Multivariable Egger	GIANT_2015_WC	GIANT_2015_WC-and-NAFLD-on-Scott_Type2Diabetes
NAFLD	Scott_Type2Diabetes	-0.0306976	0.173726	-0.371195	0.3098	0.859743	638.714	6.72509e-109	43	Multivariable Egger	GIANT_2015_WC	GIANT_2015_WC-and-NAFLD-on-Scott_Type2Diabetes
GIANT_2015_WC	Scott_Type2Diabetes	-0.0467513	0.0211184	-0.0881425	-0.00536001	0.0268445			43	Multivariable Egger Intercept	GIANT_2015_WC	GIANT_2015_WC-and-NAFLD-on-Scott_Type2Diabetes
NAFLD	Scott_Type2Diabetes	-0.0467513	0.0211184	-0.0881425	-0.00536001	0.0268445			43	Multivariable Egger Intercept	GIANT_2015_WC	GIANT_2015_WC-and-NAFLD-on-Scott_Type2Diabetes
GIANT_2015_WC	Scott_Type2Diabetes	0.763535	0.311852	0.152317	1.37475	0.0143495	709.715	8.03662e-123	43	Multivariable IVM	NAFLD	GIANT_2015_WC-and-NAFLD-on-Scott_Type2Diabetes
NAFLD	Scott_Type2Diabetes	0.163532	0.162093	-0.154163	0.481228	0.313032	709.715	8.03662e-123	43	Multivariable IVM	NAFLD	GIANT_2015_WC-and-NAFLD-on-Scott_Type2Diabetes
GIANT_2015_WC	Scott_Type2Diabetes	0.904335	0.136086	0.637612	1.17106	3.02527e-11			43	Multivariable Median	NAFLD	GIANT_2015_WC-and-NAFLD-on-Scott_Type2Diabetes
NAFLD	Scott_Type2Diabetes	0.204712	0.0607779	0.085589	0.323834	0.000756636			43	Multivariable Median	NAFLD	GIANT_2015_WC-and-NAFLD-on-Scott_Type2Diabetes
GIANT_2015_WC	Scott_Type2Diabetes	0.995374	0.0902587	0.81847	1.17228	2.79974e-28			43	Multivariable Lasso	NAFLD	GIANT_2015_WC-and-NAFLD-on-Scott_Type2Diabetes
NAFLD	Scott_Type2Diabetes	0.176537	0.0415812	0.0950391	0.258034	2.18017e-05			43	Multivariable Lasso	NAFLD	GIANT_2015_WC-and-NAFLD-on-Scott_Type2Diabetes
GIANT_2015_WC	Scott_Type2Diabetes	2.28929	0.749824	0.819666	3.75892	0.00226485	632.026	1.56132e-107	43	Multivariable Egger	NAFLD	GIANT_2015_WC-and-NAFLD-on-Scott_Type2Diabetes
NAFLD	Scott_Type2Diabetes	0.0156638	0.168612	-0.314809	0.346136	0.925984	632.026	1.56132e-107	43	Multivariable Egger	NAFLD	GIANT_2015_WC-and-NAFLD-on-Scott_Type2Diabetes
GIANT_2015_WC	Scott_Type2Diabetes	-0.0465763	0.021005	-0.0877453	-0.00540721	0.0265965			43	Multivariable Egger Intercept	NAFLD	GIANT_2015_WC-and-NAFLD-on-Scott_Type2Diabetes
NAFLD	Scott_Type2Diabetes	-0.0465763	0.021005	-0.0877453	-0.00540721	0.0265965			43	Multivariable Egger Intercept	NAFLD	GIANT_2015_WC-and-NAFLD-on-Scott_Type2Diabetes
GIANT_2015_WC	Nikpay_CAD	0.412003	0.108557	0.199236	0.62477	0.000147472	146.917	7.64684e-14	43	Multivariable IVM	none	GIANT_2015_WC-and-NAFLD-on-Nikpay_CAD
NAFLD	Nikpay_CAD	0.0274567	0.0597516	-0.0896543	0.144568	0.645865	146.917	7.64684e-14	43	Multivariable IVM	none	GIANT_2015_WC-and-NAFLD-on-Nikpay_CAD
GIANT_2015_WC	Nikpay_CAD	0.43833	0.095147	0.251846	0.624815	4.08765e-06			43	Multivariable Median	none	GIANT_2015_WC-and-NAFLD-on-Nikpay_CAD
NAFLD	Nikpay_CAD	0.045686	0.0724703	-0.0963531	0.187725	0.528426			43	Multivariable Median	none	GIANT_2015_WC-and-NAFLD-on-Nikpay_CAD
GIANT_2015_WC	Nikpay_CAD	0.549799	0.0630258	0.426271	0.673327	2.6998e-18			43	Multivariable Lasso	none	GIANT_2015_WC-and-NAFLD-on-Nikpay_CAD
NAFLD	Nikpay_CAD	-0.0510275	0.0345575	-0.118759	0.016704	0.139784			43	Multivariable Lasso	none	GIANT_2015_WC-and-NAFLD-on-Nikpay_CAD
GIANT_2015_WC	Nikpay_CAD	0.863875	0.271227	0.33228	1.39547	0.00144723	135.807	2.34432e-12	43	Multivariable Egger	none	GIANT_2015_WC-and-NAFLD-on-Nikpay_CAD
NAFLD	Nikpay_CAD	-0.0144407	0.0626036	-0.137142	0.10826	0.817572	135.807	2.34432e-12	43	Multivariable Egger	none	GIANT_2015_WC-and-NAFLD-on-Nikpay_CAD
GIANT_2015_WC	Nikpay_CAD	-0.0136483	0.00754482	-0.0284359	0.00113932	0.0704576			43	Multivariable Egger Intercept	none	GIANT_2015_WC-and-NAFLD-on-Nikpay_CAD
NAFLD	Nikpay_CAD	-0.0136483	0.00754482	-0.0284359	0.00113932	0.0704576			43	Multivariable Egger Intercept	none	GIANT_2015_WC-and-NAFLD-on-Nikpay_CAD
GIANT_2015_WC	Nikpay_CAD	0.412003	0.108557	0.199236	0.62477	0.000147472	146.917	7.64684e-14	43	Multivariable IVM	GIANT_2015_WC	GIANT_2015_WC-and-NAFLD-on-Nikpay_CAD
NAFLD	Nikpay_CAD	0.0274567	0.0597516	-0.0896543	0.144568	0.645865	146.917	7.64684e-14	43	Multivariable IVM	GIANT_2015_WC	GIANT_2015_WC-and-NAFLD-on-Nikpay_CAD
GIANT_2015_WC	Nikpay_CAD	0.43833	0.095147	0.251846	0.624815	4.08765e-06			43	Multivariable Median	GIANT_2015_WC	GIANT_2015_WC-and-NAFLD-on-Nikpay_CAD
NAFLD	Nikpay_CAD	0.045686	0.0724703	-0.0963531	0.187725	0.528426			43	Multivariable Median	GIANT_2015_WC	GIANT_2015_WC-and-NAFLD-on-Nikpay_CAD
GIANT_2015_WC	Nikpay_CAD	0.549799	0.0630258	0.426271	0.673327	2.6998e-18			43	Multivariable Lasso	GIANT_2015_WC	GIANT_2015_WC-and-NAFLD-on-Nikpay_CAD
NAFLD	Nikpay_CAD	-0.0510275	0.0345575	-0.118759	0.016704	0.139784			43	Multivariable Lasso	GIANT_2015_WC	GIANT_2015_WC-and-NAFLD-on-Nikpay_CAD
GIANT_2015_WC	Nikpay_CAD	0.863875	0.271227	0.33228	1.39547	0.00144723	135.807	2.34432e-12	43	Multivariable Egger	GIANT_2015_WC	GIANT_2015_WC-and-NAFLD-on-Nikpay_CAD
NAFLD	Nikpay_CAD	-0.0144407	0.0626036	-0.137142	0.10826	0.817572	135.807	2.34432e-12	43	Multivariable Egger	GIANT_2015_WC	GIANT_2015_WC-and-NAFLD-on-Nikpay_CAD
GIANT_2015_WC	Nikpay_CAD	-0.0136483	0.00754482	-0.0284359	0.00113932	0.0704576			43	Multivariable Egger Intercept	GIANT_2015_WC	GIANT_2015_WC-and-NAFLD-on-Nikpay_CAD
NAFLD	Nikpay_CAD	-0.0136483	0.00754482	-0.0284359	0.00113932	0.0704576			43	Multivariable Egger Intercept	GIANT_2015_WC	GIANT_2015_WC-and-NAFLD-on-Nikpay_CAD
GIANT_2015_WC	Nikpay_CAD	0.363283	0.124954	0.118379	0.608188	0.0036451	192.688	1.60976e-21	43	Multivariable IVM	NAFLD	GIANT_2015_WC-and-NAFLD-on-Nikpay_CAD
NAFLD	Nikpay_CAD	-0.0279125	0.0666217	-0.158489	0.102664	0.675238	192.688	1.60976e-21	43	Multivariable IVM	NAFLD	GIANT_2015_WC-and-NAFLD-on-Nikpay_CAD
GIANT_2015_WC	Nikpay_CAD	0.434648	0.0923245	0.253695	0.6156	2.50374e-06			43	Multivariable Median	NAFLD	GIANT_2015_WC-and-NAFLD-on-Nikpay_CAD
NAFLD	Nikpay_CAD	-0.0373597	0.0627924	-0.160431	0.0857111	0.551862			43	Multivariable Median	NAFLD	GIANT_2015_WC-and-NAFLD-on-Nikpay_CAD
GIANT_2015_WC	Nikpay_CAD	0.534519	0.0636484	0.409771	0.659268	4.54157e-17			43	Multivariable Lasso	NAFLD	GIANT_2015_WC-and-NAFLD-on-Nikpay_CAD
NAFLD	Nikpay_CAD	-0.054184	0.0346062	-0.122011	0.0136429	0.117412			43	Multivariable Lasso	NAFLD	GIANT_2015_WC-and-NAFLD-on-Nikpay_CAD
GIANT_2015_WC	Nikpay_CAD	0.81921	0.313975	0.203829	1.43459	0.00907666	181.401	6.59703e-20	43	Multivariable Egger	NAFLD	GIANT_2015_WC-and-NAFLD-on-Nikpay_CAD
NAFLD	Nikpay_CAD	-0.0698965	0.0706475	-0.208363	0.0685701	0.322482	181.401	6.59703e-20	43	Multivariable Egger	NAFLD	GIANT_2015_WC-and-NAFLD-on-Nikpay_CAD
GIANT_2015_WC	Nikpay_CAD	-0.0137577	0.00872027	-0.0308491	0.00333376	0.114643			43	Multivariable Egger Intercept	NAFLD	GIANT_2015_WC-and-NAFLD-on-Nikpay_CAD
NAFLD	Nikpay_CAD	-0.0137577	0.00872027	-0.0308491	0.00333376	0.114643			43	Multivariable Egger Intercept	NAFLD	GIANT_2015_WC-and-NAFLD-on-Nikpay_CAD

## Sheet: sup tab3. Univariable MR result
outcome	exposure	method	nsnp	b	se	pval	lci	uci	type_of_test
Mahajan_Type2diabetes	BMI_UKB	Inverse variance weighted	454	1.0306	0.0373292	8.8e-168	0.957437	1.10377	Primary analysis
Mahajan_Type2diabetes	BMI_UKB	Weighted mode	454	1.04164	0.100545	1.02943e-22	0.844574	1.23871	Consensus methods
Mahajan_Type2diabetes	BMI_UKB	Weighted median	454	1.03424	0.0377955	7.32271e-165	0.960164	1.10832	Consensus methods
Mahajan_Type2diabetes	BMI_UKB	MR Egger	454	1.11252	0.103294	3.11686e-24	0.910061	1.31497	Pleiotropy test
Mahajan_Type2diabetes	BMI_UKB	Robust adjusted profile score (RAPS)	454	1.09604	0.0315836	7.14359e-264	1.03414	1.15795	Pleiotropy test
Mahajan_Type2diabetes	BMI_UKB	MR-PRESSO (Outlier-corrected)	423	1.07464	0.0285919	9.46954e-137	1.0186	1.13068	Outlier-robust methods
Mahajan_Type2diabetes	BMI_UKB	Contamination mixture	454	1.26071		5.54113e-130	1.20071	1.33071	Pleiotropy test
NAFLD	BMI_UKB	Inverse variance weighted	450	0.510111	0.0549697	1.69702e-20	0.40237	0.617851	Primary analysis
NAFLD	BMI_UKB	Weighted mode	450	0.516911	0.242353	0.0334762	0.0418985	0.991924	Consensus methods
NAFLD	BMI_UKB	Weighted median	450	0.530793	0.0789579	1.78668e-11	0.376035	0.68555	Consensus methods
NAFLD	BMI_UKB	MR Egger	450	0.56642	0.152547	0.000230571	0.267427	0.865412	Pleiotropy test
NAFLD	BMI_UKB	Robust adjusted profile score (RAPS)	450	0.505833	0.0559546	1.56573e-19	0.396162	0.615504	Pleiotropy test
NAFLD	BMI_UKB	MR-PRESSO (Outlier-corrected)	447	0.479326	0.0528763	3.96419e-18	0.375688	0.582963	Outlier-robust methods
NAFLD	BMI_UKB	Contamination mixture	450	0.872231		2.79652e-14	0.632231	1.01223	Pleiotropy test
Nikpay_CAD	BMI_UKB	Inverse variance weighted	453	0.425919	0.0353763	2.19838e-33	0.356581	0.495257	Primary analysis
Nikpay_CAD	BMI_UKB	Weighted mode	453	0.365545	0.10435	0.000505731	0.161018	0.570072	Consensus methods
Nikpay_CAD	BMI_UKB	Weighted median	453	0.392812	0.0513917	2.11425e-14	0.292084	0.493539	Consensus methods
Nikpay_CAD	BMI_UKB	MR Egger	453	0.51986	0.0986664	2.1311e-07	0.326474	0.713247	Pleiotropy test
Nikpay_CAD	BMI_UKB	Robust adjusted profile score (RAPS)	453	0.446738	0.0339354	1.40763e-39	0.380224	0.513251	Pleiotropy test
Nikpay_CAD	BMI_UKB	MR-PRESSO (Outlier-corrected)	449	0.442845	0.0324345	9.85792e-36	0.379274	0.506417	Outlier-robust methods
Nikpay_CAD	BMI_UKB	Contamination mixture	453	0.554677		4.67222e-24	0.474677	0.714677	Pleiotropy test
Scott_Type2Diabetes	BMI_UKB	Inverse variance weighted	455	0.856626	0.0504026	8.83797e-65	0.757837	0.955415	Primary analysis
Scott_Type2Diabetes	BMI_UKB	Weighted mode	455	1.09151	0.205592	1.72767e-07	0.688545	1.49447	Consensus methods
Scott_Type2Diabetes	BMI_UKB	Weighted median	455	0.978782	0.0644757	4.75055e-52	0.85241	1.10515	Consensus methods
Scott_Type2Diabetes	BMI_UKB	MR Egger	455	1.11584	0.139448	1.03727e-14	0.842518	1.38916	Pleiotropy test
Scott_Type2Diabetes	BMI_UKB	Robust adjusted profile score (RAPS)	455	0.885399	0.0477999	1.34596e-76	0.791711	0.979087	Pleiotropy test
Scott_Type2Diabetes	BMI_UKB	MR-PRESSO (Outlier-corrected)	444	0.874653	0.0459247	1.61602e-59	0.784641	0.964665	Outlier-robust methods
Scott_Type2Diabetes	BMI_UKB	Contamination mixture	455	1.16532		9.37957e-54	1.05532	1.27532	Pleiotropy test
van_der_Harst_CAD	BMI_UKB	Inverse variance weighted	454	0.439364	0.0276154	5.39497e-57	0.385238	0.49349	Primary analysis
van_der_Harst_CAD	BMI_UKB	Weighted mode	454	0.344336	0.0613463	3.47033e-08	0.224097	0.464575	Consensus methods
van_der_Harst_CAD	BMI_UKB	Weighted median	454	0.419578	0.0305626	6.85609e-43	0.359675	0.479481	Consensus methods
van_der_Harst_CAD	BMI_UKB	MR Egger	454	0.327162	0.0759246	2.01344e-05	0.17835	0.475975	Pleiotropy test
van_der_Harst_CAD	BMI_UKB	Robust adjusted profile score (RAPS)	454	0.465834	0.0255319	2.26083e-74	0.415791	0.515877	Pleiotropy test
van_der_Harst_CAD	BMI_UKB	MR-PRESSO (Outlier-corrected)	439	0.439322	0.0228891	5.0018e-60	0.39446	0.484185	Outlier-robust methods
van_der_Harst_CAD	BMI_UKB	Contamination mixture	454	0.63741		4.78285e-54	0.56741	0.72741	Pleiotropy test
Mahajan_Type2diabetes	GIANT_2015_BMI	Inverse variance weighted	68	0.796164	0.189115	2.55428e-05	0.425499	1.16683	Primary analysis
Mahajan_Type2diabetes	GIANT_2015_BMI	Weighted mode	68	1.05159	0.15599	4.38483e-09	0.745852	1.35733	Consensus methods
Mahajan_Type2diabetes	GIANT_2015_BMI	Weighted median	68	0.991018	0.0596352	5.16382e-62	0.874132	1.1079	Consensus methods
Mahajan_Type2diabetes	GIANT_2015_BMI	MR Egger	68	1.23351	0.462788	0.00965817	0.326448	2.14058	Pleiotropy test
Mahajan_Type2diabetes	GIANT_2015_BMI	Robust adjusted profile score (RAPS)	68	0.959028	0.0428506	6.06834e-111	0.87504	1.04301	Pleiotropy test
Mahajan_Type2diabetes	GIANT_2015_BMI	MR-PRESSO (Outlier-corrected)	61	0.900176	0.0505183	1.21347e-25	0.80116	0.999192	Outlier-robust methods
Mahajan_Type2diabetes	GIANT_2015_BMI	Contamination mixture	68	0.99188		2.96432e-37	0.91188	1.07188	Pleiotropy test
NAFLD	GIANT_2015_BMI	Inverse variance weighted	68	0.417025	0.0966699	1.60396e-05	0.227552	0.606498	Primary analysis
NAFLD	GIANT_2015_BMI	Weighted mode	68	0.611052	0.195313	0.00260026	0.228238	0.993867	Consensus methods
NAFLD	GIANT_2015_BMI	Weighted median	68	0.467774	0.128188	0.00026313	0.216526	0.719022	Consensus methods
NAFLD	GIANT_2015_BMI	MR Egger	68	0.469164	0.237979	0.0528664	0.00272626	0.935602	Pleiotropy test
NAFLD	GIANT_2015_BMI	Robust adjusted profile score (RAPS)	68	0.401463	0.105925	0.000150602	0.19385	0.609076	Pleiotropy test
NAFLD	GIANT_2015_BMI	MR-PRESSO (Outlier-corrected)	68	0.417025	0.0966699	5.39907e-05	0.227552	0.606498	Outlier-robust methods
NAFLD	GIANT_2015_BMI	Contamination mixture	68	0.686036		0.00996202	0.406036	0.976036	Pleiotropy test
Nikpay_CAD	GIANT_2015_BMI	Inverse variance weighted	68	0.421923	0.0567001	9.96951e-14	0.31079	0.533055	Primary analysis
Nikpay_CAD	GIANT_2015_BMI	Weighted mode	68	0.352241	0.0944237	0.000395841	0.16717	0.537311	Consensus methods
Nikpay_CAD	GIANT_2015_BMI	Weighted median	68	0.36511	0.0749805	1.11933e-06	0.218149	0.512072	Consensus methods
Nikpay_CAD	GIANT_2015_BMI	MR Egger	68	0.457801	0.139883	0.00169684	0.183629	0.731972	Pleiotropy test
Nikpay_CAD	GIANT_2015_BMI	Robust adjusted profile score (RAPS)	68	0.432346	0.0544031	1.90952e-15	0.325716	0.538977	Pleiotropy test
Nikpay_CAD	GIANT_2015_BMI	MR-PRESSO (Outlier-corrected)	67	0.440535	0.0526655	5.8929e-12	0.337311	0.543759	Outlier-robust methods
Nikpay_CAD	GIANT_2015_BMI	Contamination mixture	68	0.477865		4.00232e-10	0.357865	0.597865	Pleiotropy test
Scott_Type2Diabetes	GIANT_2015_BMI	Inverse variance weighted	68	0.780644	0.192092	4.82569e-05	0.404144	1.15714	Primary analysis
Scott_Type2Diabetes	GIANT_2015_BMI	Weighted mode	68	0.896773	0.171386	1.80701e-06	0.560857	1.23269	Consensus methods
Scott_Type2Diabetes	GIANT_2015_BMI	Weighted median	68	0.920431	0.103891	8.02957e-19	0.716805	1.12406	Consensus methods
Scott_Type2Diabetes	GIANT_2015_BMI	MR Egger	68	1.37128	0.461079	0.00410103	0.467564	2.27499	Pleiotropy test
Scott_Type2Diabetes	GIANT_2015_BMI	Robust adjusted profile score (RAPS)	68	0.896916	0.086545	3.63106e-25	0.727288	1.06654	Pleiotropy test
Scott_Type2Diabetes	GIANT_2015_BMI	MR-PRESSO (Outlier-corrected)	64	0.819594	0.0838099	2.97169e-14	0.655326	0.983861	Outlier-robust methods
Scott_Type2Diabetes	GIANT_2015_BMI	Contamination mixture	68	1.00795		1.61626e-18	0.847949	1.14795	Pleiotropy test
van_der_Harst_CAD	GIANT_2015_BMI	Inverse variance weighted	68	0.31523	0.0417796	4.52054e-14	0.233342	0.397118	Primary analysis
van_der_Harst_CAD	GIANT_2015_BMI	Weighted mode	68	0.312067	0.0472842	7.82771e-09	0.21939	0.404744	Consensus methods
van_der_Harst_CAD	GIANT_2015_BMI	Weighted median	68	0.293092	0.041487	1.61003e-12	0.211777	0.374406	Consensus methods
van_der_Harst_CAD	GIANT_2015_BMI	MR Egger	68	0.204414	0.102322	0.0498676	0.00386299	0.404965	Pleiotropy test
van_der_Harst_CAD	GIANT_2015_BMI	Robust adjusted profile score (RAPS)	68	0.313754	0.0441525	1.1933e-12	0.227215	0.400293	Pleiotropy test
van_der_Harst_CAD	GIANT_2015_BMI	MR-PRESSO (Outlier-corrected)	65	0.312136	0.0347376	5.99452e-13	0.244051	0.380222	Outlier-robust methods
van_der_Harst_CAD	GIANT_2015_BMI	Contamination mixture	68	0.351667		2.73274e-13	0.291667	0.461667	Pleiotropy test
Mahajan_Type2diabetes	GIANT_2015_WC	Inverse variance weighted	41	0.861911	0.303137	0.00446485	0.267762	1.45606	Primary analysis
Mahajan_Type2diabetes	GIANT_2015_WC	Weighted mode	41	1.15829	0.13928	2.96131e-10	0.885296	1.43127	Consensus methods
Mahajan_Type2diabetes	GIANT_2015_WC	Weighted median	41	1.12113	0.0813242	3.09883e-43	0.961731	1.28052	Consensus methods
Mahajan_Type2diabetes	GIANT_2015_WC	MR Egger	41	2.04869	0.786271	0.0129189	0.507599	3.58978	Pleiotropy test
Mahajan_Type2diabetes	GIANT_2015_WC	Robust adjusted profile score (RAPS)	41	1.1592	0.069321	9.02441e-63	1.02333	1.29507	Pleiotropy test
Mahajan_Type2diabetes	GIANT_2015_WC	MR-PRESSO (Outlier-corrected)	34	1.03493	0.0756239	3.70386e-15	0.886711	1.18316	Outlier-robust methods
Mahajan_Type2diabetes	GIANT_2015_WC	Contamination mixture	41	1.21636		6.62511e-25	1.02636	1.31636	Pleiotropy test
NAFLD	GIANT_2015_WC	Inverse variance weighted	41	0.552817	0.114525	1.38563e-06	0.328349	0.777285	Primary analysis
NAFLD	GIANT_2015_WC	Weighted mode	41	0.727969	0.214903	0.00159476	0.30676	1.14918	Consensus methods
NAFLD	GIANT_2015_WC	Weighted median	41	0.621192	0.151004	3.89308e-05	0.325223	0.91716	Consensus methods
NAFLD	GIANT_2015_WC	MR Egger	41	0.53543	0.306785	0.0888093	-0.0658688	1.13673	Pleiotropy test
NAFLD	GIANT_2015_WC	Robust adjusted profile score (RAPS)	41	0.526042	0.120831	1.33963e-05	0.289213	0.762871	Pleiotropy test
NAFLD	GIANT_2015_WC	MR-PRESSO (Outlier-corrected)	41	0.552817	0.114525	2.05109e-05	0.328349	0.777285	Outlier-robust methods
NAFLD	GIANT_2015_WC	Contamination mixture	41	0.806426		0.0384895	0.0464263	1.20643	Pleiotropy test
Nikpay_CAD	GIANT_2015_WC	Inverse variance weighted	41	0.490357	0.0880916	2.59995e-08	0.317697	0.663016	Primary analysis
Nikpay_CAD	GIANT_2015_WC	Weighted mode	41	0.426312	0.118804	0.000897623	0.193456	0.659168	Consensus methods
Nikpay_CAD	GIANT_2015_WC	Weighted median	41	0.449886	0.0867429	2.14365e-07	0.27987	0.619902	Consensus methods
Nikpay_CAD	GIANT_2015_WC	MR Egger	41	0.7274	0.234351	0.0035472	0.268073	1.18673	Pleiotropy test
Nikpay_CAD	GIANT_2015_WC	Robust adjusted profile score (RAPS)	41	0.548267	0.0609627	2.39515e-19	0.42878	0.667754	Pleiotropy test
Nikpay_CAD	GIANT_2015_WC	MR-PRESSO (Outlier-corrected)	38	0.508371	0.0624875	9.22475e-10	0.385895	0.630846	Outlier-robust methods
Nikpay_CAD	GIANT_2015_WC	Contamination mixture	41	0.548337		2.68978e-10	0.398337	0.658337	Pleiotropy test
Scott_Type2Diabetes	GIANT_2015_WC	Inverse variance weighted	41	0.837717	0.297247	0.00482853	0.255114	1.42032	Primary analysis
Scott_Type2Diabetes	GIANT_2015_WC	Weighted mode	41	1.42478	0.180848	1.15653e-09	1.07032	1.77924	Consensus methods
Scott_Type2Diabetes	GIANT_2015_WC	Weighted median	41	1.1627	0.125521	1.98866e-20	0.916676	1.40872	Consensus methods
Scott_Type2Diabetes	GIANT_2015_WC	MR Egger	41	2.23325	0.749232	0.00493282	0.764751	3.70174	Pleiotropy test
Scott_Type2Diabetes	GIANT_2015_WC	Robust adjusted profile score (RAPS)	41	1.06857	0.0961836	1.12583e-28	0.880048	1.25709	Pleiotropy test
Scott_Type2Diabetes	GIANT_2015_WC	MR-PRESSO (Outlier-corrected)	37	0.971767	0.104544	4.2163e-11	0.766862	1.17667	Outlier-robust methods
Scott_Type2Diabetes	GIANT_2015_WC	Contamination mixture	41	1.12		2.68507e-16	0.96	1.29	Pleiotropy test
van_der_Harst_CAD	GIANT_2015_WC	Inverse variance weighted	41	0.350853	0.0638887	3.98255e-08	0.225631	0.476075	Primary analysis
van_der_Harst_CAD	GIANT_2015_WC	Weighted mode	41	0.393138	0.0638394	2.83178e-07	0.268012	0.518263	Consensus methods
van_der_Harst_CAD	GIANT_2015_WC	Weighted median	41	0.35346	0.0521574	1.22861e-11	0.251232	0.455689	Consensus methods
van_der_Harst_CAD	GIANT_2015_WC	MR Egger	41	0.314144	0.173653	0.0781599	-0.0262164	0.654504	Pleiotropy test
van_der_Harst_CAD	GIANT_2015_WC	Robust adjusted profile score (RAPS)	41	0.357894	0.0726225	8.30136e-07	0.215554	0.500234	Pleiotropy test
van_der_Harst_CAD	GIANT_2015_WC	MR-PRESSO (Outlier-corrected)	36	0.369366	0.0446727	9.55999e-10	0.281807	0.456924	Outlier-robust methods
van_der_Harst_CAD	GIANT_2015_WC	Contamination mixture	41	0.487368		2.80171e-11	0.347368	0.567368	Pleiotropy test
BMI_UKB	Mahajan_Type2diabetes	Inverse variance weighted	203	0.0529053	0.0142851	0.000212612	0.0249066	0.080904	Primary analysis
BMI_UKB	Mahajan_Type2diabetes	Weighted mode	203	-0.0383333	0.00568083	1.55198e-10	-0.0494677	-0.0271989	Consensus methods
BMI_UKB	Mahajan_Type2diabetes	Weighted median	203	-0.0266034	0.00633864	2.70454e-05	-0.0390271	-0.0141796	Consensus methods
BMI_UKB	Mahajan_Type2diabetes	MR Egger	203	-0.0596584	0.0313291	0.0583062	-0.121064	0.00174669	Pleiotropy test
BMI_UKB	Mahajan_Type2diabetes	Robust adjusted profile score (RAPS)	203	0.0142204	0.0082759	0.0857446	-0.00200041	0.0304411	Pleiotropy test
BMI_UKB	Mahajan_Type2diabetes	MR-PRESSO (Outlier-corrected)	122	0.0351928	0.00646012	2.72706e-07	0.0225309	0.0478546	Outlier-robust methods
BMI_UKB	Mahajan_Type2diabetes	Contamination mixture	203	-0.0319173		0.00423206	-0.0419173	-0.0019173	Pleiotropy test
GIANT_2015_BMI	Mahajan_Type2diabetes	Inverse variance weighted	181	0.0207285	0.0167033	0.214612	-0.01201	0.0534671	Primary analysis
GIANT_2015_BMI	Mahajan_Type2diabetes	Weighted mode	181	-0.0732638	0.00993231	5.75394e-12	-0.0927311	-0.0537964	Consensus methods
GIANT_2015_BMI	Mahajan_Type2diabetes	Weighted median	181	-0.0613799	0.00988163	5.24745e-10	-0.0807479	-0.0420119	Consensus methods
GIANT_2015_BMI	Mahajan_Type2diabetes	MR Egger	181	-0.0962492	0.0367243	0.00952486	-0.168229	-0.0242697	Pleiotropy test
GIANT_2015_BMI	Mahajan_Type2diabetes	Robust adjusted profile score (RAPS)	181	-0.0213802	0.0106163	0.0440208	-0.0421882	-0.000572142	Pleiotropy test
GIANT_2015_BMI	Mahajan_Type2diabetes	MR-PRESSO (Outlier-corrected)	144	-0.000924306	0.0100056	0.926526	-0.0205352	0.0186866	Outlier-robust methods
GIANT_2015_BMI	Mahajan_Type2diabetes	Contamination mixture	181	-0.0635135		3.8734e-06	-0.0735135	-0.0435135	Pleiotropy test
GIANT_2015_WC	Mahajan_Type2diabetes	Inverse variance weighted	180	0.0236406	0.0153763	0.124178	-0.00649696	0.0537781	Primary analysis
GIANT_2015_WC	Mahajan_Type2diabetes	Weighted mode	180	-0.0549144	0.0105218	4.94395e-07	-0.0755371	-0.0342917	Consensus methods
GIANT_2015_WC	Mahajan_Type2diabetes	Weighted median	180	-0.041281	0.0103755	6.92903e-05	-0.0616169	-0.0209451	Consensus methods
GIANT_2015_WC	Mahajan_Type2diabetes	MR Egger	180	-0.0776015	0.0338131	0.0228991	-0.143875	-0.0113279	Pleiotropy test
GIANT_2015_WC	Mahajan_Type2diabetes	Robust adjusted profile score (RAPS)	180	-0.0102936	0.0106553	0.334012	-0.0311779	0.0105906	Pleiotropy test
GIANT_2015_WC	Mahajan_Type2diabetes	MR-PRESSO (Outlier-corrected)	153	0.0016621	0.00950577	0.861429	-0.0169692	0.0202934	Outlier-robust methods
GIANT_2015_WC	Mahajan_Type2diabetes	Contamination mixture	180	-0.0513514		0.000151817	-0.0613514	-0.0213514	Pleiotropy test
NAFLD	Mahajan_Type2diabetes	Inverse variance weighted	202	0.158723	0.0306405	2.21683e-07	0.0986678	0.218779	Primary analysis
NAFLD	Mahajan_Type2diabetes	Weighted mode	202	-0.0214912	0.0593339	0.717577	-0.137786	0.0948032	Consensus methods
NAFLD	Mahajan_Type2diabetes	Weighted median	202	0.0773153	0.0356206	0.0299674	0.00749891	0.147132	Consensus methods
NAFLD	Mahajan_Type2diabetes	MR Egger	202	0.0474858	0.0684609	0.488725	-0.0866975	0.181669	Pleiotropy test
NAFLD	Mahajan_Type2diabetes	Robust adjusted profile score (RAPS)	202	0.157303	0.0274954	1.05846e-08	0.103412	0.211194	Pleiotropy test
NAFLD	Mahajan_Type2diabetes	MR-PRESSO (Outlier-corrected)	198	0.169957	0.0274412	3.36406e-09	0.116173	0.223742	Outlier-robust methods
NAFLD	Mahajan_Type2diabetes	Contamination mixture	202	0.141059		0.0418765	0.0110586	0.271059	Pleiotropy test
Nikpay_CAD	Mahajan_Type2diabetes	Inverse variance weighted	203	0.153715	0.0194794	2.99417e-15	0.115535	0.191894	Primary analysis
Nikpay_CAD	Mahajan_Type2diabetes	Weighted mode	203	0.0984946	0.0295651	0.00102725	0.040547	0.156442	Consensus methods
Nikpay_CAD	Mahajan_Type2diabetes	Weighted median	203	0.102227	0.022877	7.87476e-06	0.0573883	0.147066	Consensus methods
Nikpay_CAD	Mahajan_Type2diabetes	MR Egger	203	0.0220999	0.0436738	0.613396	-0.0635007	0.1077	Pleiotropy test
Nikpay_CAD	Mahajan_Type2diabetes	Robust adjusted profile score (RAPS)	203	0.142262	0.0174918	4.18645e-16	0.107978	0.176546	Pleiotropy test
Nikpay_CAD	Mahajan_Type2diabetes	MR-PRESSO (Outlier-corrected)	195	0.149541	0.0158254	1.13152e-17	0.118523	0.180558	Outlier-robust methods
Nikpay_CAD	Mahajan_Type2diabetes	Contamination mixture	203	0.136768		1.4051e-09	0.0967679	0.166768	Pleiotropy test
Scott_Type2Diabetes	Mahajan_Type2diabetes	Inverse variance weighted	203	0.971508	0.0170437	0	0.938103	1.00491	Primary analysis
Scott_Type2Diabetes	Mahajan_Type2diabetes	Weighted mode	203	0.962552	0.0435433	7.90413e-56	0.877207	1.0479	Consensus methods
Scott_Type2Diabetes	Mahajan_Type2diabetes	Weighted median	203	0.964233	0.0339665	2.86387e-177	0.897659	1.03081	Consensus methods
Scott_Type2Diabetes	Mahajan_Type2diabetes	MR Egger	203	0.968924	0.0388813	2.1681e-63	0.892717	1.04513	Pleiotropy test
Scott_Type2Diabetes	Mahajan_Type2diabetes	Robust adjusted profile score (RAPS)	203	0.986612	0.018515	0	0.950323	1.0229	Pleiotropy test
Scott_Type2Diabetes	Mahajan_Type2diabetes	MR-PRESSO (Outlier-corrected)	203	0.971508	0.0170437	1.85367e-126	0.938103	1.00491	Outlier-robust methods
Scott_Type2Diabetes	Mahajan_Type2diabetes	Contamination mixture	203	1.01286		2.04906e-189	0.982857	1.04286	Pleiotropy test
van_der_Harst_CAD	Mahajan_Type2diabetes	Inverse variance weighted	203	0.125981	0.0175137	6.32583e-13	0.0916539	0.160308	Primary analysis
van_der_Harst_CAD	Mahajan_Type2diabetes	Weighted mode	203	0.0759503	0.0206867	0.000308715	0.0354043	0.116496	Consensus methods
van_der_Harst_CAD	Mahajan_Type2diabetes	Weighted median	203	0.0960447	0.013729	2.63796e-12	0.069136	0.122953	Consensus methods
van_der_Harst_CAD	Mahajan_Type2diabetes	MR Egger	203	0.0277972	0.0395346	0.4828	-0.0496907	0.105285	Pleiotropy test
van_der_Harst_CAD	Mahajan_Type2diabetes	Robust adjusted profile score (RAPS)	203	0.11683	0.0141985	1.89836e-16	0.0890012	0.144659	Pleiotropy test
van_der_Harst_CAD	Mahajan_Type2diabetes	MR-PRESSO (Outlier-corrected)	187	0.126962	0.0112315	6.86403e-23	0.104948	0.148975	Outlier-robust methods
van_der_Harst_CAD	Mahajan_Type2diabetes	Contamination mixture	203	0.09625		4.00307e-13	0.07625	0.11625	Pleiotropy test
WC_UKB	Mahajan_Type2diabetes	Inverse variance weighted	203	0.0510911	0.0113743	7.06209e-06	0.0287975	0.0733847	Primary analysis
WC_UKB	Mahajan_Type2diabetes	Weighted mode	203	-0.0112888	0.00516112	0.0298703	-0.0214046	-0.00117301	Consensus methods
WC_UKB	Mahajan_Type2diabetes	Weighted median	203	-0.010174	0.00506292	0.0444836	-0.0200973	-0.000250641	Consensus methods
WC_UKB	Mahajan_Type2diabetes	MR Egger	203	-0.0366385	0.0249856	0.144107	-0.0856103	0.0123334	Pleiotropy test
WC_UKB	Mahajan_Type2diabetes	Robust adjusted profile score (RAPS)	203	0.023023	0.00695448	0.000931183	0.00939226	0.0366538	Pleiotropy test
WC_UKB	Mahajan_Type2diabetes	MR-PRESSO (Outlier-corrected)	134	0.0308777	0.00530148	4.09451e-08	0.0204868	0.0412686	Outlier-robust methods
WC_UKB	Mahajan_Type2diabetes	Contamination mixture	203	-0.000555135		0.885947	-0.0105551	0.00944486	Pleiotropy test
BMI_UKB	NAFLD	Inverse variance weighted	4	-0.0107342	0.0425507	0.800834	-0.0941335	0.0726652	Primary analysis
BMI_UKB	NAFLD	Weighted mode	4	-0.0249839	0.00736757	0.0427413	-0.0394243	-0.0105435	Consensus methods
BMI_UKB	NAFLD	Weighted median	4	-0.0235492	0.00740616	0.00147441	-0.0380653	-0.0090331	Consensus methods
BMI_UKB	NAFLD	MR Egger	4	-0.0288466	0.127304	0.84179	-0.278362	0.220669	Pleiotropy test
BMI_UKB	NAFLD	Robust adjusted profile score (RAPS)	4	-0.0216674	0.019142	0.257664	-0.0591858	0.0158509	Pleiotropy test
BMI_UKB	NAFLD	MR-PRESSO (Outlier-corrected)	4	-0.0107342	0.0425507	0.81713	-0.0941335	0.0726652	Outlier-robust methods
BMI_UKB	NAFLD	Contamination mixture	4	-0.0182413		0.0101256	-0.0382413	-0.00824135	Pleiotropy test
GIANT_2015_BMI	NAFLD	Inverse variance weighted (fixed effects)	3	-0.0100655	0.0139654	0.471065	-0.0374376	0.0173066	Primary analysis
GIANT_2015_BMI	NAFLD	Weighted mode	3	-0.0262783	0.0151795	0.225562	-0.0560301	0.00347357	Consensus methods
GIANT_2015_BMI	NAFLD	Weighted median	3	-0.0263773	0.0149147	0.0769702	-0.0556101	0.00285553	Consensus methods
GIANT_2015_BMI	NAFLD	MR Egger	3	-0.0252542	0.171685	0.907023	-0.361758	0.311249	Pleiotropy test
GIANT_2015_BMI	NAFLD	Robust adjusted profile score (RAPS)	3	0.015255	0.0796235	0.848064	-0.140807	0.171317	Pleiotropy test
GIANT_2015_BMI	NAFLD	Contamination mixture	3	-0.0326679		0.0323026	-0.0526679	-0.00266787	Pleiotropy test
GIANT_2015_WC	NAFLD	Inverse variance weighted (fixed effects)	3	0.0139373	0.015974	0.382937	-0.0173717	0.0452463	Primary analysis
GIANT_2015_WC	NAFLD	Weighted mode	3	-0.00931966	0.0164735	0.62858	-0.0416077	0.0229684	Consensus methods
GIANT_2015_WC	NAFLD	Weighted median	3	-0.00972516	0.0168574	0.564002	-0.0427657	0.0233153	Consensus methods
GIANT_2015_WC	NAFLD	MR Egger	3	-0.0375111	0.190009	0.875916	-0.409928	0.334906	Pleiotropy test
GIANT_2015_WC	NAFLD	Robust adjusted profile score (RAPS)	3	0.0343669	0.0838138	0.681777	-0.129908	0.198642	Pleiotropy test
GIANT_2015_WC	NAFLD	Contamination mixture	3	-0.0146984		0.574651	-0.0346984	0.0153016	Pleiotropy test
Mahajan_Type2diabetes	NAFLD	Inverse variance weighted	4	0.216931	0.0865453	0.0121913	0.0473019	0.386559	Primary analysis
Mahajan_Type2diabetes	NAFLD	Weighted mode	4	0.173127	0.0282359	0.00872337	0.117784	0.228469	Consensus methods
Mahajan_Type2diabetes	NAFLD	Weighted median	4	0.179007	0.0287985	5.10526e-10	0.122562	0.235452	Consensus methods
Mahajan_Type2diabetes	NAFLD	MR Egger	4	0.251018	0.260178	0.436442	-0.258931	0.760967	Pleiotropy test
Mahajan_Type2diabetes	NAFLD	Robust adjusted profile score (RAPS)	4	0.254257	0.0765092	0.000889837	0.104299	0.404215	Pleiotropy test
Mahajan_Type2diabetes	NAFLD	MR-PRESSO (Outlier-corrected)	4	0.216931	0.0865453	0.0872014	0.0473019	0.386559	Outlier-robust methods
Mahajan_Type2diabetes	NAFLD	Contamination mixture	4	0.170882		0.157824	0.120882	0.450882	Pleiotropy test
Nikpay_CAD	NAFLD	Inverse variance weighted	4	-0.0816489	0.142834	0.56757	-0.361604	0.198306	Primary analysis
Nikpay_CAD	NAFLD	Weighted mode	4	-0.0898354	0.0375165	0.0963453	-0.163368	-0.016303	Consensus methods
Nikpay_CAD	NAFLD	Weighted median	4	-0.0907685	0.036207	0.0121785	-0.161734	-0.0198027	Consensus methods
Nikpay_CAD	NAFLD	MR Egger	4	-0.275104	0.402521	0.564874	-1.06404	0.513836	Pleiotropy test
Nikpay_CAD	NAFLD	Robust adjusted profile score (RAPS)	4	-0.154027	0.11565	0.182915	-0.380702	0.0726479	Pleiotropy test
Nikpay_CAD	NAFLD	MR-PRESSO (Outlier-corrected)	2	-0.102691	0.0684355	0.374225	-0.236825	0.0314423	Outlier-robust methods
Nikpay_CAD	NAFLD	Contamination mixture	4	-0.102774		0.000142187	-0.442774	0.247226	Pleiotropy test
Scott_Type2Diabetes	NAFLD	Inverse variance weighted	4	0.245416	0.111772	0.028114	0.0263437	0.464488	Primary analysis
Scott_Type2Diabetes	NAFLD	Weighted mode	4	0.203515	0.0467017	0.0223315	0.11198	0.29505	Consensus methods
Scott_Type2Diabetes	NAFLD	Weighted median	4	0.208118	0.0462407	6.77095e-06	0.117487	0.29875	Consensus methods
Scott_Type2Diabetes	NAFLD	MR Egger	4	0.210799	0.334424	0.592894	-0.444672	0.86627	Pleiotropy test
Scott_Type2Diabetes	NAFLD	Robust adjusted profile score (RAPS)	4	0.270432	0.102148	0.00811007	0.070222	0.470643	Pleiotropy test
Scott_Type2Diabetes	NAFLD	MR-PRESSO (Outlier-corrected)	3	0.194769	0.0541049	0.0692475	0.0887235	0.300815	Outlier-robust methods
Scott_Type2Diabetes	NAFLD	Contamination mixture	4	0.190485		0.00154239	0.100485	0.430485	Pleiotropy test
van_der_Harst_CAD	NAFLD	Inverse variance weighted	4	-0.0871741	0.153052	0.568969	-0.387156	0.212808	Primary analysis
van_der_Harst_CAD	NAFLD	Weighted mode	4	-0.101587	0.0214599	0.0178701	-0.143648	-0.0595254	Consensus methods
van_der_Harst_CAD	NAFLD	Weighted median	4	-0.100407	0.0222424	6.35433e-06	-0.144002	-0.0568124	Consensus methods
van_der_Harst_CAD	NAFLD	MR Egger	4	-0.290201	0.432261	0.571149	-1.13743	0.55703	Pleiotropy test
van_der_Harst_CAD	NAFLD	Robust adjusted profile score (RAPS)	4	-0.145047	0.111153	0.191915	-0.362907	0.0728124	Pleiotropy test
van_der_Harst_CAD	NAFLD	MR-PRESSO (Outlier-corrected)	4	-0.0871741	0.153052	0.608826	-0.387156	0.212808	Outlier-robust methods
van_der_Harst_CAD	NAFLD	Contamination mixture	4	-0.0792245		0.00913269	-0.259224	-0.0392245	Pleiotropy test
WC_UKB	NAFLD	Inverse variance weighted	4	0.0106488	0.0373017	0.775278	-0.0624626	0.0837603	Primary analysis
WC_UKB	NAFLD	Weighted mode	4	-0.0043543	0.00666225	0.560011	-0.0174123	0.00870372	Consensus methods
WC_UKB	NAFLD	Weighted median	4	-0.00349951	0.00672159	0.60262	-0.0166738	0.0096748	Consensus methods
WC_UKB	NAFLD	MR Egger	4	-0.0206779	0.109638	0.867809	-0.235568	0.194212	Pleiotropy test
WC_UKB	NAFLD	Robust adjusted profile score (RAPS)	4	-0.00202697	0.0193829	0.916713	-0.0400174	0.0359635	Pleiotropy test
WC_UKB	NAFLD	MR-PRESSO (Outlier-corrected)	4	0.0106488	0.0373017	0.793853	-0.0624626	0.0837603	Outlier-robust methods
WC_UKB	NAFLD	Contamination mixture	4	0.00023227		1	-0.00976773	0.00023227	Pleiotropy test
BMI_UKB	Nikpay_CAD	Inverse variance weighted	41	-0.0121384	0.018559	0.513082	-0.048514	0.0242372	Primary analysis
BMI_UKB	Nikpay_CAD	Weighted mode	41	-0.0126246	0.00750243	0.100217	-0.0273294	0.00208014	Consensus methods
BMI_UKB	Nikpay_CAD	Weighted median	41	-0.0151586	0.00720417	0.0353661	-0.0292788	-0.00103842	Consensus methods
BMI_UKB	Nikpay_CAD	MR Egger	41	-0.0576007	0.0425852	0.183974	-0.141068	0.0258663	Pleiotropy test
BMI_UKB	Nikpay_CAD	Robust adjusted profile score (RAPS)	41	-0.0153316	0.00997476	0.124283	-0.0348821	0.00421892	Pleiotropy test
BMI_UKB	Nikpay_CAD	MR-PRESSO (Outlier-corrected)	33	-0.0108614	0.00723124	0.1429	-0.0250346	0.00331186	Outlier-robust methods
BMI_UKB	Nikpay_CAD	Contamination mixture	41	-0.0121511		0.162955	-0.0221511	-0.00215111	Pleiotropy test
GIANT_2015_BMI	Nikpay_CAD	Inverse variance weighted	37	-0.0146291	0.0244235	0.549187	-0.0624992	0.0332409	Primary analysis
GIANT_2015_BMI	Nikpay_CAD	Weighted mode	37	-0.0284091	0.0131054	0.0368693	-0.0540957	-0.0027225	Consensus methods
GIANT_2015_BMI	Nikpay_CAD	Weighted median	37	-0.0171393	0.0124768	0.169538	-0.0415938	0.0073153	Consensus methods
GIANT_2015_BMI	Nikpay_CAD	MR Egger	37	-0.0840776	0.0588446	0.161924	-0.199413	0.0312577	Pleiotropy test
GIANT_2015_BMI	Nikpay_CAD	Robust adjusted profile score (RAPS)	37	-0.0334003	0.0127773	0.00894834	-0.0584438	-0.00835666	Pleiotropy test
GIANT_2015_BMI	Nikpay_CAD	MR-PRESSO (Outlier-corrected)	33	-0.0162843	0.0105664	0.133113	-0.0369944	0.00442578	Outlier-robust methods
GIANT_2015_BMI	Nikpay_CAD	Contamination mixture	37	-0.031446		0.00482152	-0.041446	-0.011446	Pleiotropy test
GIANT_2015_WC	Nikpay_CAD	Inverse variance weighted	37	-0.0184012	0.0207016	0.374068	-0.0589763	0.0221739	Primary analysis
GIANT_2015_WC	Nikpay_CAD	Weighted mode	37	-0.0219212	0.01504	0.153639	-0.0513996	0.00755714	Consensus methods
GIANT_2015_WC	Nikpay_CAD	Weighted median	37	-0.0222062	0.0136448	0.103643	-0.0489501	0.00453769	Consensus methods
GIANT_2015_WC	Nikpay_CAD	MR Egger	37	-0.0723384	0.0504379	0.160388	-0.171197	0.0265199	Pleiotropy test
GIANT_2015_WC	Nikpay_CAD	Robust adjusted profile score (RAPS)	37	-0.0290295	0.0117583	0.0135544	-0.0520757	-0.00598332	Pleiotropy test
GIANT_2015_WC	Nikpay_CAD	MR-PRESSO (Outlier-corrected)	34	-0.0222088	0.00962623	0.0274635	-0.0410762	-0.00334135	Outlier-robust methods
GIANT_2015_WC	Nikpay_CAD	Contamination mixture	37	-0.0191137		0.0688374	-0.0291137	0.00088634	Pleiotropy test
Mahajan_Type2diabetes	Nikpay_CAD	Inverse variance weighted	41	0.0312073	0.0351135	0.374135	-0.0376152	0.10003	Primary analysis
Mahajan_Type2diabetes	Nikpay_CAD	Weighted mode	41	0.0775655	0.0301064	0.0137816	0.0185569	0.136574	Consensus methods
Mahajan_Type2diabetes	Nikpay_CAD	Weighted median	41	0.0596207	0.0262787	0.0232817	0.00811437	0.111127	Consensus methods
Mahajan_Type2diabetes	Nikpay_CAD	MR Egger	41	0.0276249	0.083758	0.743303	-0.136541	0.191791	Pleiotropy test
Mahajan_Type2diabetes	Nikpay_CAD	Robust adjusted profile score (RAPS)	41	0.0354072	0.0280491	0.20683	-0.019569	0.0903833	Pleiotropy test
Mahajan_Type2diabetes	Nikpay_CAD	MR-PRESSO (Outlier-corrected)	34	-0.00245027	0.0231442	0.916327	-0.0478129	0.0429124	Outlier-robust methods
Mahajan_Type2diabetes	Nikpay_CAD	Contamination mixture	41	0.0942613		0.0133122	0.0342613	0.134261	Pleiotropy test
NAFLD	Nikpay_CAD	Inverse variance weighted	41	0.0141175	0.0375844	0.707199	-0.059548	0.087783	Primary analysis
NAFLD	Nikpay_CAD	Weighted mode	41	0.0766625	0.0689394	0.272765	-0.0584586	0.211784	Consensus methods
NAFLD	Nikpay_CAD	Weighted median	41	0.0302526	0.0533148	0.57042	-0.0742445	0.13475	Consensus methods
NAFLD	Nikpay_CAD	MR Egger	41	0.0904373	0.08909	0.316304	-0.084179	0.265054	Pleiotropy test
NAFLD	Nikpay_CAD	Robust adjusted profile score (RAPS)	41	0.0295999	0.0351637	0.399915	-0.039321	0.0985207	Pleiotropy test
NAFLD	Nikpay_CAD	MR-PRESSO (Outlier-corrected)	41	0.0141175	0.0375844	0.709184	-0.059548	0.087783	Outlier-robust methods
NAFLD	Nikpay_CAD	Contamination mixture	41	0.0534777		0.291936	-0.0865223	0.143478	Pleiotropy test
Scott_Type2Diabetes	Nikpay_CAD	Inverse variance weighted	41	0.0559218	0.0513648	0.276278	-0.0447532	0.156597	Primary analysis
Scott_Type2Diabetes	Nikpay_CAD	Weighted mode	41	0.116708	0.073013	0.117812	-0.0263974	0.259813	Consensus methods
Scott_Type2Diabetes	Nikpay_CAD	Weighted median	41	0.0295105	0.0489556	0.54664	-0.0664424	0.125463	Consensus methods
Scott_Type2Diabetes	Nikpay_CAD	MR Egger	41	0.00635821	0.124846	0.959642	-0.23834	0.251056	Pleiotropy test
Scott_Type2Diabetes	Nikpay_CAD	Robust adjusted profile score (RAPS)	41	0.0472442	0.0431563	0.273638	-0.0373422	0.131831	Pleiotropy test
Scott_Type2Diabetes	Nikpay_CAD	MR-PRESSO (Outlier-corrected)	38	0.0494818	0.0372173	0.19181	-0.023464	0.122428	Outlier-robust methods
Scott_Type2Diabetes	Nikpay_CAD	Contamination mixture	41	-0.0485796		0.401661	-0.15858	0.27142	Pleiotropy test
van_der_Harst_CAD	Nikpay_CAD	Inverse variance weighted	41	0.832004	0.0228997	4.96534e-289	0.78712	0.876887	Primary analysis
van_der_Harst_CAD	Nikpay_CAD	Weighted mode	41	0.842704	0.0402253	3.57063e-23	0.763863	0.921546	Consensus methods
van_der_Harst_CAD	Nikpay_CAD	Weighted median	41	0.816287	0.0312851	4.50767e-150	0.754968	0.877606	Consensus methods
van_der_Harst_CAD	Nikpay_CAD	MR Egger	41	0.979984	0.0485139	2.92683e-22	0.884897	1.07507	Pleiotropy test
van_der_Harst_CAD	Nikpay_CAD	Robust adjusted profile score (RAPS)	41	0.829428	0.0210441	0	0.788181	0.870674	Pleiotropy test
van_der_Harst_CAD	Nikpay_CAD	MR-PRESSO (Outlier-corrected)	41	0.832004	0.0228997	2.9817e-32	0.78712	0.876887	Outlier-robust methods
van_der_Harst_CAD	Nikpay_CAD	Contamination mixture	41	0.837404		2.00321e-148	0.787404	0.867404	Pleiotropy test
WC_UKB	Nikpay_CAD	Inverse variance weighted	41	-0.00523487	0.0155527	0.736427	-0.0357182	0.0252485	Primary analysis
WC_UKB	Nikpay_CAD	Weighted mode	41	-0.00447855	0.00675581	0.511185	-0.0177199	0.00876283	Consensus methods
WC_UKB	Nikpay_CAD	Weighted median	41	-0.00848509	0.00729712	0.244911	-0.0227874	0.00581726	Consensus methods
WC_UKB	Nikpay_CAD	MR Egger	41	-0.0355412	0.0359219	0.328566	-0.105948	0.0348657	Pleiotropy test
WC_UKB	Nikpay_CAD	Robust adjusted profile score (RAPS)	41	-0.00720815	0.0085561	0.399532	-0.0239781	0.0095618	Pleiotropy test
WC_UKB	Nikpay_CAD	MR-PRESSO (Outlier-corrected)	34	-0.00628213	0.00602445	0.304633	-0.01809	0.0055258	Outlier-robust methods
WC_UKB	Nikpay_CAD	Contamination mixture	41	-0.00718734		0.373624	-0.0171873	0.00281266	Pleiotropy test
BMI_UKB	Scott_Type2Diabetes	Inverse variance weighted	40	-0.000416395	0.0226204	0.985313	-0.0447524	0.0439196	Primary analysis
BMI_UKB	Scott_Type2Diabetes	Weighted mode	40	-0.0475224	0.00596532	1.04945e-09	-0.0592144	-0.0358303	Consensus methods
BMI_UKB	Scott_Type2Diabetes	Weighted median	40	-0.0472056	0.00599775	3.53072e-15	-0.0589612	-0.03545	Consensus methods
BMI_UKB	Scott_Type2Diabetes	MR Egger	40	-0.0122488	0.0614458	0.843058	-0.132683	0.108185	Pleiotropy test
BMI_UKB	Scott_Type2Diabetes	Robust adjusted profile score (RAPS)	40	-0.0411122	0.00661129	5.01968e-10	-0.0540704	-0.0281541	Pleiotropy test
BMI_UKB	Scott_Type2Diabetes	MR-PRESSO (Outlier-corrected)	27	-0.0185847	0.00783106	0.0253107	-0.0339336	-0.00323584	Outlier-robust methods
BMI_UKB	Scott_Type2Diabetes	Contamination mixture	40	-0.0440424		2.42617e-09	-0.0540424	-0.0440424	Pleiotropy test
GIANT_2015_BMI	Scott_Type2Diabetes	Inverse variance weighted	37	-0.0279103	0.0294063	0.342555	-0.0855466	0.0297259	Primary analysis
GIANT_2015_BMI	Scott_Type2Diabetes	Weighted mode	37	-0.0792724	0.00945399	5.49572e-10	-0.0978022	-0.0607426	Consensus methods
GIANT_2015_BMI	Scott_Type2Diabetes	Weighted median	37	-0.0783703	0.0100129	5.00017e-15	-0.0979956	-0.0587449	Consensus methods
GIANT_2015_BMI	Scott_Type2Diabetes	MR Egger	37	-0.0290322	0.0760321	0.704888	-0.178055	0.119991	Pleiotropy test
GIANT_2015_BMI	Scott_Type2Diabetes	Robust adjusted profile score (RAPS)	37	-0.0740324	0.00977861	3.70786e-14	-0.0931985	-0.0548663	Pleiotropy test
GIANT_2015_BMI	Scott_Type2Diabetes	MR-PRESSO (Outlier-corrected)	28	-0.0550025	0.010285	1.19778e-05	-0.0751611	-0.0348438	Outlier-robust methods
GIANT_2015_BMI	Scott_Type2Diabetes	Contamination mixture	37	-0.0818421		3.17769e-10	-0.0918421	-0.0718421	Pleiotropy test
GIANT_2015_WC	Scott_Type2Diabetes	Inverse variance weighted	37	-0.0145198	0.0268833	0.589125	-0.067211	0.0381714	Primary analysis
GIANT_2015_WC	Scott_Type2Diabetes	Weighted mode	37	-0.0633032	0.0117035	4.28618e-06	-0.086242	-0.0403644	Consensus methods
GIANT_2015_WC	Scott_Type2Diabetes	Weighted median	37	-0.0504473	0.0109789	4.32867e-06	-0.0719659	-0.0289287	Consensus methods
GIANT_2015_WC	Scott_Type2Diabetes	MR Egger	37	-0.0259897	0.0689956	0.708681	-0.161221	0.109242	Pleiotropy test
GIANT_2015_WC	Scott_Type2Diabetes	Robust adjusted profile score (RAPS)	37	-0.0510617	0.0140033	0.000265948	-0.0785082	-0.0236151	Pleiotropy test
GIANT_2015_WC	Scott_Type2Diabetes	MR-PRESSO (Outlier-corrected)	30	-0.0325836	0.0115976	0.00879263	-0.0553148	-0.00985236	Outlier-robust methods
GIANT_2015_WC	Scott_Type2Diabetes	Contamination mixture	37	-0.0594737		0.00624759	-0.0694737	-0.00947368	Pleiotropy test
Mahajan_Type2diabetes	Scott_Type2Diabetes	Inverse variance weighted	40	0.885709	0.0261575	2.53398e-251	0.83444	0.936977	Primary analysis
Mahajan_Type2diabetes	Scott_Type2Diabetes	Weighted mode	40	0.787661	0.0748216	5.85472e-13	0.641011	0.934311	Consensus methods
Mahajan_Type2diabetes	Scott_Type2Diabetes	Weighted median	40	0.821233	0.0342272	3.24661e-127	0.754147	0.888318	Consensus methods
Mahajan_Type2diabetes	Scott_Type2Diabetes	MR Egger	40	1.06847	0.0627597	2.25268e-19	0.945466	1.19148	Pleiotropy test
Mahajan_Type2diabetes	Scott_Type2Diabetes	Robust adjusted profile score (RAPS)	40	0.854017	0.0218953	0	0.811102	0.896932	Pleiotropy test
Mahajan_Type2diabetes	Scott_Type2Diabetes	MR-PRESSO (Outlier-corrected)	39	0.840296	0.0245553	3.67469e-30	0.792168	0.888424	Outlier-robust methods
Mahajan_Type2diabetes	Scott_Type2Diabetes	Contamination mixture	40	0.84		2.61179e-226	0.8	0.89	Pleiotropy test
NAFLD	Scott_Type2Diabetes	Inverse variance weighted	40	0.08942	0.042966	0.0374172	0.00520673	0.173633	Primary analysis
NAFLD	Scott_Type2Diabetes	Weighted mode	40	-0.0870032	0.0606657	0.159502	-0.205908	0.0319016	Consensus methods
NAFLD	Scott_Type2Diabetes	Weighted median	40	0.0660179	0.0448488	0.141018	-0.0218858	0.153922	Consensus methods
NAFLD	Scott_Type2Diabetes	MR Egger	40	0.0256977	0.11828	0.829167	-0.206131	0.257526	Pleiotropy test
NAFLD	Scott_Type2Diabetes	Robust adjusted profile score (RAPS)	40	0.0769287	0.0352512	0.0290873	0.00783637	0.146021	Pleiotropy test
NAFLD	Scott_Type2Diabetes	MR-PRESSO (Outlier-corrected)	36	0.10103	0.0332172	0.00444077	0.0359242	0.166136	Outlier-robust methods
NAFLD	Scott_Type2Diabetes	Contamination mixture	40	0.0561638		0.446179	-0.0638362	0.216164	Pleiotropy test
Nikpay_CAD	Scott_Type2Diabetes	Inverse variance weighted	40	0.102443	0.0340867	0.0026525	0.0356335	0.169253	Primary analysis
Nikpay_CAD	Scott_Type2Diabetes	Weighted mode	40	0.101916	0.0264935	0.00043168	0.0499884	0.153843	Consensus methods
Nikpay_CAD	Scott_Type2Diabetes	Weighted median	40	0.107602	0.0272027	7.63584e-05	0.0542845	0.160919	Consensus methods
Nikpay_CAD	Scott_Type2Diabetes	MR Egger	40	0.106107	0.0916726	0.254309	-0.0735711	0.285785	Pleiotropy test
Nikpay_CAD	Scott_Type2Diabetes	Robust adjusted profile score (RAPS)	40	0.11215	0.0291203	0.000117504	0.0550746	0.169226	Pleiotropy test
Nikpay_CAD	Scott_Type2Diabetes	MR-PRESSO (Outlier-corrected)	34	0.111555	0.020057	3.51121e-06	0.0722435	0.150867	Outlier-robust methods
Nikpay_CAD	Scott_Type2Diabetes	Contamination mixture	40	0.107552		0.000191787	0.0575516	0.147552	Pleiotropy test
van_der_Harst_CAD	Scott_Type2Diabetes	Inverse variance weighted	40	0.098049	0.0365044	0.00723245	0.0265003	0.169598	Primary analysis
van_der_Harst_CAD	Scott_Type2Diabetes	Weighted mode	40	0.0835994	0.0159006	5.53905e-06	0.0524342	0.114765	Consensus methods
van_der_Harst_CAD	Scott_Type2Diabetes	Weighted median	40	0.0876882	0.0173808	4.53238e-07	0.0536219	0.121755	Consensus methods
van_der_Harst_CAD	Scott_Type2Diabetes	MR Egger	40	0.0559869	0.0957385	0.562145	-0.13166	0.243634	Pleiotropy test
van_der_Harst_CAD	Scott_Type2Diabetes	Robust adjusted profile score (RAPS)	40	0.0971623	0.0251489	0.000111783	0.0478704	0.146454	Pleiotropy test
van_der_Harst_CAD	Scott_Type2Diabetes	MR-PRESSO (Outlier-corrected)	32	0.0971946	0.0155786	6.22782e-07	0.0666605	0.127729	Outlier-robust methods
van_der_Harst_CAD	Scott_Type2Diabetes	Contamination mixture	40	0.0875		0.000168123	0.0475	0.1275	Pleiotropy test
WC_UKB	Scott_Type2Diabetes	Inverse variance weighted	40	0.0174399	0.0178233	0.327832	-0.0174937	0.0523735	Primary analysis
WC_UKB	Scott_Type2Diabetes	Weighted mode	40	-0.0243031	0.00565978	0.000112592	-0.0353963	-0.01321	Consensus methods
WC_UKB	Scott_Type2Diabetes	Weighted median	40	-0.0200259	0.00546626	0.000248758	-0.0307397	-0.00931197	Consensus methods
WC_UKB	Scott_Type2Diabetes	MR Egger	40	-0.00325053	0.0483053	0.946703	-0.0979289	0.0914279	Pleiotropy test
WC_UKB	Scott_Type2Diabetes	Robust adjusted profile score (RAPS)	40	-0.015802	0.00590361	0.00743576	-0.0273731	-0.00423095	Pleiotropy test
WC_UKB	Scott_Type2Diabetes	MR-PRESSO (Outlier-corrected)	25	0.00477141	0.00606566	0.439199	-0.00711727	0.0166601	Outlier-robust methods
WC_UKB	Scott_Type2Diabetes	Contamination mixture	40	-0.0293491		0.000927279	-0.0293491	-0.0193491	Pleiotropy test
BMI_UKB	van_der_Harst_CAD	Inverse variance weighted	144	0.00516336	0.0122234	0.672723	-0.0187946	0.0291213	Primary analysis
BMI_UKB	van_der_Harst_CAD	Weighted mode	144	-0.014168	0.0071268	0.0487217	-0.0281366	-0.000199505	Consensus methods
BMI_UKB	van_der_Harst_CAD	Weighted median	144	-0.00792609	0.00665198	0.233442	-0.020964	0.00511178	Consensus methods
BMI_UKB	van_der_Harst_CAD	MR Egger	144	-0.0483038	0.0244608	0.0502371	-0.096247	-0.000360592	Pleiotropy test
BMI_UKB	van_der_Harst_CAD	Robust adjusted profile score (RAPS)	144	-0.00604595	0.00724835	0.404217	-0.0202527	0.00816083	Pleiotropy test
BMI_UKB	van_der_Harst_CAD	MR-PRESSO (Outlier-corrected)	116	-0.00703663	0.00574921	0.223481	-0.0183051	0.00423183	Outlier-robust methods
BMI_UKB	van_der_Harst_CAD	Contamination mixture	144	-0.0110876		0.0164508	-0.0210876	-0.00108756	Pleiotropy test
GIANT_2015_BMI	van_der_Harst_CAD	Inverse variance weighted	134	-0.0167324	0.0141528	0.237098	-0.0444718	0.011007	Primary analysis
GIANT_2015_BMI	van_der_Harst_CAD	Weighted mode	134	-0.0347515	0.0138072	0.0130266	-0.0618136	-0.00768942	Consensus methods
GIANT_2015_BMI	van_der_Harst_CAD	Weighted median	134	-0.0366726	0.0113179	0.00119429	-0.0588557	-0.0144896	Consensus methods
GIANT_2015_BMI	van_der_Harst_CAD	MR Egger	134	-0.0700465	0.0323475	0.0321519	-0.133448	-0.00664534	Pleiotropy test
GIANT_2015_BMI	van_der_Harst_CAD	Robust adjusted profile score (RAPS)	134	-0.0340375	0.0092239	0.000224123	-0.0521164	-0.0159587	Pleiotropy test
GIANT_2015_BMI	van_der_Harst_CAD	MR-PRESSO (Outlier-corrected)	125	-0.0290818	0.00855087	0.000903916	-0.0458415	-0.0123221	Outlier-robust methods
GIANT_2015_BMI	van_der_Harst_CAD	Contamination mixture	134	-0.0469565		6.09806e-05	-0.0669565	-0.0269565	Pleiotropy test
GIANT_2015_WC	van_der_Harst_CAD	Inverse variance weighted	134	-0.0181095	0.0126907	0.153584	-0.0429833	0.00676432	Primary analysis
GIANT_2015_WC	van_der_Harst_CAD	Weighted mode	134	-0.0311639	0.0137694	0.025239	-0.0581519	-0.00417586	Consensus methods
GIANT_2015_WC	van_der_Harst_CAD	Weighted median	134	-0.0286421	0.0132492	0.0306339	-0.0546105	-0.00267364	Consensus methods
GIANT_2015_WC	van_der_Harst_CAD	MR Egger	134	-0.0691289	0.0290419	0.0187278	-0.126051	-0.0122067	Pleiotropy test
GIANT_2015_WC	van_der_Harst_CAD	Robust adjusted profile score (RAPS)	134	-0.0326835	0.00854185	0.000130096	-0.0494255	-0.0159415	Pleiotropy test
GIANT_2015_WC	van_der_Harst_CAD	MR-PRESSO (Outlier-corrected)	129	-0.0345292	0.00822587	5.00906e-05	-0.0506519	-0.0184065	Outlier-robust methods
GIANT_2015_WC	van_der_Harst_CAD	Contamination mixture	134	-0.0377494		0.000588987	-0.0577494	-0.0177494	Pleiotropy test
Mahajan_Type2diabetes	van_der_Harst_CAD	Inverse variance weighted	144	0.104631	0.02895	0.000301272	0.0478891	0.161373	Primary analysis
Mahajan_Type2diabetes	van_der_Harst_CAD	Weighted mode	144	0.0651053	0.0277792	0.0204724	0.010658	0.119553	Consensus methods
Mahajan_Type2diabetes	van_der_Harst_CAD	Weighted median	144	0.0579454	0.0249877	0.0203976	0.00896943	0.106921	Consensus methods
Mahajan_Type2diabetes	van_der_Harst_CAD	MR Egger	144	-0.0356988	0.058981	0.545973	-0.151302	0.079904	Pleiotropy test
Mahajan_Type2diabetes	van_der_Harst_CAD	Robust adjusted profile score (RAPS)	144	0.0654982	0.0254981	0.0102066	0.015522	0.115474	Pleiotropy test
Mahajan_Type2diabetes	van_der_Harst_CAD	MR-PRESSO (Outlier-corrected)	120	0.0770662	0.0197603	0.000159672	0.0383361	0.115796	Outlier-robust methods
Mahajan_Type2diabetes	van_der_Harst_CAD	Contamination mixture	144	0.0506007		0.00588986	0.0206007	0.120601	Pleiotropy test
NAFLD	van_der_Harst_CAD	Inverse variance weighted	143	0.072887	0.0311232	0.0191865	0.0118856	0.133888	Primary analysis
NAFLD	van_der_Harst_CAD	Weighted mode	143	0.036073	0.0600433	0.548943	-0.081612	0.153758	Consensus methods
NAFLD	van_der_Harst_CAD	Weighted median	143	0.0457369	0.0477136	0.337775	-0.0477817	0.139256	Consensus methods
NAFLD	van_der_Harst_CAD	MR Egger	143	-0.0091595	0.0638878	0.886204	-0.13438	0.116061	Pleiotropy test
NAFLD	van_der_Harst_CAD	Robust adjusted profile score (RAPS)	143	0.0618041	0.0301014	0.0400538	0.00280526	0.120803	Pleiotropy test
NAFLD	van_der_Harst_CAD	MR-PRESSO (Outlier-corrected)	143	0.072887	0.0311232	0.0205763	0.0118856	0.133888	Outlier-robust methods
NAFLD	van_der_Harst_CAD	Contamination mixture	143	0.0803609		0.0398669	0.0103609	0.170361	Pleiotropy test
Nikpay_CAD	van_der_Harst_CAD	Inverse variance weighted	144	1.05311	0.0180704	0	1.01769	1.08853	Primary analysis
Nikpay_CAD	van_der_Harst_CAD	Weighted mode	144	1.00317	0.0671882	5.66108e-31	0.871485	1.13486	Consensus methods
Nikpay_CAD	van_der_Harst_CAD	Weighted median	144	1.03264	0.0321384	1.62957e-226	0.969648	1.09563	Consensus methods
Nikpay_CAD	van_der_Harst_CAD	MR Egger	144	1.09757	0.0427553	3.3213e-55	1.01377	1.18137	Pleiotropy test
Nikpay_CAD	van_der_Harst_CAD	Robust adjusted profile score (RAPS)	144	1.06286	0.02196	0	1.01982	1.1059	Pleiotropy test
Nikpay_CAD	van_der_Harst_CAD	MR-PRESSO (Outlier-corrected)	144	1.05311	0.0156769	4.74959e-110	1.02238	1.08384	Outlier-robust methods
Nikpay_CAD	van_der_Harst_CAD	Contamination mixture	144	1.0583		2.60289e-228	1.0283	1.0983	Pleiotropy test
Scott_Type2Diabetes	van_der_Harst_CAD	Inverse variance weighted	144	0.112638	0.0386769	0.00358798	0.0368313	0.188445	Primary analysis
Scott_Type2Diabetes	van_der_Harst_CAD	Weighted mode	144	0.0255287	0.0654095	0.696902	-0.102674	0.153731	Consensus methods
Scott_Type2Diabetes	van_der_Harst_CAD	Weighted median	144	0.0380014	0.0442398	0.390347	-0.0487086	0.124711	Consensus methods
Scott_Type2Diabetes	van_der_Harst_CAD	MR Egger	144	-0.0486153	0.0808767	0.548729	-0.207134	0.109903	Pleiotropy test
Scott_Type2Diabetes	van_der_Harst_CAD	Robust adjusted profile score (RAPS)	144	0.068875	0.0391027	0.0781731	-0.00776636	0.145516	Pleiotropy test
Scott_Type2Diabetes	van_der_Harst_CAD	MR-PRESSO (Outlier-corrected)	139	0.0954121	0.0342974	0.00616078	0.0281892	0.162635	Outlier-robust methods
Scott_Type2Diabetes	van_der_Harst_CAD	Contamination mixture	144	0.18087		0.12863	-0.0691304	0.29087	Pleiotropy test
WC_UKB	van_der_Harst_CAD	Inverse variance weighted	144	0.0102731	0.00985502	0.297214	-0.0090427	0.029589	Primary analysis
WC_UKB	van_der_Harst_CAD	Weighted mode	144	-0.0011032	0.00679576	0.87127	-0.0144229	0.0122165	Consensus methods
WC_UKB	van_der_Harst_CAD	Weighted median	144	-0.00544602	0.006433	0.397232	-0.0180547	0.00716265	Consensus methods
WC_UKB	van_der_Harst_CAD	MR Egger	144	-0.0380024	0.0196101	0.0546198	-0.0764382	0.000433382	Pleiotropy test
WC_UKB	van_der_Harst_CAD	Robust adjusted profile score (RAPS)	144	0.000465109	0.00698275	0.946894	-0.0132211	0.0141513	Pleiotropy test
WC_UKB	van_der_Harst_CAD	MR-PRESSO (Outlier-corrected)	122	-0.00105512	0.00523059	0.840473	-0.0113071	0.00919682	Outlier-robust methods
WC_UKB	van_der_Harst_CAD	Contamination mixture	144	0.000146082		1	-0.00985392	0.000146082	Pleiotropy test
Mahajan_Type2diabetes	WC_UKB	Inverse variance weighted	374	1.29593	0.0591318	1.83162e-106	1.18003	1.41183	Primary analysis
Mahajan_Type2diabetes	WC_UKB	Weighted mode	374	1.34142	0.113834	1.83042e-27	1.11831	1.56453	Consensus methods
Mahajan_Type2diabetes	WC_UKB	Weighted median	374	1.31867	0.047735	5.61939e-168	1.22511	1.41223	Consensus methods
Mahajan_Type2diabetes	WC_UKB	MR Egger	374	1.27212	0.171879	9.07688e-13	0.935234	1.609	Pleiotropy test
Mahajan_Type2diabetes	WC_UKB	Robust adjusted profile score (RAPS)	374	1.38121	0.0399369	4.26418e-262	1.30294	1.45949	Pleiotropy test
Mahajan_Type2diabetes	WC_UKB	MR-PRESSO (Outlier-corrected)	348	1.35126	0.0379697	7.63687e-118	1.27684	1.42569	Outlier-robust methods
Mahajan_Type2diabetes	WC_UKB	Contamination mixture	374	1.6312		4.72882e-107	1.4812	1.7012	Pleiotropy test
NAFLD	WC_UKB	Inverse variance weighted	371	0.682301	0.069242	6.59585e-23	0.546587	0.818015	Primary analysis
NAFLD	WC_UKB	Weighted mode	371	0.971257	0.318903	0.00248844	0.346207	1.59631	Consensus methods
NAFLD	WC_UKB	Weighted median	371	0.679372	0.102129	2.88913e-11	0.4792	0.879545	Consensus methods
NAFLD	WC_UKB	MR Egger	371	0.590815	0.200711	0.00344944	0.19742	0.984209	Pleiotropy test
NAFLD	WC_UKB	Robust adjusted profile score (RAPS)	371	0.672967	0.0702332	9.52838e-22	0.53531	0.810624	Pleiotropy test
NAFLD	WC_UKB	MR-PRESSO (Outlier-corrected)	369	0.671973	0.066857	3.66968e-21	0.540933	0.803012	Outlier-robust methods
NAFLD	WC_UKB	Contamination mixture	371	1.10719		4.82594e-14	0.897187	1.33719	Pleiotropy test
Nikpay_CAD	WC_UKB	Inverse variance weighted	372	0.484494	0.0455055	1.80232e-26	0.395303	0.573684	Primary analysis
Nikpay_CAD	WC_UKB	Weighted mode	372	0.504189	0.140894	0.000391434	0.228036	0.780342	Consensus methods
Nikpay_CAD	WC_UKB	Weighted median	372	0.480481	0.0704873	9.32453e-12	0.342326	0.618636	Consensus methods
Nikpay_CAD	WC_UKB	MR Egger	372	0.605876	0.133044	7.15613e-06	0.34511	0.866642	Pleiotropy test
Nikpay_CAD	WC_UKB	Robust adjusted profile score (RAPS)	372	0.523971	0.0434797	1.91758e-33	0.43875	0.609191	Pleiotropy test
Nikpay_CAD	WC_UKB	MR-PRESSO (Outlier-corrected)	367	0.490252	0.0419205	4.6361e-27	0.408088	0.572416	Outlier-robust methods
Nikpay_CAD	WC_UKB	Contamination mixture	372	0.652916		3.41621e-20	0.502916	0.882916	Pleiotropy test
Scott_Type2Diabetes	WC_UKB	Inverse variance weighted	374	1.17701	0.0720997	6.58046e-60	1.03569	1.31833	Primary analysis
Scott_Type2Diabetes	WC_UKB	Weighted mode	374	1.40985	0.254433	5.68795e-08	0.911167	1.90854	Consensus methods
Scott_Type2Diabetes	WC_UKB	Weighted median	374	1.25062	0.0791803	3.38766e-56	1.09543	1.40582	Consensus methods
Scott_Type2Diabetes	WC_UKB	MR Egger	374	1.20778	0.209154	1.62927e-08	0.797842	1.61773	Pleiotropy test
Scott_Type2Diabetes	WC_UKB	Robust adjusted profile score (RAPS)	374	1.18917	0.0624752	8.86572e-81	1.06672	1.31162	Pleiotropy test
Scott_Type2Diabetes	WC_UKB	MR-PRESSO (Outlier-corrected)	358	1.14613	0.0592851	1.73287e-57	1.02993	1.26233	Outlier-robust methods
Scott_Type2Diabetes	WC_UKB	Contamination mixture	374	1.44061		5.22783e-50	1.30061	1.59061	Pleiotropy test
van_der_Harst_CAD	WC_UKB	Inverse variance weighted	373	0.478271	0.0360863	4.30446e-40	0.407542	0.549	Primary analysis
van_der_Harst_CAD	WC_UKB	Weighted mode	373	0.480623	0.0664539	2.72463e-12	0.350373	0.610872	Consensus methods
van_der_Harst_CAD	WC_UKB	Weighted median	373	0.464252	0.0427406	1.74708e-27	0.380481	0.548024	Consensus methods
van_der_Harst_CAD	WC_UKB	MR Egger	373	0.424156	0.102537	4.36372e-05	0.223183	0.625128	Pleiotropy test
van_der_Harst_CAD	WC_UKB	Robust adjusted profile score (RAPS)	373	0.514701	0.0336277	6.98615e-53	0.448791	0.580611	Pleiotropy test
van_der_Harst_CAD	WC_UKB	MR-PRESSO (Outlier-corrected)	359	0.498582	0.0298262	8.98312e-47	0.440123	0.557041	Outlier-robust methods
van_der_Harst_CAD	WC_UKB	Contamination mixture	373	0.688109		1.31325e-39	0.628109	0.778109	Pleiotropy test

## Sheet: sup tab4. Genetic Instruments
exposure	chr.exposure	pos.exposure	other_allele.exposure	effect_allele.exposure	beta.exposure	se.exposure	pval.exposure	eaf.exposure	samplesize.exposure	ncase.exposure	SNP	ncontrol.exposure	mr_keep.exposure	pval_origin.exposure	id.exposure
Mahajan_Type2diabetes	1	40035928	G	T	0.085	0.008	1.29987e-26	0.2	898130	74124	rs3768321	824006	TRUE	reported	7h4M83
Mahajan_Type2diabetes	1	51256091	C	T	-0.065	0.01	1.79999e-10	0.12	898130	74124	rs58432198	824006	TRUE	reported	7h4M83
Mahajan_Type2diabetes	1	62579891	G	T	-0.064	0.011	1.2e-08	0.095	898130	74124	rs12140153	824006	TRUE	reported	7h4M83
Mahajan_Type2diabetes	1	117532790	C	T	-0.047	0.0064	2.29985e-13	0.42	898130	74124	rs1127215	824006	TRUE	reported	7h4M83
Mahajan_Type2diabetes	1	120526982	C	T	0.084	0.01	2.09991e-16	0.11	898130	74124	rs1493694	824006	TRUE	reported	7h4M83
Mahajan_Type2diabetes	1	151017991	T	C	-0.17	0.031	2.19999e-08	0.01	898130	74124	rs145904381	824006	TRUE	reported	7h4M83
Mahajan_Type2diabetes	1	177889025	A	C	0.051	0.008	1.2e-10	0.2	898130	74124	rs539515	824006	TRUE	reported	7h4M83
Mahajan_Type2diabetes	1	205125662	T	C	0.042	0.0073	1.29999e-08	0.24	898130	74124	rs7538328	824006	TRUE	reported	7h4M83
Mahajan_Type2diabetes	1	214159256	T	C	0.068	0.0064	5.60015e-26	0.56	898130	74124	rs340874	824006	TRUE	reported	7h4M83
Mahajan_Type2diabetes	1	219762581	C	A	-0.055	0.007	6.59933e-15	0.29	898130	74124	rs2494196	824006	TRUE	reported	7h4M83
Mahajan_Type2diabetes	1	229672955	G	A	-0.051	0.0067	3.90032e-14	0.64	898130	74124	rs348330	824006	TRUE	reported	7h4M83
Mahajan_Type2diabetes	1	235691913	T	C	-0.039	0.0067	6.69993e-09	0.33	898130	74124	rs291369	824006	TRUE	reported	7h4M83
Mahajan_Type2diabetes	2	422144	T	C	-0.11	0.016	1.80011e-11	0.05	898130	74124	rs62107261	824006	TRUE	reported	7h4M83
Mahajan_Type2diabetes	2	652247	G	A	-0.054	0.0085	1.79999e-10	0.17	898130	74124	rs7608050	824006	TRUE	reported	7h4M83
Mahajan_Type2diabetes	2	16574669	G	A	0.058	0.01	1.29999e-08	0.86	898130	74124	rs11680058	824006	TRUE	reported	7h4M83
Mahajan_Type2diabetes	2	27730940	T	C	0.067	0.0065	1.29987e-24	0.61	898130	74124	rs1260326	824006	TRUE	reported	7h4M83
Mahajan_Type2diabetes	2	43698028	A	T	-0.13	0.011	2.70023e-30	0.1	898130	74124	rs80147536	824006	TRUE	reported	7h4M83
Mahajan_Type2diabetes	2	58981064	G	T	0.037	0.0065	1.7e-08	0.61	898130	74124	rs10193538	824006	TRUE	reported	7h4M83
Mahajan_Type2diabetes	2	60583665	G	A	0.058	0.0063	4.40048e-20	0.46	898130	74124	rs243024	824006	TRUE	reported	7h4M83
Mahajan_Type2diabetes	2	65659488	A	G	-0.051	0.0065	7.19946e-15	0.4	898130	74124	rs12185577	824006	TRUE	reported	7h4M83
Mahajan_Type2diabetes	2	121347612	G	C	-0.058	0.0075	1.39991e-14	0.27	898130	74124	rs11688682	824006	TRUE	reported	7h4M83
Mahajan_Type2diabetes	2	147861633	C	T	0.052	0.0091	8.30004e-09	0.15	898130	74124	rs35999103	824006	TRUE	reported	7h4M83
Mahajan_Type2diabetes	2	158339550	A	G	-0.082	0.013	6.4e-10	0.06	898130	74124	rs13426680	824006	TRUE	reported	7h4M83
Mahajan_Type2diabetes	2	161131694	G	A	0.048	0.0072	3.80014e-11	0.73	898130	74124	rs1563575	824006	TRUE	reported	7h4M83
Mahajan_Type2diabetes	2	165513091	T	C	-0.06	0.0064	1.59993e-20	0.41	898130	74124	rs10195252	824006	TRUE	reported	7h4M83
Mahajan_Type2diabetes	2	227101411	A	G	0.094	0.0066	7.89951e-46	0.64	898130	74124	rs2972144	824006	TRUE	reported	7h4M83
Mahajan_Type2diabetes	3	12336507	G	A	-0.11	0.0098	1.59993e-27	0.12	898130	74124	rs11709077	824006	TRUE	reported	7h4M83
Mahajan_Type2diabetes	3	23455582	T	C	-0.071	0.0079	9.49948e-20	0.21	898130	74124	rs35352848	824006	TRUE	reported	7h4M83
Mahajan_Type2diabetes	3	49980596	C	T	0.043	0.0069	4.49997e-10	0.68	898130	74124	rs4688760	824006	TRUE	reported	7h4M83
Mahajan_Type2diabetes	3	63897215	C	T	-0.065	0.0089	3.29989e-13	0.16	898130	74124	rs2292662	824006	TRUE	reported	7h4M83
Mahajan_Type2diabetes	3	64701146	A	G	-0.055	0.007	7.39946e-15	0.3	898130	74124	rs9860730	824006	TRUE	reported	7h4M83
Mahajan_Type2diabetes	3	77671721	C	A	-0.037	0.0065	1.2e-08	0.38	898130	74124	rs2272163	824006	TRUE	reported	7h4M83
Mahajan_Type2diabetes	3	123065778	A	G	-0.089	0.0076	1.29987e-31	0.23	898130	74124	rs11708067	824006	TRUE	reported	7h4M83
Mahajan_Type2diabetes	3	124919777	T	C	0.039	0.0064	1.40001e-09	0.54	898130	74124	rs4679370	824006	TRUE	reported	7h4M83
Mahajan_Type2diabetes	3	150066540	T	A	0.088	0.014	1e-09	0.055	898130	74124	rs62271373	824006	TRUE	reported	7h4M83
Mahajan_Type2diabetes	3	152095708	T	C	-0.038	0.0066	1.5e-08	0.36	898130	74124	rs12630224	824006	TRUE	reported	7h4M83
Mahajan_Type2diabetes	3	168218841	A	T	-0.051	0.0091	2.19999e-08	0.14	898130	74124	rs7629630	824006	TRUE	reported	7h4M83
Mahajan_Type2diabetes	3	170733076	G	A	-0.066	0.007	8.49963e-21	0.29	898130	74124	rs9873618	824006	TRUE	reported	7h4M83
Mahajan_Type2diabetes	3	185503456	T	A	0.11	0.0068	2.49977e-58	0.31	898130	74124	rs6780171	824006	TRUE	reported	7h4M83
Mahajan_Type2diabetes	3	186647652	C	T	0.041	0.007	5.89997e-09	0.28	898130	74124	rs9814673	824006	TRUE	reported	7h4M83
Mahajan_Type2diabetes	3	187740899	T	C	0.06	0.0065	3.10027e-20	0.61	898130	74124	rs4686471	824006	TRUE	reported	7h4M83
Mahajan_Type2diabetes	4	744972	G	T	0.11	0.015	1.20005e-12	0.046	898130	74124	rs1531583	824006	TRUE	reported	7h4M83
Mahajan_Type2diabetes	4	1788130	C	G	0.046	0.0075	1e-09	0.3	898130	74124	rs4865436	824006	TRUE	reported	7h4M83
Mahajan_Type2diabetes	4	6306763	G	C	0.087	0.0065	1.59993e-40	0.59	898130	74124	rs10937721	824006	TRUE	reported	7h4M83
Mahajan_Type2diabetes	4	17792869	A	C	0.039	0.0071	4.49997e-08	0.71	898130	74124	rs12640250	824006	TRUE	reported	7h4M83
Mahajan_Type2diabetes	4	45186139	G	A	0.044	0.0064	4.90004e-12	0.43	898130	74124	rs10938398	824006	TRUE	reported	7h4M83
Mahajan_Type2diabetes	4	52818664	A	G	0.038	0.0069	4.49997e-08	0.32	898130	74124	rs2102278	824006	TRUE	reported	7h4M83
Mahajan_Type2diabetes	4	83587562	G	C	-0.042	0.0067	5.69994e-10	0.66	898130	74124	rs10471048	824006	TRUE	reported	7h4M83
Mahajan_Type2diabetes	4	95091911	A	G	-0.042	0.0063	5.40008e-11	0.47	898130	74124	rs6821438	824006	TRUE	reported	7h4M83
Mahajan_Type2diabetes	4	104140848	C	A	-0.041	0.0064	2.90001e-10	0.53	898130	74124	rs1580278	824006	TRUE	reported	7h4M83
Mahajan_Type2diabetes	4	137083193	A	C	-0.035	0.0064	4.30002e-08	0.55	898130	74124	rs1296328	824006	TRUE	reported	7h4M83
Mahajan_Type2diabetes	4	153513369	T	A	-0.054	0.007	1.80011e-14	0.3	898130	74124	rs7669833	824006	TRUE	reported	7h4M83
Mahajan_Type2diabetes	4	185717759	T	C	-0.068	0.0092	1e-13	0.14	898130	74124	rs58730668	824006	TRUE	reported	7h4M83
Mahajan_Type2diabetes	5	14768092	C	G	-0.078	0.011	9.49948e-13	0.1	898130	74124	rs6885132	824006	TRUE	reported	7h4M83
Mahajan_Type2diabetes	5	44945090	G	C	0.038	0.0065	5.80003e-09	0.4	898130	74124	rs11958808	824006	TRUE	reported	7h4M83
Mahajan_Type2diabetes	5	52072194	G	A	0.046	0.0076	2.1e-09	0.22	898130	74124	rs2648731	824006	TRUE	reported	7h4M83
Mahajan_Type2diabetes	5	53271420	G	A	0.051	0.0069	2.09991e-13	0.69	898130	74124	rs702634	824006	TRUE	reported	7h4M83
Mahajan_Type2diabetes	5	55808475	C	T	0.073	0.0073	3.80014e-23	0.74	898130	74124	rs465002	824006	TRUE	reported	7h4M83
Mahajan_Type2diabetes	5	75003678	T	C	-0.053	0.0065	3.29989e-16	0.39	898130	74124	rs2307111	824006	TRUE	reported	7h4M83
Mahajan_Type2diabetes	5	76424949	G	A	-0.059	0.0069	1.39991e-17	0.7	898130	74124	rs4457053	824006	TRUE	reported	7h4M83
Mahajan_Type2diabetes	5	78417775	T	C	-0.043	0.0066	9.60064e-11	0.37	898130	74124	rs72764958	824006	TRUE	reported	7h4M83
Mahajan_Type2diabetes	5	102422968	C	T	0.17	0.015	1.69981e-29	0.05	898130	74124	rs115505614	824006	TRUE	reported	7h4M83
Mahajan_Type2diabetes	5	133864599	G	A	0.037	0.0064	9.20005e-09	0.43	898130	74124	rs329122	824006	TRUE	reported	7h4M83
Mahajan_Type2diabetes	6	7049440	A	T	-0.042	0.0065	1e-10	0.58	898130	74124	rs648795	824006	TRUE	reported	7h4M83
Mahajan_Type2diabetes	6	7231843	G	A	-0.097	0.011	2.29985e-20	0.11	898130	74124	rs9379084	824006	TRUE	reported	7h4M83
Mahajan_Type2diabetes	6	20679709	A	G	0.14	0.007	2.99985e-87	0.27	898130	74124	rs7756992	824006	TRUE	reported	7h4M83
Mahajan_Type2diabetes	6	31524851	C	T	0.061	0.0077	4.79954e-15	0.78	898130	74124	rs2857605	824006	TRUE	reported	7h4M83
Mahajan_Type2diabetes	6	32573415	A	G	0.08	0.0085	2.70023e-21	0.18	898130	74124	rs601945	824006	TRUE	reported	7h4M83
Mahajan_Type2diabetes	6	43814190	C	T	-0.051	0.007	3.69999e-13	0.71	898130	74124	rs6458354	824006	TRUE	reported	7h4M83
Mahajan_Type2diabetes	6	50788778	A	C	0.058	0.0082	1.10002e-12	0.18	898130	74124	rs3798519	824006	TRUE	reported	7h4M83
Mahajan_Type2diabetes	6	107431688	G	A	-0.039	0.0068	1e-08	0.33	898130	74124	rs4946812	824006	TRUE	reported	7h4M83
Mahajan_Type2diabetes	6	126792095	A	G	0.067	0.0075	1.29987e-18	0.23	898130	74124	rs11759026	824006	TRUE	reported	7h4M83
Mahajan_Type2diabetes	6	137302159	T	G	-0.05	0.0064	8.4004e-15	0.46	898130	74124	rs1573090	824006	TRUE	reported	7h4M83
Mahajan_Type2diabetes	6	160770312	A	G	-0.039	0.0063	1e-09	0.48	898130	74124	rs474513	824006	TRUE	reported	7h4M83
Mahajan_Type2diabetes	6	164133001	C	T	-0.056	0.0096	5e-09	0.13	898130	74124	rs4709746	824006	TRUE	reported	7h4M83
Mahajan_Type2diabetes	7	14898282	C	T	0.069	0.0083	6.89922e-17	0.18	898130	74124	rs17168486	824006	TRUE	reported	7h4M83
Mahajan_Type2diabetes	7	15063569	C	T	0.066	0.0063	1.9002e-25	0.54	898130	74124	rs10228066	824006	TRUE	reported	7h4M83
Mahajan_Type2diabetes	7	28198677	C	T	-0.092	0.0063	4.19952e-48	0.49	898130	74124	rs1708302	824006	TRUE	reported	7h4M83
Mahajan_Type2diabetes	7	30728557	A	G	-0.044	0.0075	4.79999e-09	0.25	898130	74124	rs58682124	824006	TRUE	reported	7h4M83
Mahajan_Type2diabetes	7	44255643	G	A	0.057	0.0074	1.59993e-14	0.25	898130	74124	rs878521	824006	TRUE	reported	7h4M83
Mahajan_Type2diabetes	7	102486254	T	C	-0.047	0.0083	1.2e-08	0.18	898130	74124	rs11496066	824006	TRUE	reported	7h4M83
Mahajan_Type2diabetes	7	117495667	C	A	0.042	0.0073	1.5e-08	0.31	898130	74124	rs6976111	824006	TRUE	reported	7h4M83
Mahajan_Type2diabetes	7	130457914	A	G	0.058	0.0069	7.59976e-17	0.32	898130	74124	rs1562396	824006	TRUE	reported	7h4M83
Mahajan_Type2diabetes	7	150541189	A	T	0.044	0.0076	1.09999e-08	0.22	898130	74124	rs1117610	824006	TRUE	reported	7h4M83
Mahajan_Type2diabetes	7	156930550	G	C	-0.058	0.0068	3.90032e-17	0.33	898130	74124	rs6459733	824006	TRUE	reported	7h4M83
Mahajan_Type2diabetes	8	9974824	G	A	-0.048	0.0064	1.69981e-13	0.47	898130	74124	rs17689007	824006	TRUE	reported	7h4M83
Mahajan_Type2diabetes	8	19812812	C	T	-0.048	0.0085	1.40001e-08	0.17	898130	74124	rs263	824006	TRUE	reported	7h4M83
Mahajan_Type2diabetes	8	30863938	T	C	-0.041	0.0068	2.30001e-09	0.69	898130	74124	rs10954772	824006	TRUE	reported	7h4M83
Mahajan_Type2diabetes	8	41508577	C	A	-0.094	0.0087	1.80011e-27	0.17	898130	74124	rs13262861	824006	TRUE	reported	7h4M83
Mahajan_Type2diabetes	8	95961626	T	C	-0.051	0.0063	1.10002e-15	0.52	898130	74124	rs10097617	824006	TRUE	reported	7h4M83
Mahajan_Type2diabetes	8	118185025	G	A	-0.11	0.0069	6.29941e-55	0.31	898130	74124	rs3802177	824006	TRUE	reported	7h4M83
Mahajan_Type2diabetes	8	128711742	G	A	-0.078	0.013	5e-10	0.085	898130	74124	rs17772814	824006	TRUE	reported	7h4M83
Mahajan_Type2diabetes	8	129568078	C	T	-0.043	0.0071	1.89998e-09	0.73	898130	74124	rs1561927	824006	TRUE	reported	7h4M83
Mahajan_Type2diabetes	8	145507304	C	T	-0.051	0.0067	4.40048e-14	0.63	898130	74124	rs4977213	824006	TRUE	reported	7h4M83
Mahajan_Type2diabetes	8	145879883	T	C	-0.039	0.0064	2.1e-09	0.46	898130	74124	rs12719778	824006	TRUE	reported	7h4M83
Mahajan_Type2diabetes	9	4291928	A	C	0.051	0.0066	1.59993e-14	0.36	898130	74124	rs10974438	824006	TRUE	reported	7h4M83
Mahajan_Type2diabetes	9	19067833	A	G	0.04	0.0064	3.59998e-10	0.4	898130	74124	rs7022807	824006	TRUE	reported	7h4M83
Mahajan_Type2diabetes	9	22060935	A	G	0.054	0.0065	1.29987e-16	0.6	898130	74124	rs2383205	824006	TRUE	reported	7h4M83
Mahajan_Type2diabetes	9	22134068	G	A	-0.16	0.0086	6.59933e-79	0.17	898130	74124	rs10811660	824006	TRUE	reported	7h4M83
Mahajan_Type2diabetes	9	28410683	T	C	0.043	0.0068	2.5e-10	0.32	898130	74124	rs1412234	824006	TRUE	reported	7h4M83
Mahajan_Type2diabetes	9	34074476	T	C	0.041	0.0065	3.69999e-10	0.37	898130	74124	rs12001437	824006	TRUE	reported	7h4M83
Mahajan_Type2diabetes	9	81905590	A	G	-0.1	0.013	2.90001e-14	0.07	898130	74124	rs17791513	824006	TRUE	reported	7h4M83
Mahajan_Type2diabetes	9	84308948	G	A	-0.066	0.0065	8.49963e-24	0.41	898130	74124	rs2796441	824006	TRUE	reported	7h4M83
Mahajan_Type2diabetes	9	97001682	A	C	-0.043	0.0072	3.2e-09	0.27	898130	74124	rs55653563	824006	TRUE	reported	7h4M83
Mahajan_Type2diabetes	9	136155000	C	T	0.05	0.0082	8e-10	0.19	898130	74124	rs635634	824006	TRUE	reported	7h4M83
Mahajan_Type2diabetes	9	139241030	A	G	0.076	0.0081	2.60016e-21	0.75	898130	74124	rs28505901	824006	TRUE	reported	7h4M83
Mahajan_Type2diabetes	10	12307894	C	T	0.09	0.0076	3.69999e-32	0.22	898130	74124	rs11257655	824006	TRUE	reported	7h4M83
Mahajan_Type2diabetes	10	71335802	G	A	-0.044	0.007	3.2e-10	0.3	898130	74124	rs12769661	824006	TRUE	reported	7h4M83
Mahajan_Type2diabetes	10	71466637	A	C	0.044	0.0064	6.09958e-12	0.46	898130	74124	rs2812541	824006	TRUE	reported	7h4M83
Mahajan_Type2diabetes	10	80952826	G	C	-0.071	0.0064	2.49977e-28	0.47	898130	74124	rs703972	824006	TRUE	reported	7h4M83
Mahajan_Type2diabetes	10	94462427	T	C	-0.11	0.0064	1.59993e-62	0.41	898130	74124	rs10882101	824006	TRUE	reported	7h4M83
Mahajan_Type2diabetes	10	114668249	C	T	0.17	0.021	9.20026e-16	0.023	898130	74124	rs114222749	824006	TRUE	reported	7h4M83
Mahajan_Type2diabetes	10	114681965	G	A	-0.28	0.036	1e-14	0.0099	898130	74124	rs116425039	824006	TRUE	reported	7h4M83
Mahajan_Type2diabetes	10	114749734	G	A	0.28	0.0075	1e-200	0.23	898130	74124	rs35011184	824006	TRUE	reported	7h4M83
Mahajan_Type2diabetes	10	124180176	G	A	-0.039	0.0066	5.19996e-09	0.35	898130	74124	rs35777422	824006	TRUE	reported	7h4M83
Mahajan_Type2diabetes	11	2111386	G	C	0.045	0.0082	3.89996e-08	0.19	898130	74124	rs76223293	824006	TRUE	reported	7h4M83
Mahajan_Type2diabetes	11	2197286	A	G	-0.07	0.0067	4.79954e-25	0.62	898130	74124	rs4929965	824006	TRUE	reported	7h4M83
Mahajan_Type2diabetes	11	2692249	C	T	0.06	0.0066	2.90001e-19	0.4	898130	74124	rs231360	824006	TRUE	reported	7h4M83
Mahajan_Type2diabetes	11	2857194	A	C	0.093	0.0066	3.59998e-44	0.43	898130	74124	rs2237895	824006	TRUE	reported	7h4M83
Mahajan_Type2diabetes	11	14763828	C	A	0.12	0.021	2.80001e-08	0.024	898130	74124	rs141521721	824006	TRUE	reported	7h4M83
Mahajan_Type2diabetes	11	17408630	C	T	-0.07	0.0065	1.99986e-26	0.63	898130	74124	rs5215	824006	TRUE	reported	7h4M83
Mahajan_Type2diabetes	11	32927778	G	T	-0.11	0.016	1.10002e-11	0.043	898130	74124	rs145678014	824006	TRUE	reported	7h4M83
Mahajan_Type2diabetes	11	34982148	C	A	-0.039	0.0069	2.5e-08	0.71	898130	74124	rs2767036	824006	TRUE	reported	7h4M83
Mahajan_Type2diabetes	11	43877934	C	A	0.05	0.007	8.49963e-13	0.29	898130	74124	rs1061810	824006	TRUE	reported	7h4M83
Mahajan_Type2diabetes	11	47604639	C	T	0.037	0.0064	9.20005e-09	0.41	898130	74124	rs12798028	824006	TRUE	reported	7h4M83
Mahajan_Type2diabetes	11	65294799	C	T	0.061	0.008	1.39991e-14	0.2	898130	74124	rs1783541	824006	TRUE	reported	7h4M83
Mahajan_Type2diabetes	11	72460398	A	C	-0.11	0.0088	2.29985e-33	0.16	898130	74124	rs77464186	824006	TRUE	reported	7h4M83
Mahajan_Type2diabetes	11	92708710	C	G	0.099	0.0071	1.50003e-43	0.28	898130	74124	rs10830963	824006	TRUE	reported	7h4M83
Mahajan_Type2diabetes	11	93057924	G	A	0.04	0.0068	3.89996e-09	0.68	898130	74124	rs3020067	824006	TRUE	reported	7h4M83
Mahajan_Type2diabetes	11	128044159	C	T	-0.054	0.0094	7.49998e-09	0.13	898130	74124	rs10893830	824006	TRUE	reported	7h4M83
Mahajan_Type2diabetes	11	128234144	A	G	-0.045	0.007	2e-10	0.72	898130	74124	rs10750397	824006	TRUE	reported	7h4M83
Mahajan_Type2diabetes	11	128398938	C	T	0.056	0.008	1.39991e-12	0.21	898130	74124	rs67232546	824006	TRUE	reported	7h4M83
Mahajan_Type2diabetes	12	4288001	T	C	0.053	0.0084	1.6e-10	0.18	898130	74124	rs11063018	824006	TRUE	reported	7h4M83
Mahajan_Type2diabetes	12	4376089	C	T	-0.058	0.008	3.29989e-13	0.79	898130	74124	rs4238013	824006	TRUE	reported	7h4M83
Mahajan_Type2diabetes	12	4384844	T	G	-0.48	0.027	5.30029e-70	0.02	898130	74124	rs76895963	824006	TRUE	reported	7h4M83
Mahajan_Type2diabetes	12	26253557	A	C	0.037	0.0065	1.7e-08	0.39	898130	74124	rs10771260	824006	TRUE	reported	7h4M83
Mahajan_Type2diabetes	12	27965150	C	T	-0.074	0.0081	2.49977e-20	0.19	898130	74124	rs10842994	824006	TRUE	reported	7h4M83
Mahajan_Type2diabetes	12	66221060	A	T	0.11	0.011	1.99986e-25	0.1	898130	74124	rs2258238	824006	TRUE	reported	7h4M83
Mahajan_Type2diabetes	12	66347368	G	T	0.037	0.0065	2e-08	0.4	898130	74124	rs7959830	824006	TRUE	reported	7h4M83
Mahajan_Type2diabetes	12	71522953	G	C	-0.049	0.0064	3.19963e-14	0.43	898130	74124	rs1796330	824006	TRUE	reported	7h4M83
Mahajan_Type2diabetes	12	95928560	C	T	0.035	0.0063	4.39997e-08	0.54	898130	74124	rs2197973	824006	TRUE	reported	7h4M83
Mahajan_Type2diabetes	12	97848775	A	G	-0.073	0.013	2.19999e-08	0.07	898130	74124	rs77864822	824006	TRUE	reported	7h4M83
Mahajan_Type2diabetes	12	108629780	G	A	-0.05	0.0073	1.10002e-11	0.26	898130	74124	rs1426371	824006	TRUE	reported	7h4M83
Mahajan_Type2diabetes	12	118412373	G	A	0.054	0.0092	3.50002e-09	0.14	898130	74124	rs34965774	824006	TRUE	reported	7h4M83
Mahajan_Type2diabetes	12	121432117	G	C	-0.062	0.0069	3.80014e-19	0.31	898130	74124	rs56348580	824006	TRUE	reported	7h4M83
Mahajan_Type2diabetes	12	123593485	T	A	-0.048	0.008	1.79999e-09	0.21	898130	74124	rs7299943	824006	TRUE	reported	7h4M83
Mahajan_Type2diabetes	12	133069698	G	A	0.049	0.007	2.39994e-12	0.33	898130	74124	rs12811407	824006	TRUE	reported	7h4M83
Mahajan_Type2diabetes	13	26776999	A	G	-0.048	0.0075	2.90001e-10	0.24	898130	74124	rs34584161	824006	TRUE	reported	7h4M83
Mahajan_Type2diabetes	13	31042452	G	T	-0.042	0.0073	1.5e-08	0.27	898130	74124	rs11842871	824006	TRUE	reported	7h4M83
Mahajan_Type2diabetes	13	59077406	A	T	-0.042	0.007	3.89996e-09	0.29	898130	74124	rs9563615	824006	TRUE	reported	7h4M83
Mahajan_Type2diabetes	13	80717156	G	A	-0.083	0.0071	5.70033e-31	0.28	898130	74124	rs1359790	824006	TRUE	reported	7h4M83
Mahajan_Type2diabetes	13	109947213	T	C	-0.036	0.0065	4.09996e-08	0.39	898130	74124	rs7987740	824006	TRUE	reported	7h4M83
Mahajan_Type2diabetes	14	23288935	C	G	0.043	0.0077	2e-08	0.23	898130	74124	rs17122772	824006	TRUE	reported	7h4M83
Mahajan_Type2diabetes	14	33302882	G	T	0.038	0.0064	4e-09	0.47	898130	74124	rs17522122	824006	TRUE	reported	7h4M83
Mahajan_Type2diabetes	14	38848357	T	A	-0.041	0.0073	2.80001e-08	0.26	898130	74124	rs8018574	824006	TRUE	reported	7h4M83
Mahajan_Type2diabetes	14	79932041	G	C	0.058	0.0077	9.70063e-14	0.22	898130	74124	rs17836088	824006	TRUE	reported	7h4M83
Mahajan_Type2diabetes	14	91963722	A	G	0.038	0.0066	8.10009e-09	0.42	898130	74124	rs8010382	824006	TRUE	reported	7h4M83
Mahajan_Type2diabetes	14	103894071	G	T	-0.037	0.0067	3.79997e-08	0.35	898130	74124	rs62007683	824006	TRUE	reported	7h4M83
Mahajan_Type2diabetes	15	38873115	T	C	0.076	0.01	3.29989e-14	0.12	898130	74124	rs34715063	824006	TRUE	reported	7h4M83
Mahajan_Type2diabetes	15	41857303	T	C	0.044	0.0069	3.09999e-10	0.3	898130	74124	rs2277536	824006	TRUE	reported	7h4M83
Mahajan_Type2diabetes	15	53097088	C	G	0.041	0.0074	4.30002e-08	0.25	898130	74124	rs2440374	824006	TRUE	reported	7h4M83
Mahajan_Type2diabetes	15	62394264	G	C	-0.047	0.0064	3.69999e-13	0.43	898130	74124	rs8037894	824006	TRUE	reported	7h4M83
Mahajan_Type2diabetes	15	63871292	C	T	-0.039	0.0063	7.00003e-10	0.54	898130	74124	rs7178762	824006	TRUE	reported	7h4M83
Mahajan_Type2diabetes	15	77818128	C	A	0.079	0.007	5.70033e-29	0.72	898130	74124	rs1005752	824006	TRUE	reported	7h4M83
Mahajan_Type2diabetes	15	90423293	T	C	-0.065	0.0071	7.19946e-20	0.73	898130	74124	rs4932265	824006	TRUE	reported	7h4M83
Mahajan_Type2diabetes	15	91513157	T	A	0.065	0.0092	1.50003e-12	0.14	898130	74124	rs2890156	824006	TRUE	reported	7h4M83
Mahajan_Type2diabetes	16	295795	T	C	-0.061	0.0085	7.00003e-13	0.18	898130	74124	rs6600191	824006	TRUE	reported	7h4M83
Mahajan_Type2diabetes	16	3583173	C	T	0.044	0.0077	1.7e-08	0.22	898130	74124	rs3751837	824006	TRUE	reported	7h4M83
Mahajan_Type2diabetes	16	30045789	C	G	0.042	0.0065	1.2e-10	0.4	898130	74124	rs11642430	824006	TRUE	reported	7h4M83
Mahajan_Type2diabetes	16	53800954	T	C	0.12	0.0064	2.39994e-78	0.42	898130	74124	rs1421085	824006	TRUE	reported	7h4M83
Mahajan_Type2diabetes	16	69923333	T	C	0.038	0.0064	5.30005e-09	0.57	898130	74124	rs7196842	824006	TRUE	reported	7h4M83
Mahajan_Type2diabetes	16	75234872	C	A	-0.13	0.012	1.29987e-27	0.077	898130	74124	rs72802342	824006	TRUE	reported	7h4M83
Mahajan_Type2diabetes	16	89564055	T	A	0.053	0.009	2.90001e-09	0.16	898130	74124	rs12920022	824006	TRUE	reported	7h4M83
Mahajan_Type2diabetes	17	4045440	G	C	0.057	0.0068	5.70033e-17	0.31	898130	74124	rs1377807	824006	TRUE	reported	7h4M83
Mahajan_Type2diabetes	17	9785187	G	C	0.039	0.0068	1.7e-08	0.32	898130	74124	rs7222481	824006	TRUE	reported	7h4M83
Mahajan_Type2diabetes	17	17661802	A	G	-0.048	0.0068	3.90032e-12	0.68	898130	74124	rs4925109	824006	TRUE	reported	7h4M83
Mahajan_Type2diabetes	17	36063685	G	A	-0.06	0.0097	6.49995e-10	0.13	898130	74124	rs2189301	824006	TRUE	reported	7h4M83
Mahajan_Type2diabetes	17	36099952	T	A	-0.074	0.0064	3.10027e-30	0.52	898130	74124	rs10908278	824006	TRUE	reported	7h4M83
Mahajan_Type2diabetes	17	40810228	C	T	0.091	0.015	1.6e-09	0.048	898130	74124	rs75524028	824006	TRUE	reported	7h4M83
Mahajan_Type2diabetes	17	47060322	C	A	-0.055	0.0069	3.80014e-15	0.32	898130	74124	rs35895680	824006	TRUE	reported	7h4M83
Mahajan_Type2diabetes	17	62203304	C	T	0.052	0.0095	2.90001e-08	0.14	898130	74124	rs60276348	824006	TRUE	reported	7h4M83
Mahajan_Type2diabetes	17	65892507	G	C	0.055	0.0081	1e-11	0.19	898130	74124	rs61676547	824006	TRUE	reported	7h4M83
Mahajan_Type2diabetes	18	7070642	T	C	0.037	0.0065	2e-08	0.38	898130	74124	rs7240767	824006	TRUE	reported	7h4M83
Mahajan_Type2diabetes	18	36278709	T	C	0.056	0.0098	9.09997e-09	0.12	898130	74124	rs62080313	824006	TRUE	reported	7h4M83
Mahajan_Type2diabetes	18	56878274	C	T	-0.046	0.0082	1.79999e-08	0.19	898130	74124	rs1517037	824006	TRUE	reported	7h4M83
Mahajan_Type2diabetes	18	57848369	A	T	0.056	0.0074	7.50067e-14	0.24	898130	74124	rs523288	824006	TRUE	reported	7h4M83
Mahajan_Type2diabetes	19	7970635	A	G	-0.047	0.0066	1.10002e-12	0.61	898130	74124	rs4804833	824006	TRUE	reported	7h4M83
Mahajan_Type2diabetes	19	13038415	G	A	0.046	0.0065	1.59993e-12	0.59	898130	74124	rs3111316	824006	TRUE	reported	7h4M83
Mahajan_Type2diabetes	19	19388500	A	T	0.093	0.012	6.29941e-15	0.08	898130	74124	rs8107974	824006	TRUE	reported	7h4M83
Mahajan_Type2diabetes	19	33890838	C	G	-0.035	0.0064	4.60002e-08	0.48	898130	74124	rs10406327	824006	TRUE	reported	7h4M83
Mahajan_Type2diabetes	19	45411941	T	C	-0.08	0.0092	1.80011e-18	0.15	898130	74124	rs429358	824006	TRUE	reported	7h4M83
Mahajan_Type2diabetes	19	46157019	A	G	-0.059	0.0065	2.49977e-19	0.44	898130	74124	rs10406431	824006	TRUE	reported	7h4M83
Mahajan_Type2diabetes	19	47602577	T	A	0.045	0.0076	4e-09	0.76	898130	74124	rs9304665	824006	TRUE	reported	7h4M83
Mahajan_Type2diabetes	20	21466795	T	C	0.058	0.01	1.29999e-08	0.11	898130	74124	rs13041756	824006	TRUE	reported	7h4M83
Mahajan_Type2diabetes	20	32596704	G	A	0.043	0.0067	2.90001e-10	0.66	898130	74124	rs2268078	824006	TRUE	reported	7h4M83
Mahajan_Type2diabetes	20	43042364	C	T	0.16	0.017	3.19963e-20	0.035	898130	74124	rs1800961	824006	TRUE	reported	7h4M83
Mahajan_Type2diabetes	20	45581777	G	C	-0.041	0.0064	1.29999e-10	0.57	898130	74124	rs1999536	824006	TRUE	reported	7h4M83
Mahajan_Type2diabetes	20	48832135	C	T	-0.043	0.0064	2.49977e-11	0.46	898130	74124	rs11699802	824006	TRUE	reported	7h4M83
Mahajan_Type2diabetes	20	57394628	C	G	0.044	0.0063	3.19963e-12	0.52	898130	74124	rs6070625	824006	TRUE	reported	7h4M83
Mahajan_Type2diabetes	22	30609554	A	G	0.083	0.012	9.60064e-13	0.914	898130	74124	rs6518681	824006	TRUE	reported	7h4M83
Mahajan_Type2diabetes	22	32378613	A	G	-0.075	0.014	3.59998e-08	0.07	898130	74124	rs116989257	824006	TRUE	reported	7h4M83
Mahajan_Type2diabetes	22	41489920	G	A	0.038	0.007	4.60002e-08	0.72	898130	74124	rs5758223	824006	TRUE	reported	7h4M83
Mahajan_Type2diabetes	22	50356850	C	T	-0.048	0.0074	1.5e-10	0.72	898130	74124	rs1801645	824006	TRUE	reported	7h4M83
NAFLD	8	126500031	C	G	-0.110033	0.0164425	2.20191e-11	0.592445	778614	8434	rs28601761	770180	TRUE	reported	l8E6mK
NAFLD	19	19460541	G	C	0.281009	0.0326406	7.35699e-18	0.063618	778614	8434	rs73001065	770180	TRUE	reported	l8E6mK
NAFLD	19	45411941	T	C	-0.136615	0.0239288	1.13501e-08	0.84493	778614	8434	rs429358	770180	TRUE	reported	l8E6mK
NAFLD	22	44324855	G	A	0.288601	0.019822	5.07341e-48	0.222664	778614	8434	rs3747207	770180	TRUE	reported	l8E6mK
Scott_Type2Diabetes	1	214159256	T	C	0.068	0.012	3.40001e-08	0.530815	159208	26676	rs340874	132532	TRUE	reported	DNTiWA
Scott_Type2Diabetes	1	219771721	C	T	-0.077	0.013	8.79995e-09	0.276342	159208	26676	rs4846569	132532	TRUE	reported	DNTiWA
Scott_Type2Diabetes	2	43734847	C	T	-0.13	0.021	1.89998e-10	0.0894632	159208	26676	rs6757251	132532	TRUE	reported	DNTiWA
Scott_Type2Diabetes	2	60552476	T	C	-0.071	0.012	1.29999e-08	0.409543	159208	26676	rs10193447	132532	TRUE	reported	DNTiWA
Scott_Type2Diabetes	2	227117778	C	G	0.076	0.013	1.2e-09	0.628231	159208	26676	rs2972156	132532	TRUE	reported	DNTiWA
Scott_Type2Diabetes	3	12344730	C	G	-0.13	0.019	8.60003e-13	0.120278	159208	26676	rs11712037	132532	TRUE	reported	DNTiWA
Scott_Type2Diabetes	3	23455582	T	C	-0.083	0.015	1.5e-08	0.22167	159208	26676	rs35352848	132532	TRUE	reported	DNTiWA
Scott_Type2Diabetes	3	64710850	T	C	-0.07	0.012	1e-08	0.439364	159208	26676	rs7428936	132532	TRUE	reported	DNTiWA
Scott_Type2Diabetes	3	123065778	A	G	-0.11	0.015	8.80035e-13	0.170974	159208	26676	rs11708067	132532	TRUE	reported	DNTiWA
Scott_Type2Diabetes	3	185511687	G	T	0.14	0.013	2.70023e-25	0.304175	159208	26676	rs4402960	132532	TRUE	reported	DNTiWA
Scott_Type2Diabetes	4	6299940	C	T	0.1	0.012	4.19952e-16	0.565606	159208	26676	rs3821943	132532	TRUE	reported	DNTiWA
Scott_Type2Diabetes	5	55861464	C	T	0.1	0.016	7.39997e-10	0.177932	159208	26676	rs28650790	132532	TRUE	reported	DNTiWA
Scott_Type2Diabetes	6	20673880	T	C	0.17	0.013	3.80014e-37	0.280318	159208	26676	rs7451008	132532	TRUE	reported	DNTiWA
Scott_Type2Diabetes	6	126792095	A	G	0.091	0.015	5.80003e-10	0.254473	159208	26676	rs11759026	132532	TRUE	reported	DNTiWA
Scott_Type2Diabetes	7	15062983	T	C	0.069	0.012	1.40001e-08	0.507952	159208	26676	rs2215383	132532	TRUE	reported	DNTiWA
Scott_Type2Diabetes	7	28189411	T	C	-0.092	0.012	2.99985e-14	0.518887	159208	26676	rs1635852	132532	TRUE	reported	DNTiWA
Scott_Type2Diabetes	8	118185025	G	A	-0.11	0.013	1.69981e-17	0.2833	159208	26676	rs3802177	132532	TRUE	reported	DNTiWA
Scott_Type2Diabetes	8	145536056	A	G	0.076	0.013	1.89998e-08	0.389662	159208	26676	rs62530366	132532	TRUE	reported	DNTiWA
Scott_Type2Diabetes	9	22067004	G	A	0.077	0.012	4e-10	0.599404	159208	26676	rs10965223	132532	TRUE	reported	DNTiWA
Scott_Type2Diabetes	9	22133284	G	A	-0.14	0.016	2.70023e-17	0.166998	159208	26676	rs10965250	132532	TRUE	reported	DNTiWA
Scott_Type2Diabetes	9	84311800	T	C	-0.073	0.013	2e-08	0.416501	159208	26676	rs9410573	132532	TRUE	reported	DNTiWA
Scott_Type2Diabetes	10	12309269	C	T	0.081	0.015	2.69998e-08	0.227634	159208	26676	rs11257659	132532	TRUE	reported	DNTiWA
Scott_Type2Diabetes	10	80942620	C	T	-0.089	0.013	1.29987e-12	0.450298	159208	26676	rs810517	132532	TRUE	reported	DNTiWA
Scott_Type2Diabetes	10	94444793	C	T	-0.13	0.012	1.39991e-26	0.422465	159208	26676	rs10882098	132532	TRUE	reported	DNTiWA
Scott_Type2Diabetes	10	114758349	C	T	0.29	0.013	9.28966e-108	0.317097	159208	26676	rs7903146	132532	TRUE	reported	DNTiWA
Scott_Type2Diabetes	11	2692249	C	T	0.079	0.013	9.49992e-10	0.377734	159208	26676	rs231360	132532	TRUE	reported	DNTiWA
Scott_Type2Diabetes	11	2857194	A	C	0.097	0.013	1.69981e-13	0.419483	159208	26676	rs2237895	132532	TRUE	reported	DNTiWA
Scott_Type2Diabetes	11	17409572	T	C	-0.068	0.012	4.30002e-08	0.647117	159208	26676	rs5219	132532	TRUE	reported	DNTiWA
Scott_Type2Diabetes	11	43877934	C	A	0.08	0.014	5.30005e-09	0.303181	159208	26676	rs1061810	132532	TRUE	reported	DNTiWA
Scott_Type2Diabetes	11	72428172	A	G	-0.096	0.016	3.79997e-09	0.151093	159208	26676	rs76550717	132532	TRUE	reported	DNTiWA
Scott_Type2Diabetes	12	4376089	C	T	-0.099	0.017	3.59998e-09	0.802187	159208	26676	rs4238013	132532	TRUE	reported	DNTiWA
Scott_Type2Diabetes	12	121432117	G	C	-0.073	0.013	2.5e-08	0.303181	159208	26676	rs56348580	132532	TRUE	reported	DNTiWA
Scott_Type2Diabetes	13	80705315	G	T	-0.09	0.014	3.90032e-11	0.26839	159208	26676	rs11616380	132532	TRUE	reported	DNTiWA
Scott_Type2Diabetes	15	62117975	C	T	-0.075	0.013	2.69998e-08	0.293241	159208	26676	rs4774420	132532	TRUE	reported	DNTiWA
Scott_Type2Diabetes	15	77776498	C	G	0.082	0.013	4e-10	0.692843	159208	26676	rs952471	132532	TRUE	reported	DNTiWA
Scott_Type2Diabetes	16	53803574	T	A	0.13	0.012	4.70002e-25	0.432406	159208	26676	rs1558902	132532	TRUE	reported	DNTiWA
Scott_Type2Diabetes	16	75252327	G	A	-0.15	0.023	3.69999e-11	0.0884692	159208	26676	rs8056814	132532	TRUE	reported	DNTiWA
Scott_Type2Diabetes	17	36102833	G	A	-0.083	0.014	1.09999e-09	0.426441	159208	26676	rs757209	132532	TRUE	reported	DNTiWA
Scott_Type2Diabetes	19	45411941	T	C	-0.12	0.019	1.40001e-10	0.15507	159208	26676	rs429358	132532	TRUE	reported	DNTiWA
Scott_Type2Diabetes	22	30599562	A	G	0.12	0.021	3.89996e-09	0.937376	159208	26676	rs2023681	132532	TRUE	reported	DNTiWA
BMI_UKB	1	1601052	G	A	-0.021277	0.00228001	1e-20	0.259858	461460		rs72634826		TRUE	reported	xdcZ5D
BMI_UKB	1	2723214	C	A	-0.014837	0.00198775	8.4004e-14	0.466824	461460		rs4648450		TRUE	reported	xdcZ5D
BMI_UKB	1	6657424	C	A	0.0117835	0.00206546	1.2e-08	0.355683	461460		rs3866805		TRUE	reported	xdcZ5D
BMI_UKB	1	11207269	C	T	-0.0133837	0.00231332	7.19996e-09	0.761794	461460		rs2791643		TRUE	reported	xdcZ5D
BMI_UKB	1	16859325	A	G	0.0116661	0.0019948	5e-09	0.491021	461460		rs78886584		TRUE	reported	xdcZ5D
BMI_UKB	1	19934900	G	A	-0.0135153	0.00231885	5.60003e-09	0.237203	461460		rs61740466		TRUE	reported	xdcZ5D
BMI_UKB	1	23313353	T	G	-0.0182237	0.00264876	6.00067e-12	0.833718	461460		rs10799778		TRUE	reported	xdcZ5D
BMI_UKB	1	32197257	G	A	0.016056	0.0026141	8.10009e-10	0.17196	461460		rs3766823		TRUE	reported	xdcZ5D
BMI_UKB	1	33784146	T	C	0.0131586	0.00210047	3.69999e-10	0.673081	461460		rs6682438		TRUE	reported	xdcZ5D
BMI_UKB	1	39564930	C	T	0.0186013	0.00242689	1.80011e-14	0.21205	461460		rs113603865		TRUE	reported	xdcZ5D
BMI_UKB	1	47678458	A	G	-0.0170287	0.0019986	1.59993e-17	0.582679	461460		rs6669341		TRUE	reported	xdcZ5D
BMI_UKB	1	49996959	G	A	-0.0192649	0.00213109	1.59993e-19	0.681309	461460		rs1167311		TRUE	reported	xdcZ5D
BMI_UKB	1	62579891	G	T	-0.033075	0.0034589	1.20005e-21	0.094252	461460		rs12140153		TRUE	reported	xdcZ5D
BMI_UKB	1	66434743	G	A	0.0140028	0.00198381	1.69981e-12	0.52836	461460		rs7519259		TRUE	reported	xdcZ5D
BMI_UKB	1	72765116	G	A	0.0222928	0.00201204	1.59993e-28	0.603656	461460		rs2568958		TRUE	reported	xdcZ5D
BMI_UKB	1	75011358	C	T	0.0171368	0.00201682	1.9002e-17	0.401588	461460		rs6669189		TRUE	reported	xdcZ5D
BMI_UKB	1	78450517	C	A	0.038848	0.00304983	3.59998e-37	0.121787	461460		rs34517439		TRUE	reported	xdcZ5D
BMI_UKB	1	80812020	G	C	0.0137805	0.00214061	1.2e-10	0.303943	461460		rs6696828		TRUE	reported	xdcZ5D
BMI_UKB	1	91189933	G	A	-0.0123121	0.00198606	5.69994e-10	0.54861	461460		rs12089815		TRUE	reported	xdcZ5D
BMI_UKB	1	96924097	C	T	0.0193319	0.00200337	4.90004e-22	0.590103	461460		rs11165643		TRUE	reported	xdcZ5D
BMI_UKB	1	98315893	A	G	0.0157008	0.00236691	3.29989e-11	0.224478	461460		rs12072739		TRUE	reported	xdcZ5D
BMI_UKB	1	110082551	T	G	0.0684263	0.0062225	4.00037e-28	0.025988	461460		rs41279738		TRUE	reported	xdcZ5D
BMI_UKB	1	112324111	A	T	0.0143963	0.0020317	1.39991e-12	0.381481	461460		rs2618039		TRUE	reported	xdcZ5D
BMI_UKB	1	115295160	T	C	0.0140931	0.00241434	5.30005e-09	0.210864	461460		rs17544384		TRUE	reported	xdcZ5D
BMI_UKB	1	156049877	C	T	0.0290259	0.00292038	2.80027e-23	0.135728	461460		rs61813324		TRUE	reported	xdcZ5D
BMI_UKB	1	156489974	G	A	0.0140775	0.00205596	7.50067e-12	0.362165	461460		rs1778830		TRUE	reported	xdcZ5D
BMI_UKB	1	174321997	G	A	0.0224585	0.00315913	1.20005e-12	0.10925	461460		rs61828641		TRUE	reported	xdcZ5D
BMI_UKB	1	177889025	A	C	0.0495291	0.0024426	1.99986e-91	0.204942	461460		rs539515		TRUE	reported	xdcZ5D
BMI_UKB	1	190294726	T	C	-0.016485	0.00198582	1e-16	0.563148	461460		rs815163		TRUE	reported	xdcZ5D
BMI_UKB	1	195148296	C	G	-0.0164862	0.00243278	1.20005e-11	0.210623	461460		rs76702514		TRUE	reported	xdcZ5D
BMI_UKB	1	201800511	T	G	0.024161	0.00208158	3.80014e-31	0.340162	461460		rs2678204		TRUE	reported	xdcZ5D
BMI_UKB	1	209218583	C	G	-0.0130522	0.00202513	1.2e-10	0.615007	461460		rs4562625		TRUE	reported	xdcZ5D
BMI_UKB	1	210301331	C	T	0.0120066	0.00201565	2.59998e-09	0.399941	461460		rs7516554		TRUE	reported	xdcZ5D
BMI_UKB	1	230301811	T	G	-0.0116316	0.00202425	9.09997e-09	0.611739	461460		rs11122450		TRUE	reported	xdcZ5D
BMI_UKB	1	243557659	T	C	-0.0168156	0.00281467	2.30001e-09	0.143704	461460		rs10927006		TRUE	reported	xdcZ5D
BMI_UKB	1	243832560	C	T	-0.0188877	0.00264997	1e-12	0.833659	461460		rs4658403		TRUE	reported	xdcZ5D
BMI_UKB	2	239597	C	G	-0.0116835	0.00206707	1.6e-08	0.348174	461460		rs6710091		TRUE	reported	xdcZ5D
BMI_UKB	2	422144	T	C	-0.0911559	0.00460882	4.60045e-87	0.048327	461460		rs62107261		TRUE	reported	xdcZ5D
BMI_UKB	2	628504	A	G	0.0554684	0.00261213	4.49987e-100	0.828299	461460		rs6744646		TRUE	reported	xdcZ5D
BMI_UKB	2	6169351	A	G	-0.0158916	0.00225454	1.80011e-12	0.260545	461460		rs7571496		TRUE	reported	xdcZ5D
BMI_UKB	2	10982487	C	T	0.0157557	0.00286187	3.69999e-08	0.139295	461460		rs56930105		TRUE	reported	xdcZ5D
BMI_UKB	2	25145173	T	A	0.033385	0.00196986	1.99986e-64	0.487541	461460		rs59086897		TRUE	reported	xdcZ5D
BMI_UKB	2	26949366	G	A	-0.0161066	0.00197292	3.19963e-16	0.506805	461460		rs935166		TRUE	reported	xdcZ5D
BMI_UKB	2	35447243	G	A	-0.0136501	0.00234795	6.1e-09	0.228388	461460		rs13012070		TRUE	reported	xdcZ5D
BMI_UKB	2	40291940	G	C	-0.0135736	0.00202799	2.19989e-11	0.401882	461460		rs6713781		TRUE	reported	xdcZ5D
BMI_UKB	2	41703383	G	A	0.0114221	0.00204487	2.30001e-08	0.370925	461460		rs12712767		TRUE	reported	xdcZ5D
BMI_UKB	2	47019521	G	A	-0.0171009	0.00205627	9.09913e-17	0.363205	461460		rs35809007		TRUE	reported	xdcZ5D
BMI_UKB	2	50742025	C	T	-0.016303	0.00208355	5.10035e-15	0.339341	461460		rs10184537		TRUE	reported	xdcZ5D
BMI_UKB	2	55320173	T	C	-0.0146168	0.00204919	9.79941e-13	0.37596	461460		rs6705567		TRUE	reported	xdcZ5D
BMI_UKB	2	58933591	C	T	-0.0212558	0.00198918	1.20005e-26	0.555423	461460		rs1861410		TRUE	reported	xdcZ5D
BMI_UKB	2	59307725	G	A	-0.0205219	0.00201573	2.39994e-24	0.601448	461460		rs6545714		TRUE	reported	xdcZ5D
BMI_UKB	2	60217457	C	T	0.0135646	0.00208669	8.00018e-11	0.336228	461460		rs4672338		TRUE	reported	xdcZ5D
BMI_UKB	2	67837553	T	C	-0.0171274	0.00199763	1e-17	0.411984	461460		rs2861685		TRUE	reported	xdcZ5D
BMI_UKB	2	81741750	G	A	0.0125235	0.00211721	3.29997e-09	0.31688	461460		rs6752979		TRUE	reported	xdcZ5D
BMI_UKB	2	86764004	C	T	-0.015965	0.00212268	5.40008e-14	0.686142	461460		rs4832298		TRUE	reported	xdcZ5D
BMI_UKB	2	100123030	A	G	0.0119437	0.00217332	3.89996e-08	0.703627	461460		rs6707827		TRUE	reported	xdcZ5D
BMI_UKB	2	100805996	C	A	-0.0193158	0.00205562	5.60015e-21	0.362038	461460		rs11691869		TRUE	reported	xdcZ5D
BMI_UKB	2	104242992	A	G	0.0130378	0.00197134	3.69999e-11	0.512223	461460		rs10182416		TRUE	reported	xdcZ5D
BMI_UKB	2	105460333	C	T	0.0176118	0.00219724	1.10002e-15	0.281945	461460		rs745249		TRUE	reported	xdcZ5D
BMI_UKB	2	133523605	G	A	0.012611	0.0022826	3.29997e-08	0.25276	461460		rs13033310		TRUE	reported	xdcZ5D
BMI_UKB	2	136389840	C	A	-0.0179406	0.00288163	4.79999e-10	0.131525	461460		rs3213943		TRUE	reported	xdcZ5D
BMI_UKB	2	144035442	T	C	0.0139664	0.00229974	1.29999e-09	0.243837	461460		rs2381404		TRUE	reported	xdcZ5D
BMI_UKB	2	145627927	G	A	0.0186066	0.0031882	5.30005e-09	0.108559	461460		rs6430068		TRUE	reported	xdcZ5D
BMI_UKB	2	147903382	A	G	-0.0173795	0.00199729	3.29989e-18	0.576573	461460		rs429343		TRUE	reported	xdcZ5D
BMI_UKB	2	161265910	C	T	0.0130872	0.00203738	1.29999e-10	0.37185	461460		rs12692596		TRUE	reported	xdcZ5D
BMI_UKB	2	166190881	A	T	-0.0149699	0.00228878	6.09958e-11	0.244987	461460		rs62176243		TRUE	reported	xdcZ5D
BMI_UKB	2	172818467	T	G	0.0137622	0.00247385	2.69998e-08	0.196875	461460		rs56133507		TRUE	reported	xdcZ5D
BMI_UKB	2	175166636	G	A	-0.014947	0.00204032	2.39994e-13	0.392437	461460		rs34234296		TRUE	reported	xdcZ5D
BMI_UKB	2	181599070	C	A	0.0169109	0.00208587	5.19996e-16	0.661966	461460		rs2216931		TRUE	reported	xdcZ5D
BMI_UKB	2	182566998	G	C	-0.0111798	0.00203614	4e-08	0.390446	461460		rs62190049		TRUE	reported	xdcZ5D
BMI_UKB	2	198950240	G	A	0.0149301	0.00197196	3.69999e-14	0.478377	461460		rs1064213		TRUE	reported	xdcZ5D
BMI_UKB	2	204101157	C	T	0.0117507	0.00198303	3.09999e-09	0.557644	461460		rs4625888		TRUE	reported	xdcZ5D
BMI_UKB	2	205375909	C	A	-0.0313175	0.00370692	2.99985e-17	0.923002	461460		rs4482463		TRUE	reported	xdcZ5D
BMI_UKB	2	207936911	A	G	0.0176064	0.00282352	4.49997e-10	0.143824	461460		rs1263629		TRUE	reported	xdcZ5D
BMI_UKB	2	208300941	A	T	0.0127394	0.00232602	4.30002e-08	0.234856	461460		rs10172483		TRUE	reported	xdcZ5D
BMI_UKB	2	212299249	A	C	0.0136616	0.00214059	1.7e-10	0.307299	461460		rs73985439		TRUE	reported	xdcZ5D
BMI_UKB	2	213414265	A	G	-0.0181515	0.00224142	5.60015e-16	0.271198	461460		rs13427822		TRUE	reported	xdcZ5D
BMI_UKB	2	220205146	C	T	0.0191046	0.00274403	3.29989e-12	0.847658	461460		rs6725931		TRUE	reported	xdcZ5D
BMI_UKB	2	229010960	A	C	0.0163638	0.00207733	3.29989e-15	0.341595	461460		rs4605363		TRUE	reported	xdcZ5D
BMI_UKB	2	230816703	G	A	-0.0171805	0.00210907	3.80014e-16	0.677659	461460		rs2433733		TRUE	reported	xdcZ5D
BMI_UKB	2	236848488	G	C	-0.0119625	0.00197288	1.29999e-09	0.52717	461460		rs7568228		TRUE	reported	xdcZ5D
BMI_UKB	3	9498143	G	A	0.0207539	0.00325487	1.79999e-10	0.102364	461460		rs62246311		TRUE	reported	xdcZ5D
BMI_UKB	3	12324230	C	T	-0.0140307	0.00219666	1.7e-10	0.285413	461460		rs2920503		TRUE	reported	xdcZ5D
BMI_UKB	3	12926096	T	C	0.01267	0.00212202	2.39999e-09	0.320327	461460		rs2569993		TRUE	reported	xdcZ5D
BMI_UKB	3	20466465	A	G	-0.0124263	0.00212897	5.30005e-09	0.314443	461460		rs62241847		TRUE	reported	xdcZ5D
BMI_UKB	3	25110415	T	A	0.0134537	0.00201061	2.19989e-11	0.588616	461460		rs7619139		TRUE	reported	xdcZ5D
BMI_UKB	3	35676330	T	A	0.0145561	0.0024161	1.7e-09	0.212315	461460		rs13097918		TRUE	reported	xdcZ5D
BMI_UKB	3	42305131	C	G	0.0219925	0.0031093	1.50003e-12	0.886582	461460		rs754635		TRUE	reported	xdcZ5D
BMI_UKB	3	42418446	A	G	-0.0180335	0.00258234	2.90001e-12	0.820684	461460		rs28350		TRUE	reported	xdcZ5D
BMI_UKB	3	44028764	C	T	-0.0125817	0.00198035	2.1e-10	0.470208	461460		rs4017425		TRUE	reported	xdcZ5D
BMI_UKB	3	48085349	A	T	-0.0127854	0.00211292	1.40001e-09	0.679775	461460		rs11919665		TRUE	reported	xdcZ5D
BMI_UKB	3	49920571	T	C	0.0294509	0.00197538	2.90001e-50	0.511652	461460		rs9843653		TRUE	reported	xdcZ5D
BMI_UKB	3	61208619	C	G	-0.0230543	0.00279318	1.50003e-16	0.146029	461460		rs17668356		TRUE	reported	xdcZ5D
BMI_UKB	3	62713263	T	G	0.0140534	0.00213387	4.49987e-11	0.312937	461460		rs557951		TRUE	reported	xdcZ5D
BMI_UKB	3	69925128	G	A	0.0139276	0.00214833	8.99912e-11	0.31062	461460		rs56038322		TRUE	reported	xdcZ5D
BMI_UKB	3	70540347	A	T	0.0141438	0.00243965	6.69993e-09	0.206473	461460		rs76267866		TRUE	reported	xdcZ5D
BMI_UKB	3	83631491	A	C	-0.032737	0.00444673	1.80011e-13	0.05405	461460		rs78605811		TRUE	reported	xdcZ5D
BMI_UKB	3	85806313	G	T	-0.0180478	0.00204174	9.60064e-19	0.375389	461460		rs9876664		TRUE	reported	xdcZ5D
BMI_UKB	3	88254820	T	C	0.0229281	0.00309976	1.39991e-13	0.885569	461460		rs4858940		TRUE	reported	xdcZ5D
BMI_UKB	3	94038085	C	G	-0.0207916	0.00197396	6.09958e-26	0.515371	461460		rs1454687		TRUE	reported	xdcZ5D
BMI_UKB	3	104631603	C	A	0.0154849	0.00200164	1e-14	0.582421	461460		rs9830592		TRUE	reported	xdcZ5D
BMI_UKB	3	108031094	G	A	0.0134619	0.00203996	4.10015e-11	0.616663	461460		rs1471093		TRUE	reported	xdcZ5D
BMI_UKB	3	114371939	T	C	-0.0219584	0.00364437	1.7e-09	0.080747	461460		rs76183894		TRUE	reported	xdcZ5D
BMI_UKB	3	123051230	G	A	-0.011701	0.00214045	4.60002e-08	0.325232	461460		rs9839081		TRUE	reported	xdcZ5D
BMI_UKB	3	131551027	A	G	0.0228192	0.00220796	4.90004e-25	0.278732	461460		rs11709402		TRUE	reported	xdcZ5D
BMI_UKB	3	131876605	C	G	-0.0136071	0.00226874	2e-09	0.743064	461460		rs3851998		TRUE	reported	xdcZ5D
BMI_UKB	3	136328270	T	C	0.0193576	0.00225404	8.9002e-18	0.7405	461460		rs1471740		TRUE	reported	xdcZ5D
BMI_UKB	3	141298124	G	T	0.0370863	0.00435778	1.69981e-17	0.055892	461460		rs2035936		TRUE	reported	xdcZ5D
BMI_UKB	3	154034950	G	C	0.0152715	0.00201314	3.29989e-14	0.407537	461460		rs355777		TRUE	reported	xdcZ5D
BMI_UKB	3	156304750	A	G	-0.0152802	0.0027705	3.50002e-08	0.149405	461460		rs12696039		TRUE	reported	xdcZ5D
BMI_UKB	3	157020444	C	T	0.0126667	0.00226533	2.30001e-08	0.256388	461460		rs56143236		TRUE	reported	xdcZ5D
BMI_UKB	3	157815217	A	T	-0.0117766	0.00205086	9.29994e-09	0.364998	461460		rs1608113		TRUE	reported	xdcZ5D
BMI_UKB	3	170602073	G	A	0.0158525	0.00232007	8.30042e-12	0.237474	461460		rs6444950		TRUE	reported	xdcZ5D
BMI_UKB	3	173114305	A	G	0.0168965	0.0019785	1.29987e-17	0.527829	461460		rs529200		TRUE	reported	xdcZ5D
BMI_UKB	3	183537759	A	C	-0.0138791	0.00208379	2.70023e-11	0.646368	461460		rs2606228		TRUE	reported	xdcZ5D
BMI_UKB	3	185828465	T	C	-0.0303929	0.00254634	7.70016e-33	0.18493	461460		rs73052033		TRUE	reported	xdcZ5D
BMI_UKB	3	196116393	T	A	0.0133088	0.00205674	9.70063e-11	0.358148	461460		rs6774894		TRUE	reported	xdcZ5D
BMI_UKB	4	3298800	T	C	0.0204078	0.00291963	2.80027e-12	0.13254	461460		rs2051559		TRUE	reported	xdcZ5D
BMI_UKB	4	18351898	C	T	0.0148864	0.00198759	6.89922e-14	0.445826	461460		rs66679256		TRUE	reported	xdcZ5D
BMI_UKB	4	20257769	G	A	-0.0115222	0.0020591	2.19999e-08	0.640139	461460		rs6831088		TRUE	reported	xdcZ5D
BMI_UKB	4	25408838	G	A	-0.0285293	0.00234269	4.10015e-34	0.230756	461460		rs34811474		TRUE	reported	xdcZ5D
BMI_UKB	4	28489339	A	T	-0.0225766	0.0028364	1.69981e-15	0.141236	461460		rs73213484		TRUE	reported	xdcZ5D
BMI_UKB	4	31003636	T	G	0.0138553	0.00205652	1.59993e-11	0.364935	461460		rs4261944		TRUE	reported	xdcZ5D
BMI_UKB	4	38556399	G	A	-0.0136291	0.00233909	5.69994e-09	0.247548	461460		rs6531639		TRUE	reported	xdcZ5D
BMI_UKB	4	45181334	A	T	0.0289896	0.0019931	6.29941e-48	0.43475	461460		rs12507026		TRUE	reported	xdcZ5D
BMI_UKB	4	52818664	A	G	0.0118583	0.0021139	2e-08	0.322486	461460		rs2102278		TRUE	reported	xdcZ5D
BMI_UKB	4	55505360	A	G	-0.015012	0.00198302	3.69999e-14	0.553308	461460		rs2192158		TRUE	reported	xdcZ5D
BMI_UKB	4	65651730	G	A	-0.013056	0.0020172	9.70063e-11	0.405041	461460		rs1346841		TRUE	reported	xdcZ5D
BMI_UKB	4	67802992	A	G	-0.0145761	0.00240219	1.29999e-09	0.783195	461460		rs923994		TRUE	reported	xdcZ5D
BMI_UKB	4	80609966	T	C	0.0178062	0.00287805	6.1e-10	0.143188	461460		rs72649373		TRUE	reported	xdcZ5D
BMI_UKB	4	89054667	A	G	-0.0229681	0.00310659	1.39991e-13	0.113268	461460		rs4148155		TRUE	reported	xdcZ5D
BMI_UKB	4	96150044	A	T	0.011487	0.0020106	1.09999e-08	0.407327	461460		rs4419475		TRUE	reported	xdcZ5D
BMI_UKB	4	100239319	T	C	0.037357	0.00599385	4.60002e-10	0.972775	461460		rs1229984		TRUE	reported	xdcZ5D
BMI_UKB	4	103188709	C	T	0.0475799	0.00375479	8.49963e-37	0.07492	461460		rs13107325		TRUE	reported	xdcZ5D
BMI_UKB	4	113256737	G	T	0.0110552	0.00201048	3.79997e-08	0.410232	461460		rs59068084		TRUE	reported	xdcZ5D
BMI_UKB	4	130724902	C	T	-0.0142038	0.00206202	5.60015e-12	0.640609	461460		rs11099020		TRUE	reported	xdcZ5D
BMI_UKB	4	137083193	A	C	-0.018862	0.001999	3.90032e-21	0.559032	461460		rs1296328		TRUE	reported	xdcZ5D
BMI_UKB	4	140774684	A	G	-0.0134661	0.00210438	1.6e-10	0.32787	461460		rs17289010		TRUE	reported	xdcZ5D
BMI_UKB	4	147354089	C	T	-0.0155896	0.00251598	5.80003e-10	0.19279	461460		rs113079574		TRUE	reported	xdcZ5D
BMI_UKB	4	162132758	C	T	0.0130897	0.00197607	3.50026e-11	0.507861	461460		rs6843852		TRUE	reported	xdcZ5D
BMI_UKB	4	171635471	C	T	-0.0142245	0.00243798	5.39995e-09	0.208671	461460		rs111598585		TRUE	reported	xdcZ5D
BMI_UKB	4	180167906	G	A	-0.0122469	0.00199427	8.19993e-10	0.557215	461460		rs7683836		TRUE	reported	xdcZ5D
BMI_UKB	5	3513485	A	G	-0.0128512	0.00198514	9.60064e-11	0.543596	461460		rs698147		TRUE	reported	xdcZ5D
BMI_UKB	5	27175962	G	C	-0.0136706	0.00219522	4.70002e-10	0.282614	461460		rs111689389		TRUE	reported	xdcZ5D
BMI_UKB	5	43152216	T	C	0.0141555	0.00213122	3.10027e-11	0.687609	461460		rs13176429		TRUE	reported	xdcZ5D
BMI_UKB	5	50723410	G	A	0.0318817	0.00536236	2.80001e-09	0.035444	461460		rs116374395		TRUE	reported	xdcZ5D
BMI_UKB	5	63020706	T	C	0.0154308	0.00197681	5.90065e-15	0.480077	461460		rs1503526		TRUE	reported	xdcZ5D
BMI_UKB	5	64076515	C	T	-0.014263	0.00199464	8.60003e-13	0.514868	461460		rs9291822		TRUE	reported	xdcZ5D
BMI_UKB	5	75003678	T	C	-0.0280042	0.00202203	1.29987e-43	0.395025	461460		rs2307111		TRUE	reported	xdcZ5D
BMI_UKB	5	77380723	G	T	-0.0115046	0.00201769	1.2e-08	0.587966	461460		rs252761		TRUE	reported	xdcZ5D
BMI_UKB	5	80874229	C	T	-0.0117129	0.00205533	1.2e-08	0.366041	461460		rs28404639		TRUE	reported	xdcZ5D
BMI_UKB	5	86879056	G	T	0.0432552	0.00703547	7.79992e-10	0.020065	461460		rs2962334		TRUE	reported	xdcZ5D
BMI_UKB	5	87682877	C	G	-0.0228163	0.00241251	3.19963e-21	0.214049	461460		rs7442885		TRUE	reported	xdcZ5D
BMI_UKB	5	87988934	T	C	0.0337772	0.00289815	2.19989e-31	0.136947	461460		rs1477290		TRUE	reported	xdcZ5D
BMI_UKB	5	88778861	T	C	0.0116759	0.00200175	5.49997e-09	0.487406	461460		rs1919243		TRUE	reported	xdcZ5D
BMI_UKB	5	104022239	C	G	-0.0123639	0.00199937	6.29999e-10	0.571164	461460		rs396755		TRUE	reported	xdcZ5D
BMI_UKB	5	105870033	T	G	0.0117237	0.00200557	5e-09	0.578511	461460		rs62379271		TRUE	reported	xdcZ5D
BMI_UKB	5	107496102	T	C	-0.0261666	0.00258163	3.80014e-24	0.179536	461460		rs40071		TRUE	reported	xdcZ5D
BMI_UKB	5	112448114	C	G	0.0120126	0.00199631	1.79999e-09	0.433528	461460		rs7704382		TRUE	reported	xdcZ5D
BMI_UKB	5	119389031	C	G	0.013865	0.00201085	5.40008e-12	0.472268	461460		rs347551		TRUE	reported	xdcZ5D
BMI_UKB	5	122657199	G	A	-0.0133419	0.0019956	2.29985e-11	0.473242	461460		rs1582931		TRUE	reported	xdcZ5D
BMI_UKB	5	133861663	C	T	-0.0165734	0.0020038	1.29987e-16	0.419409	461460		rs329118		TRUE	reported	xdcZ5D
BMI_UKB	5	139086651	A	T	-0.014097	0.00204744	5.79963e-12	0.611084	461460		rs2133561		TRUE	reported	xdcZ5D
BMI_UKB	5	140990108	C	T	0.0136775	0.00226991	1.7e-09	0.253365	461460		rs10063055		TRUE	reported	xdcZ5D
BMI_UKB	5	152510937	T	A	-0.0133824	0.00219791	1.09999e-09	0.715119	461460		rs1438945		TRUE	reported	xdcZ5D
BMI_UKB	5	153543466	A	G	-0.0159321	0.0019949	1.39991e-15	0.572344	461460		rs7708584		TRUE	reported	xdcZ5D
BMI_UKB	5	158271680	T	C	0.0135831	0.0022697	2.19999e-09	0.256425	461460		rs17056301		TRUE	reported	xdcZ5D
BMI_UKB	5	167362416	A	T	0.0132315	0.00237757	2.59998e-08	0.224315	461460		rs32421		TRUE	reported	xdcZ5D
BMI_UKB	5	170623391	A	G	0.0182459	0.00213286	1.20005e-17	0.684753	461460		rs11134679		TRUE	reported	xdcZ5D
BMI_UKB	6	9510030	C	T	-0.0115	0.00210115	4.39997e-08	0.338958	461460		rs9463175		TRUE	reported	xdcZ5D
BMI_UKB	6	13180454	T	C	-0.0146269	0.00214834	9.8992e-12	0.303879	461460		rs11757278		TRUE	reported	xdcZ5D
BMI_UKB	6	20488897	A	G	-0.0131292	0.00203539	1.09999e-10	0.609274	461460		rs1322842		TRUE	reported	xdcZ5D
BMI_UKB	6	26145217	C	T	-0.0180331	0.00241845	8.9002e-14	0.220101	461460		rs75499503		TRUE	reported	xdcZ5D
BMI_UKB	6	31671498	T	C	-0.0264826	0.00292978	1.59993e-19	0.130595	461460		rs28366156		TRUE	reported	xdcZ5D
BMI_UKB	6	31944851	T	C	0.0254409	0.00419129	1.29999e-09	0.058989	461460		rs41315816		TRUE	reported	xdcZ5D
BMI_UKB	6	33526827	C	T	0.0148892	0.00220206	1.39991e-11	0.277069	461460		rs9461887		TRUE	reported	xdcZ5D
BMI_UKB	6	34688946	T	C	-0.0285083	0.00210043	5.79963e-42	0.671833	461460		rs9366863		TRUE	reported	xdcZ5D
BMI_UKB	6	40369081	C	T	0.0234784	0.00209371	3.50026e-29	0.334435	461460		rs34045288		TRUE	reported	xdcZ5D
BMI_UKB	6	42516718	C	T	0.0111809	0.00200924	2.59998e-08	0.410635	461460		rs9349235		TRUE	reported	xdcZ5D
BMI_UKB	6	50816887	G	T	0.0387798	0.00262053	1.50003e-49	0.172232	461460		rs72892910		TRUE	reported	xdcZ5D
BMI_UKB	6	51177811	A	G	-0.0148532	0.00203363	2.80027e-13	0.387722	461460		rs1327259		TRUE	reported	xdcZ5D
BMI_UKB	6	51779638	A	G	0.0140966	0.0020712	1e-11	0.349619	461460		rs1266874		TRUE	reported	xdcZ5D
BMI_UKB	6	70357368	T	A	-0.0135915	0.0023901	1.29999e-08	0.21988	461460		rs7761673		TRUE	reported	xdcZ5D
BMI_UKB	6	73742152	G	A	0.0123701	0.00218251	1.40001e-08	0.287599	461460		rs7776021		TRUE	reported	xdcZ5D
BMI_UKB	6	83433228	G	A	0.014782	0.00198818	1e-13	0.476559	461460		rs9294260		TRUE	reported	xdcZ5D
BMI_UKB	6	97753952	C	T	-0.014612	0.00211352	4.70002e-12	0.326809	461460		rs6909685		TRUE	reported	xdcZ5D
BMI_UKB	6	98421721	T	C	0.0182223	0.00201872	1.80011e-19	0.601456	461460		rs6938973		TRUE	reported	xdcZ5D
BMI_UKB	6	100629078	T	C	0.0133488	0.00236315	1.6e-08	0.244995	461460		rs57989773		TRUE	reported	xdcZ5D
BMI_UKB	6	104847441	G	C	0.0131899	0.00228932	8.30004e-09	0.753455	461460		rs156201		TRUE	reported	xdcZ5D
BMI_UKB	6	108888593	C	G	0.0173213	0.00204115	2.09991e-17	0.626099	461460		rs2253310		TRUE	reported	xdcZ5D
BMI_UKB	6	120173501	C	G	-0.0144025	0.00209236	5.79963e-12	0.335132	461460		rs13218383		TRUE	reported	xdcZ5D
BMI_UKB	6	124925032	G	C	0.015339	0.0023121	3.29989e-11	0.242953	461460		rs2875762		TRUE	reported	xdcZ5D
BMI_UKB	6	126064920	T	A	0.0111013	0.00197919	2e-08	0.515653	461460		rs9388446		TRUE	reported	xdcZ5D
BMI_UKB	6	131897278	C	T	0.0148965	0.00265988	2.1e-08	0.165587	461460		rs2781668		TRUE	reported	xdcZ5D
BMI_UKB	6	142703483	A	G	0.0148848	0.00251479	3.2e-09	0.189847	461460		rs6922607		TRUE	reported	xdcZ5D
BMI_UKB	6	143185557	T	A	-0.0120592	0.00197569	1e-09	0.489362	461460		rs765874		TRUE	reported	xdcZ5D
BMI_UKB	6	153380228	A	G	0.0149077	0.00218606	9.09913e-12	0.285408	461460		rs7762794		TRUE	reported	xdcZ5D
BMI_UKB	6	154333183	T	C	0.0181836	0.00267493	1.10002e-11	0.164225	461460		rs9478496		TRUE	reported	xdcZ5D
BMI_UKB	6	163009335	G	A	-0.021045	0.00286788	2.19989e-13	0.137698	461460		rs36007635		TRUE	reported	xdcZ5D
BMI_UKB	7	1270699	G	A	0.0155219	0.00244806	2.30001e-10	0.795086	461460		rs6950388		TRUE	reported	xdcZ5D
BMI_UKB	7	2108036	G	C	-0.0178418	0.00238564	7.50067e-14	0.221467	461460		rs17132130		TRUE	reported	xdcZ5D
BMI_UKB	7	3125220	C	T	0.0186993	0.00287545	7.89951e-11	0.136137	461460		rs4722398		TRUE	reported	xdcZ5D
BMI_UKB	7	14645949	A	G	-0.0361735	0.00635399	1.2e-08	0.97477	461460		rs9638713		TRUE	reported	xdcZ5D
BMI_UKB	7	24354300	A	G	0.0121413	0.00198816	1e-09	0.458941	461460		rs4307239		TRUE	reported	xdcZ5D
BMI_UKB	7	26941065	T	C	0.0157894	0.00280491	1.79999e-08	0.145608	461460		rs213518		TRUE	reported	xdcZ5D
BMI_UKB	7	32369148	A	G	-0.0155223	0.00203492	2.39994e-14	0.611879	461460		rs215634		TRUE	reported	xdcZ5D
BMI_UKB	7	44804225	C	T	-0.0152765	0.00202952	5.19996e-14	0.395648	461460		rs2289379		TRUE	reported	xdcZ5D
BMI_UKB	7	50564204	G	T	-0.0120727	0.00199583	1.5e-09	0.43832	461460		rs3807566		TRUE	reported	xdcZ5D
BMI_UKB	7	71579606	T	C	-0.0154472	0.0024548	3.09999e-10	0.205144	461460		rs73124396		TRUE	reported	xdcZ5D
BMI_UKB	7	75081418	C	T	-0.0229877	0.00200786	2.39994e-30	0.419266	461460		rs58862095		TRUE	reported	xdcZ5D
BMI_UKB	7	76634463	T	C	-0.0213507	0.00255804	7.00003e-17	0.804854	461460		rs17149254		TRUE	reported	xdcZ5D
BMI_UKB	7	78121458	C	T	0.0133747	0.00198884	1.80011e-11	0.502261	461460		rs7805441		TRUE	reported	xdcZ5D
BMI_UKB	7	93096635	T	C	0.0114345	0.00198283	8.10009e-09	0.476084	461460		rs34696181		TRUE	reported	xdcZ5D
BMI_UKB	7	99107727	C	A	-0.0225553	0.00275602	2.70023e-16	0.15244	461460		rs3901286		TRUE	reported	xdcZ5D
BMI_UKB	7	113028634	T	A	-0.018919	0.00201335	5.60015e-21	0.421331	461460		rs2396625		TRUE	reported	xdcZ5D
BMI_UKB	7	113452183	A	C	-0.0159568	0.00198814	1e-15	0.556019	461460		rs6962980		TRUE	reported	xdcZ5D
BMI_UKB	7	114744463	T	C	-0.0196382	0.00352561	2.5e-08	0.086623	461460		rs74750282		TRUE	reported	xdcZ5D
BMI_UKB	7	137435925	T	G	0.0122748	0.00218145	1.79999e-08	0.288566	461460		rs7802342		TRUE	reported	xdcZ5D
BMI_UKB	7	138817193	T	C	-0.0239781	0.00333603	6.59933e-13	0.097701	461460		rs11525873		TRUE	reported	xdcZ5D
BMI_UKB	7	150645534	T	G	-0.0167569	0.00229711	2.99985e-13	0.245301	461460		rs1805123		TRUE	reported	xdcZ5D
BMI_UKB	8	10802001	G	C	-0.0202907	0.00199209	2.29985e-24	0.548052	461460		rs11250094		TRUE	reported	xdcZ5D
BMI_UKB	8	14336834	T	C	0.015764	0.00224155	1.99986e-12	0.268557	461460		rs13248187		TRUE	reported	xdcZ5D
BMI_UKB	8	20632022	G	A	-0.0138738	0.00212547	6.70039e-11	0.319862	461460		rs2616143		TRUE	reported	xdcZ5D
BMI_UKB	8	25662655	T	G	0.0125141	0.00215383	6.19998e-09	0.303342	461460		rs56893062		TRUE	reported	xdcZ5D
BMI_UKB	8	30854033	A	G	-0.0160301	0.00215845	1.10002e-13	0.696115	461460		rs2725371		TRUE	reported	xdcZ5D
BMI_UKB	8	38329650	C	T	0.0128445	0.00201928	2e-10	0.398747	461460		rs36061954		TRUE	reported	xdcZ5D
BMI_UKB	8	62054463	C	A	0.0148693	0.00251693	3.50002e-09	0.1926	461460		rs12681792		TRUE	reported	xdcZ5D
BMI_UKB	8	64756657	A	T	-0.0124447	0.00198274	3.50002e-10	0.473864	461460		rs4737188		TRUE	reported	xdcZ5D
BMI_UKB	8	73440371	G	T	-0.0196429	0.00200438	1.10002e-22	0.574316	461460		rs35957544		TRUE	reported	xdcZ5D
BMI_UKB	8	74714869	A	G	0.022711	0.00404552	2e-08	0.063711	461460		rs145981104		TRUE	reported	xdcZ5D
BMI_UKB	8	76442294	A	G	0.0111622	0.00203237	4e-08	0.617751	461460		rs2941452		TRUE	reported	xdcZ5D
BMI_UKB	8	77227464	A	G	0.0209773	0.0019963	7.89951e-26	0.565728	461460		rs1609010		TRUE	reported	xdcZ5D
BMI_UKB	8	87762607	A	G	0.015796	0.0026874	4.20001e-09	0.163123	461460		rs11778219		TRUE	reported	xdcZ5D
BMI_UKB	8	95585807	T	C	-0.0143261	0.00212723	1.59993e-11	0.31742	461460		rs12541408		TRUE	reported	xdcZ5D
BMI_UKB	8	116671848	A	G	0.0197549	0.00220502	3.29989e-19	0.720243	461460		rs4876611		TRUE	reported	xdcZ5D
BMI_UKB	8	118884379	A	G	0.0218864	0.00321496	9.8992e-12	0.107031	461460		rs72673947		TRUE	reported	xdcZ5D
BMI_UKB	8	142619393	C	T	0.0142239	0.00205862	4.90004e-12	0.383867	461460		rs1078141		TRUE	reported	xdcZ5D
BMI_UKB	8	143373972	A	G	0.0125456	0.00198902	2.80001e-10	0.452592	461460		rs6998660		TRUE	reported	xdcZ5D
BMI_UKB	9	11828585	G	T	-0.0140984	0.00210242	1.99986e-11	0.333719	461460		rs10960293		TRUE	reported	xdcZ5D
BMI_UKB	9	14768160	C	T	-0.0122041	0.00207048	3.79997e-09	0.64022	461460		rs6474856		TRUE	reported	xdcZ5D
BMI_UKB	9	15645713	C	T	-0.0208868	0.0019941	1.10002e-25	0.441399	461460		rs12340969		TRUE	reported	xdcZ5D
BMI_UKB	9	16728532	A	C	0.0214668	0.0025491	3.69999e-17	0.186225	461460		rs1411432		TRUE	reported	xdcZ5D
BMI_UKB	9	23228275	G	A	-0.0136682	0.00210374	8.19974e-11	0.347583	461460		rs1934102		TRUE	reported	xdcZ5D
BMI_UKB	9	27784764	G	A	-0.0119847	0.00198846	1.7e-09	0.471082	461460		rs1928706		TRUE	reported	xdcZ5D
BMI_UKB	9	28414625	C	T	0.0242931	0.00211161	1.29987e-30	0.322437	461460		rs17770336		TRUE	reported	xdcZ5D
BMI_UKB	9	34124860	A	G	-0.0119236	0.00197803	1.7e-09	0.520932	461460		rs2275003		TRUE	reported	xdcZ5D
BMI_UKB	9	37081301	A	G	-0.0129826	0.00204252	2.1e-10	0.373825	461460		rs7034554		TRUE	reported	xdcZ5D
BMI_UKB	9	73796450	C	T	0.0130075	0.00197747	4.79954e-11	0.481546	461460		rs1360201		TRUE	reported	xdcZ5D
BMI_UKB	9	80510077	G	A	0.0110318	0.00199876	3.40001e-08	0.570683	461460		rs13291723		TRUE	reported	xdcZ5D
BMI_UKB	9	81370555	G	A	-0.0121232	0.00199415	1.2e-09	0.559454	461460		rs10780248		TRUE	reported	xdcZ5D
BMI_UKB	9	92207308	A	G	0.0141146	0.00198362	1.10002e-12	0.500139	461460		rs7357754		TRUE	reported	xdcZ5D
BMI_UKB	9	94178371	T	C	-0.0113511	0.00199506	1.29999e-08	0.429018	461460		rs2482356		TRUE	reported	xdcZ5D
BMI_UKB	9	96430747	A	G	0.0179932	0.00226733	2.09991e-15	0.259169	461460		rs2398861		TRUE	reported	xdcZ5D
BMI_UKB	9	103119634	G	A	0.0169514	0.00212349	1.39991e-15	0.31593	461460		rs10989067		TRUE	reported	xdcZ5D
BMI_UKB	9	109072075	T	G	-0.0138177	0.00238338	6.69993e-09	0.77914	461460		rs7024334		TRUE	reported	xdcZ5D
BMI_UKB	9	120377178	T	C	-0.0140202	0.00208641	1.80011e-11	0.33879	461460		rs7038943		TRUE	reported	xdcZ5D
BMI_UKB	9	126093999	C	T	0.0138734	0.00203825	1e-11	0.385049	461460		rs10760277		TRUE	reported	xdcZ5D
BMI_UKB	9	129408290	C	T	0.0145492	0.00208703	3.10027e-12	0.652661	461460		rs7027304		TRUE	reported	xdcZ5D
BMI_UKB	9	131040874	T	C	0.0179769	0.00280183	1.40001e-10	0.145529	461460		rs56203622		TRUE	reported	xdcZ5D
BMI_UKB	9	140363045	T	C	-0.0124638	0.00226426	3.69999e-08	0.286024	461460		rs28670671		TRUE	reported	xdcZ5D
BMI_UKB	10	16750129	G	T	0.0140553	0.00210152	2.29985e-11	0.665897	461460		rs7893571		TRUE	reported	xdcZ5D
BMI_UKB	10	18549889	C	T	0.0177354	0.00311639	1.29999e-08	0.114527	461460		rs73601548		TRUE	reported	xdcZ5D
BMI_UKB	10	21830104	A	G	0.0216425	0.00210126	7.10068e-25	0.331683	461460		rs11012732		TRUE	reported	xdcZ5D
BMI_UKB	10	33971383	G	A	0.0277998	0.00370969	6.70039e-14	0.076936	461460		rs71495038		TRUE	reported	xdcZ5D
BMI_UKB	10	34511990	C	T	-0.0130834	0.00230766	1.40001e-08	0.244096	461460		rs11009685		TRUE	reported	xdcZ5D
BMI_UKB	10	53680099	G	A	0.0130895	0.00198686	4.49987e-11	0.48447	461460		rs12259464		TRUE	reported	xdcZ5D
BMI_UKB	10	61842645	C	T	-0.0123274	0.00211928	5.99998e-09	0.327923	461460		rs7070670		TRUE	reported	xdcZ5D
BMI_UKB	10	65191645	G	T	-0.0142836	0.0019778	5.10035e-13	0.503265	461460		rs7924036		TRUE	reported	xdcZ5D
BMI_UKB	10	76363107	C	T	0.0207688	0.00286631	4.30031e-13	0.139491	461460		rs10824211		TRUE	reported	xdcZ5D
BMI_UKB	10	78760959	C	T	0.0116794	0.00201921	7.29995e-09	0.581338	461460		rs11001963		TRUE	reported	xdcZ5D
BMI_UKB	10	87490850	A	G	0.0270713	0.00391006	4.40048e-12	0.068893	461460		rs17399739		TRUE	reported	xdcZ5D
BMI_UKB	10	88096047	G	C	0.0133212	0.00198909	2.09991e-11	0.497499	461460		rs10887578		TRUE	reported	xdcZ5D
BMI_UKB	10	93061851	T	C	-0.0133327	0.00233034	1.09999e-08	0.23807	461460		rs147568678		TRUE	reported	xdcZ5D
BMI_UKB	10	99778226	A	G	0.0191998	0.00199108	5.30029e-22	0.545612	461460		rs2439823		TRUE	reported	xdcZ5D
BMI_UKB	10	102487140	C	T	-0.0267159	0.00359269	1e-13	0.091551	461460		rs61871615		TRUE	reported	xdcZ5D
BMI_UKB	10	104952499	C	T	0.0236803	0.00369591	1.5e-10	0.077428	461460		rs79780963		TRUE	reported	xdcZ5D
BMI_UKB	10	118650996	C	T	0.0175643	0.00229886	2.19989e-14	0.247013	461460		rs10510025		TRUE	reported	xdcZ5D
BMI_UKB	10	125226178	C	A	0.0139021	0.0020798	2.29985e-11	0.34518	461460		rs705145		TRUE	reported	xdcZ5D
BMI_UKB	10	126640936	T	C	0.0170863	0.0022021	8.60003e-15	0.283614	461460		rs67609008		TRUE	reported	xdcZ5D
BMI_UKB	10	131783328	G	C	0.0448186	0.00788004	1.29999e-08	0.017711	461460		rs117118217		TRUE	reported	xdcZ5D
BMI_UKB	10	132955696	T	C	-0.0142516	0.00245216	6.19998e-09	0.205739	461460		rs7081254		TRUE	reported	xdcZ5D
BMI_UKB	10	133978962	T	C	-0.0149382	0.00200386	8.99912e-14	0.578723	461460		rs2172131		TRUE	reported	xdcZ5D
BMI_UKB	11	838842	C	G	0.013681	0.00199532	7.10068e-12	0.54389	461460		rs6597975		TRUE	reported	xdcZ5D
BMI_UKB	11	2199686	G	A	0.0139533	0.00248571	2e-08	0.200749	461460		rs146569428		TRUE	reported	xdcZ5D
BMI_UKB	11	8639200	T	C	0.0189424	0.00206436	4.49987e-20	0.645204	461460		rs4929923		TRUE	reported	xdcZ5D
BMI_UKB	11	13331808	G	A	0.0160961	0.00201096	1.20005e-15	0.590384	461460		rs55769038		TRUE	reported	xdcZ5D
BMI_UKB	11	17394073	C	G	0.0115628	0.00203985	1.40001e-08	0.623038	461460		rs10832778		TRUE	reported	xdcZ5D
BMI_UKB	11	27679916	C	T	-0.0399185	0.00252719	3.29989e-56	0.188472	461460		rs6265		TRUE	reported	xdcZ5D
BMI_UKB	11	28712741	A	G	-0.0129976	0.00214881	1.5e-09	0.307507	461460		rs558887		TRUE	reported	xdcZ5D
BMI_UKB	11	30430332	G	C	-0.0161952	0.00205793	3.59998e-15	0.360333	461460		rs7942037		TRUE	reported	xdcZ5D
BMI_UKB	11	43692423	A	G	0.0229675	0.00215313	1.50003e-26	0.31149	461460		rs59227842		TRUE	reported	xdcZ5D
BMI_UKB	11	45438374	T	C	0.0117979	0.00202961	6.1e-09	0.612239	461460		rs10742752		TRUE	reported	xdcZ5D
BMI_UKB	11	46159333	T	G	0.0531292	0.00812381	6.20012e-11	0.015432	461460		rs55707359		TRUE	reported	xdcZ5D
BMI_UKB	11	47529947	C	A	0.0256977	0.0020063	1.50003e-37	0.408353	461460		rs7124681		TRUE	reported	xdcZ5D
BMI_UKB	11	64090422	G	A	-0.0182782	0.00267522	8.30042e-12	0.163483	461460		rs7947143		TRUE	reported	xdcZ5D
BMI_UKB	11	65639374	C	T	-0.0203841	0.00205579	3.59998e-23	0.639519	461460		rs2234458		TRUE	reported	xdcZ5D
BMI_UKB	11	69443822	T	C	-0.0146771	0.00199081	1.69981e-13	0.554162	461460		rs594024		TRUE	reported	xdcZ5D
BMI_UKB	11	76474827	G	C	-0.0155862	0.00242199	1.2e-10	0.21751	461460		rs10160769		TRUE	reported	xdcZ5D
BMI_UKB	11	84776849	G	A	-0.0133062	0.00198231	1.9002e-11	0.500388	461460		rs349071		TRUE	reported	xdcZ5D
BMI_UKB	11	89922417	A	G	0.0166235	0.00227115	2.49977e-13	0.254964	461460		rs61903695		TRUE	reported	xdcZ5D
BMI_UKB	11	115037061	A	C	0.015712	0.00199179	3.10027e-15	0.486574	461460		rs11607476		TRUE	reported	xdcZ5D
BMI_UKB	11	116911012	C	T	0.0248393	0.00428551	6.80002e-09	0.056505	461460		rs12273545		TRUE	reported	xdcZ5D
BMI_UKB	11	118941596	G	A	0.014725	0.0020221	3.29989e-13	0.396117	461460		rs7925100		TRUE	reported	xdcZ5D
BMI_UKB	11	121922587	G	A	-0.0144616	0.00202121	8.4004e-13	0.40047	461460		rs11218510		TRUE	reported	xdcZ5D
BMI_UKB	11	130795698	T	G	0.0157606	0.00198748	2.19989e-15	0.509784	461460		rs7944782		TRUE	reported	xdcZ5D
BMI_UKB	11	131451862	T	C	0.0129468	0.00199819	9.20026e-11	0.566085	461460		rs2512892		TRUE	reported	xdcZ5D
BMI_UKB	11	131934926	G	C	-0.0133343	0.0021408	4.70002e-10	0.309144	461460		rs1793636		TRUE	reported	xdcZ5D
BMI_UKB	11	133767622	G	T	0.0157218	0.00250202	3.29997e-10	0.803977	461460		rs329651		TRUE	reported	xdcZ5D
BMI_UKB	11	134601012	T	G	0.0192705	0.0026658	4.90004e-13	0.164556	461460		rs12364470		TRUE	reported	xdcZ5D
BMI_UKB	12	991306	G	A	0.02483	0.00242628	1.39991e-24	0.209709	461460		rs55726687		TRUE	reported	xdcZ5D
BMI_UKB	12	2161561	C	T	0.0111273	0.00200698	2.99999e-08	0.43151	461460		rs723672		TRUE	reported	xdcZ5D
BMI_UKB	12	16933340	A	G	0.0128422	0.00233829	4e-08	0.233706	461460		rs11057072		TRUE	reported	xdcZ5D
BMI_UKB	12	19288508	A	C	0.0184851	0.00287086	1.2e-10	0.860012	461460		rs10505836		TRUE	reported	xdcZ5D
BMI_UKB	12	23753927	T	G	0.0248489	0.00415281	2.19999e-09	0.062119	461460		rs11608710		TRUE	reported	xdcZ5D
BMI_UKB	12	24058135	C	T	0.0213233	0.0030884	5.00035e-12	0.116102	461460		rs10771041		TRUE	reported	xdcZ5D
BMI_UKB	12	41887940	C	T	0.014075	0.00197951	1.20005e-12	0.488431	461460		rs1458156		TRUE	reported	xdcZ5D
BMI_UKB	12	49399132	G	C	0.0322695	0.00535892	1.7e-09	0.035271	461460		rs1126930		TRUE	reported	xdcZ5D
BMI_UKB	12	50263148	G	A	0.0297904	0.00203363	1.39991e-48	0.384458	461460		rs7132908		TRUE	reported	xdcZ5D
BMI_UKB	12	56494991	G	A	-0.0163086	0.00201869	6.4998e-16	0.40272	461460		rs2271189		TRUE	reported	xdcZ5D
BMI_UKB	12	60964108	A	G	0.0151361	0.00241251	3.50002e-10	0.213905	461460		rs7975187		TRUE	reported	xdcZ5D
BMI_UKB	12	68107914	G	A	-0.0112754	0.00205437	4.09996e-08	0.621712	461460		rs7306534		TRUE	reported	xdcZ5D
BMI_UKB	12	69681101	T	A	-0.0144763	0.00221303	6.09958e-11	0.724452	461460		rs317656		TRUE	reported	xdcZ5D
BMI_UKB	12	82424100	G	A	-0.0130768	0.00233641	2.19999e-08	0.237797	461460		rs11115160		TRUE	reported	xdcZ5D
BMI_UKB	12	89771903	T	C	0.0146374	0.00198552	1.69981e-13	0.45505	461460		rs704061		TRUE	reported	xdcZ5D
BMI_UKB	12	97573258	A	C	0.0144775	0.00251798	8.9e-09	0.192721	461460		rs1990662		TRUE	reported	xdcZ5D
BMI_UKB	12	103658096	A	G	-0.0183924	0.00211197	3.10027e-18	0.325892	461460		rs4764949		TRUE	reported	xdcZ5D
BMI_UKB	12	107713511	G	C	0.011981	0.00199336	1.79999e-09	0.503131	461460		rs961498		TRUE	reported	xdcZ5D
BMI_UKB	12	108294381	A	G	-0.0177165	0.00232002	2.19989e-14	0.243934	461460		rs73193736		TRUE	reported	xdcZ5D
BMI_UKB	12	121671133	T	A	0.0164869	0.00278318	3.09999e-09	0.148174	461460		rs11610621		TRUE	reported	xdcZ5D
BMI_UKB	12	123024476	G	T	-0.0350799	0.00358357	1.29987e-22	0.087243	461460		rs147730268		TRUE	reported	xdcZ5D
BMI_UKB	12	123492112	C	T	0.0120838	0.00202716	2.5e-09	0.411157	461460		rs3897102		TRUE	reported	xdcZ5D
BMI_UKB	12	133414054	T	C	-0.012198	0.00214136	1.2e-08	0.691874	461460		rs6560906		TRUE	reported	xdcZ5D
BMI_UKB	13	28036062	G	A	-0.0170434	0.00220377	1e-14	0.285117	461460		rs1967772		TRUE	reported	xdcZ5D
BMI_UKB	13	31037903	G	C	-0.0146183	0.00223793	6.4998e-11	0.266743	461460		rs2249825		TRUE	reported	xdcZ5D
BMI_UKB	13	33381721	C	T	-0.0161325	0.00199646	6.4003e-16	0.449124	461460		rs56399737		TRUE	reported	xdcZ5D
BMI_UKB	13	40762556	C	G	0.0153235	0.00266515	8.9e-09	0.165544	461460		rs17446299		TRUE	reported	xdcZ5D
BMI_UKB	13	54104968	C	T	0.0296118	0.00298011	2.90001e-23	0.128644	461460		rs4477562		TRUE	reported	xdcZ5D
BMI_UKB	13	58257667	T	A	-0.015934	0.00230346	4.60045e-12	0.753587	461460		rs6561937		TRUE	reported	xdcZ5D
BMI_UKB	13	59266053	C	T	-0.0178082	0.00200801	7.39946e-19	0.416804	461460		rs4055791		TRUE	reported	xdcZ5D
BMI_UKB	13	67472713	C	A	-0.0135388	0.0021094	1.40001e-10	0.329363	461460		rs9571687		TRUE	reported	xdcZ5D
BMI_UKB	13	79580919	G	A	0.0179033	0.00205854	3.40017e-18	0.593681	461460		rs1441264		TRUE	reported	xdcZ5D
BMI_UKB	13	86511730	G	A	0.0159188	0.00217378	2.39994e-13	0.296861	461460		rs56858768		TRUE	reported	xdcZ5D
BMI_UKB	13	97019090	G	A	0.0145559	0.00200245	3.59998e-13	0.449354	461460		rs7996639		TRUE	reported	xdcZ5D
BMI_UKB	13	99236471	G	A	-0.0143702	0.00220081	6.59933e-11	0.285276	461460		rs7331420		TRUE	reported	xdcZ5D
BMI_UKB	13	107854612	C	T	0.0120038	0.0020182	2.69998e-09	0.538079	461460		rs9888533		TRUE	reported	xdcZ5D
BMI_UKB	13	111970212	C	T	-0.0141095	0.00199325	1.50003e-12	0.553392	461460		rs9522180		TRUE	reported	xdcZ5D
BMI_UKB	13	112217108	A	G	0.0151051	0.00199052	3.19963e-14	0.447709	461460		rs9515446		TRUE	reported	xdcZ5D
BMI_UKB	14	25930988	C	A	0.0213422	0.00211709	6.70039e-24	0.677097	461460		rs8015400		TRUE	reported	xdcZ5D
BMI_UKB	14	29675957	G	C	0.0169247	0.00251308	1.59993e-11	0.807458	461460		rs11161044		TRUE	reported	xdcZ5D
BMI_UKB	14	30101641	C	A	-0.0122197	0.00202687	1.7e-09	0.593587	461460		rs1191600		TRUE	reported	xdcZ5D
BMI_UKB	14	41350367	G	T	0.022201	0.00360585	7.39997e-10	0.082266	461460		rs1451963		TRUE	reported	xdcZ5D
BMI_UKB	14	47298505	G	A	-0.0164677	0.00198067	9.20026e-17	0.508121	461460		rs35697587		TRUE	reported	xdcZ5D
BMI_UKB	14	62361021	A	C	0.0170155	0.00223046	2.39994e-14	0.271741	461460		rs217672		TRUE	reported	xdcZ5D
BMI_UKB	14	69789755	T	G	0.0141019	0.00235267	2e-09	0.237151	461460		rs3902951		TRUE	reported	xdcZ5D
BMI_UKB	14	73309738	T	A	0.0117038	0.00198192	3.50002e-09	0.510958	461460		rs1860750		TRUE	reported	xdcZ5D
BMI_UKB	14	79937216	T	A	0.0251068	0.00239517	1e-25	0.220464	461460		rs8020365		TRUE	reported	xdcZ5D
BMI_UKB	14	88326386	G	A	0.0150461	0.00236876	2.1e-10	0.22586	461460		rs113624107		TRUE	reported	xdcZ5D
BMI_UKB	14	91458523	T	A	0.0149126	0.00216922	6.20012e-12	0.703747	461460		rs1286058		TRUE	reported	xdcZ5D
BMI_UKB	14	94023972	G	A	0.0207333	0.00206189	8.69961e-24	0.636038	461460		rs6575340		TRUE	reported	xdcZ5D
BMI_UKB	14	101146413	A	G	0.0220748	0.00358929	7.69999e-10	0.08265	461460		rs12881629		TRUE	reported	xdcZ5D
BMI_UKB	14	101531854	A	G	-0.0161925	0.00206924	5.10035e-15	0.49195	461460		rs61992671		TRUE	reported	xdcZ5D
BMI_UKB	14	103246470	A	G	-0.0186417	0.00209828	6.4003e-19	0.666815	461460		rs3803286		TRUE	reported	xdcZ5D
BMI_UKB	14	104178186	A	G	0.0149201	0.0021124	1.59993e-12	0.328484	461460		rs3212038		TRUE	reported	xdcZ5D
BMI_UKB	15	31843528	T	C	0.0119673	0.00199506	2e-09	0.467122	461460		rs4284600		TRUE	reported	xdcZ5D
BMI_UKB	15	35837297	A	T	0.0156329	0.00276778	1.6e-08	0.848207	461460		rs8024137		TRUE	reported	xdcZ5D
BMI_UKB	15	41339697	T	C	-0.0389151	0.00678155	9.59997e-09	0.022158	461460		rs34153025		TRUE	reported	xdcZ5D
BMI_UKB	15	46585722	C	T	0.0139285	0.0020011	3.40017e-12	0.433693	461460		rs12440603		TRUE	reported	xdcZ5D
BMI_UKB	15	52353498	C	G	0.0230305	0.00352223	6.20012e-11	0.089346	461460		rs35697691		TRUE	reported	xdcZ5D
BMI_UKB	15	53484623	A	G	-0.0243736	0.00418404	5.69994e-09	0.060091	461460		rs16965658		TRUE	reported	xdcZ5D
BMI_UKB	15	55424234	A	G	-0.0370828	0.00666929	2.69998e-08	0.022673	461460		rs78012460		TRUE	reported	xdcZ5D
BMI_UKB	15	59470366	C	T	0.0149659	0.0023609	2.30001e-10	0.229995	461460		rs2899644		TRUE	reported	xdcZ5D
BMI_UKB	15	68072458	T	C	-0.0297067	0.00236042	2.49977e-36	0.226602	461460		rs3784710		TRUE	reported	xdcZ5D
BMI_UKB	15	73765586	C	T	-0.0246882	0.00370967	2.80027e-11	0.082292	461460		rs140159717		TRUE	reported	xdcZ5D
BMI_UKB	15	74278126	C	T	0.0217069	0.00318335	9.20026e-12	0.109739	461460		rs35364449		TRUE	reported	xdcZ5D
BMI_UKB	15	78029797	G	A	-0.0167007	0.00224215	9.3994e-14	0.265091	461460		rs62007782		TRUE	reported	xdcZ5D
BMI_UKB	15	79403585	C	T	-0.0157151	0.00201912	7.10068e-15	0.412066	461460		rs2870111		TRUE	reported	xdcZ5D
BMI_UKB	15	81028965	C	G	0.0118671	0.00198456	2.19999e-09	0.465442	461460		rs11634851		TRUE	reported	xdcZ5D
BMI_UKB	15	89960286	T	A	-0.0165665	0.0028635	7.19996e-09	0.14168	461460		rs62020775		TRUE	reported	xdcZ5D
BMI_UKB	15	92570921	C	G	-0.0160905	0.00241172	2.49977e-11	0.21723	461460		rs12101393		TRUE	reported	xdcZ5D
BMI_UKB	15	95271872	T	G	-0.0146558	0.00207578	1.69981e-12	0.645928	461460		rs8025516		TRUE	reported	xdcZ5D
BMI_UKB	15	99240947	G	A	-0.012674	0.00228082	2.69998e-08	0.251739	461460		rs11630647		TRUE	reported	xdcZ5D
BMI_UKB	16	407723	G	A	-0.0149781	0.00207999	6.00067e-13	0.354291	461460		rs7201895		TRUE	reported	xdcZ5D
BMI_UKB	16	4015729	C	T	0.0241136	0.00203595	2.29985e-32	0.613237	461460		rs879620		TRUE	reported	xdcZ5D
BMI_UKB	16	4872970	G	C	0.0132903	0.00223627	2.80001e-09	0.267182	461460		rs2075466		TRUE	reported	xdcZ5D
BMI_UKB	16	6716017	C	G	-0.0122407	0.00224111	4.70002e-08	0.270097	461460		rs9931586		TRUE	reported	xdcZ5D
BMI_UKB	16	19941968	T	C	-0.023818	0.00254677	8.60003e-21	0.184576	461460		rs9926784		TRUE	reported	xdcZ5D
BMI_UKB	16	24540806	T	G	-0.0126972	0.00197715	1.29999e-10	0.516212	461460		rs2342892		TRUE	reported	xdcZ5D
BMI_UKB	16	24862414	A	G	-0.0130427	0.00223442	5.30005e-09	0.274044	461460		rs35154326		TRUE	reported	xdcZ5D
BMI_UKB	16	28883241	A	G	0.0268646	0.00201997	2.29985e-40	0.399659	461460		rs7498665		TRUE	reported	xdcZ5D
BMI_UKB	16	29994922	C	T	0.0240107	0.00198424	1e-33	0.482402	461460		rs3814883		TRUE	reported	xdcZ5D
BMI_UKB	16	49035172	C	G	-0.0142847	0.00256649	2.59998e-08	0.812878	461460		rs2193101		TRUE	reported	xdcZ5D
BMI_UKB	16	53798622	G	T	0.0676323	0.00199438	1e-200	0.439435	461460		rs8047587		TRUE	reported	xdcZ5D
BMI_UKB	16	53813498	C	T	-0.0251967	0.00436586	7.90005e-09	0.05448	461460		rs8063946		TRUE	reported	xdcZ5D
BMI_UKB	16	69187318	C	G	0.0140268	0.00219322	1.6e-10	0.715152	461460		rs5011579		TRUE	reported	xdcZ5D
BMI_UKB	16	69651866	C	T	-0.0231703	0.00201345	1.20005e-30	0.40965	461460		rs862320		TRUE	reported	xdcZ5D
BMI_UKB	16	70309237	G	A	-0.0227338	0.00311586	2.99985e-13	0.114956	461460		rs12149660		TRUE	reported	xdcZ5D
BMI_UKB	16	72312727	A	G	0.0203327	0.0036983	3.79997e-08	0.077984	461460		rs12921986		TRUE	reported	xdcZ5D
BMI_UKB	16	76895693	A	G	0.0130337	0.00198783	5.50047e-11	0.490967	461460		rs9673839		TRUE	reported	xdcZ5D
BMI_UKB	16	81730582	T	C	0.0114184	0.00205925	2.90001e-08	0.373536	461460		rs11642090		TRUE	reported	xdcZ5D
BMI_UKB	16	82872628	C	G	0.0135122	0.00211797	1.79999e-10	0.32162	461460		rs7206608		TRUE	reported	xdcZ5D
BMI_UKB	17	1824305	C	A	-0.0254509	0.00275603	2.60016e-20	0.153693	461460		rs4790292		TRUE	reported	xdcZ5D
BMI_UKB	17	2168104	G	T	-0.0132582	0.0022019	1.7e-09	0.281086	461460		rs118136827		TRUE	reported	xdcZ5D
BMI_UKB	17	4801163	C	A	0.014988	0.00215169	3.29989e-12	0.310467	461460		rs7774		TRUE	reported	xdcZ5D
BMI_UKB	17	5286277	A	T	0.021339	0.00388113	3.79997e-08	0.070324	461460		rs80135274		TRUE	reported	xdcZ5D
BMI_UKB	17	15888448	T	C	0.0140681	0.00199601	1.80011e-12	0.561561	461460		rs8076669		TRUE	reported	xdcZ5D
BMI_UKB	17	21264396	C	T	-0.0180321	0.00199407	1.50003e-19	0.454791	461460		rs1320251		TRUE	reported	xdcZ5D
BMI_UKB	17	31464270	G	A	-0.0154285	0.00237054	7.59976e-11	0.224774	461460		rs11656076		TRUE	reported	xdcZ5D
BMI_UKB	17	34950239	C	T	-0.017187	0.00201383	1.39991e-17	0.408167	461460		rs12937411		TRUE	reported	xdcZ5D
BMI_UKB	17	46288649	A	T	0.0224575	0.00291784	1.39991e-14	0.132847	461460		rs56161855		TRUE	reported	xdcZ5D
BMI_UKB	17	47090785	C	T	-0.020093	0.00211163	1.80011e-21	0.328531	461460		rs11079849		TRUE	reported	xdcZ5D
BMI_UKB	17	52938468	A	C	0.0156492	0.00282374	2.99999e-08	0.144541	461460		rs62072006		TRUE	reported	xdcZ5D
BMI_UKB	17	65832016	T	C	0.0189524	0.00249216	2.90001e-14	0.197305	461460		rs7218014		TRUE	reported	xdcZ5D
BMI_UKB	17	78757626	A	G	-0.0211611	0.00212961	2.90001e-23	0.317711	461460		rs11150745		TRUE	reported	xdcZ5D
BMI_UKB	17	79084367	G	A	-0.0144864	0.00199701	4.00037e-13	0.536784	461460		rs3935190		TRUE	reported	xdcZ5D
BMI_UKB	17	80191995	C	G	0.158445	0.0286171	3.09999e-08	0.001338	461460		rs9674487		TRUE	reported	xdcZ5D
BMI_UKB	18	1839911	G	T	0.02099	0.00282688	1.10002e-13	0.144883	461460		rs60764613		TRUE	reported	xdcZ5D
BMI_UKB	18	7548501	T	C	-0.0159359	0.00252176	2.59998e-10	0.192054	461460		rs512121		TRUE	reported	xdcZ5D
BMI_UKB	18	21090023	A	G	-0.020404	0.00198255	7.70016e-25	0.49478	461460		rs1788808		TRUE	reported	xdcZ5D
BMI_UKB	18	31251221	G	T	0.0123404	0.00200821	8e-10	0.58263	461460		rs7232171		TRUE	reported	xdcZ5D
BMI_UKB	18	39644247	G	T	0.0134907	0.00203562	3.40017e-11	0.393053	461460		rs559231		TRUE	reported	xdcZ5D
BMI_UKB	18	40744790	C	A	-0.0140112	0.00205213	8.60003e-12	0.373192	461460		rs1834144		TRUE	reported	xdcZ5D
BMI_UKB	18	53397199	T	C	0.0179315	0.00254968	1.99986e-12	0.812541	461460		rs784257		TRUE	reported	xdcZ5D
BMI_UKB	18	56882326	T	G	0.0144231	0.00235777	9.49992e-10	0.767369	461460		rs9951619		TRUE	reported	xdcZ5D
BMI_UKB	18	57829135	T	C	0.0541723	0.00234213	2.30144e-118	0.232714	461460		rs6567160		TRUE	reported	xdcZ5D
BMI_UKB	18	58048295	T	C	-0.0412553	0.00358326	1.10002e-30	0.08383	461460		rs57636386		TRUE	reported	xdcZ5D
BMI_UKB	18	69224478	T	A	0.012988	0.00207588	3.89996e-10	0.36868	461460		rs8089514		TRUE	reported	xdcZ5D
BMI_UKB	19	1866115	C	T	0.0152466	0.00199717	2.29985e-14	0.543175	461460		rs12974458		TRUE	reported	xdcZ5D
BMI_UKB	19	2244849	G	A	0.025766	0.00403737	1.7e-10	0.065685	461460		rs45486197		TRUE	reported	xdcZ5D
BMI_UKB	19	4050424	G	A	-0.0232257	0.00254712	7.59976e-20	0.190123	461460		rs72976986		TRUE	reported	xdcZ5D
BMI_UKB	19	18207397	A	C	0.0175719	0.00210043	6.00067e-17	0.343587	461460		rs55714539		TRUE	reported	xdcZ5D
BMI_UKB	19	18454825	A	G	-0.017199	0.00224218	1.69981e-14	0.26777	461460		rs17724992		TRUE	reported	xdcZ5D
BMI_UKB	19	18812785	A	G	-0.020696	0.00202712	1.80011e-24	0.400329	461460		rs8112818		TRUE	reported	xdcZ5D
BMI_UKB	19	19352155	T	C	-0.016327	0.00275021	2.90001e-09	0.154894	461460		rs56352336		TRUE	reported	xdcZ5D
BMI_UKB	19	30272202	G	A	0.0195822	0.00212071	2.60016e-20	0.329692	461460		rs12462975		TRUE	reported	xdcZ5D
BMI_UKB	19	31017686	C	A	-0.022318	0.00275052	4.90004e-16	0.153534	461460		rs73026725		TRUE	reported	xdcZ5D
BMI_UKB	19	33935675	T	C	0.0135545	0.00218692	5.69994e-10	0.289347	461460		rs10402950		TRUE	reported	xdcZ5D
BMI_UKB	19	45411941	T	C	-0.0266723	0.00274373	2.39994e-22	0.154166	461460		rs429358		TRUE	reported	xdcZ5D
BMI_UKB	19	46182304	T	A	-0.0340136	0.00249869	3.40017e-42	0.194358	461460		rs10423928		TRUE	reported	xdcZ5D
BMI_UKB	19	47562509	T	C	0.021869	0.00203628	6.59933e-27	0.596062	461460		rs7259070		TRUE	reported	xdcZ5D
BMI_UKB	19	49649051	T	G	-0.0117714	0.00201523	5.19996e-09	0.587594	461460		rs3764625		TRUE	reported	xdcZ5D
BMI_UKB	20	2126089	A	G	-0.0112551	0.00199313	1.6e-08	0.479914	461460		rs2153740		TRUE	reported	xdcZ5D
BMI_UKB	20	6612832	A	G	0.020001	0.00205634	2.29985e-22	0.627378	461460		rs1884897		TRUE	reported	xdcZ5D
BMI_UKB	20	17091233	A	G	-0.0131207	0.00231309	1.40001e-08	0.758575	461460		rs852042		TRUE	reported	xdcZ5D
BMI_UKB	20	25190777	C	T	0.0146111	0.00210138	3.59998e-12	0.333444	461460		rs4456769		TRUE	reported	xdcZ5D
BMI_UKB	20	41982698	G	A	-0.0184105	0.00291255	2.59998e-10	0.134817	461460		rs909892		TRUE	reported	xdcZ5D
BMI_UKB	20	44895075	G	A	0.0122284	0.00201106	1.2e-09	0.415111	461460		rs2425816		TRUE	reported	xdcZ5D
BMI_UKB	20	47501038	C	A	-0.0185029	0.00270404	7.8001e-12	0.165329	461460		rs34481751		TRUE	reported	xdcZ5D
BMI_UKB	20	51195932	C	T	-0.0266936	0.00252257	3.59998e-26	0.192297	461460		rs73142879		TRUE	reported	xdcZ5D
BMI_UKB	20	53479658	A	G	-0.0147346	0.00234997	3.59998e-10	0.765741	461460		rs6023655		TRUE	reported	xdcZ5D
BMI_UKB	20	62157198	G	A	-0.0335418	0.00582677	8.60003e-09	0.035832	461460		rs11699828		TRUE	reported	xdcZ5D
BMI_UKB	21	40288577	G	A	-0.015375	0.00219317	2.39994e-12	0.313023	461460		rs8132491		TRUE	reported	xdcZ5D
BMI_UKB	21	42626706	T	C	0.0126647	0.00207859	1.09999e-09	0.651408	461460		rs2837996		TRUE	reported	xdcZ5D
BMI_UKB	21	46581798	T	C	0.0186353	0.00199484	9.49948e-21	0.537697	461460		rs394608		TRUE	reported	xdcZ5D
BMI_UKB	22	18226997	C	G	0.015973	0.00260181	8.30004e-10	0.177266	461460		rs406388		TRUE	reported	xdcZ5D
BMI_UKB	22	40690385	A	G	-0.0177457	0.00208527	1.69981e-17	0.345317	461460		rs4820410		TRUE	reported	xdcZ5D
BMI_UKB	22	41804716	G	A	-0.0153737	0.00220025	2.80027e-12	0.290349	461460		rs28489620		TRUE	reported	xdcZ5D
WC_UKB	1	1601052	G	A	-0.0148957	0.00206456	5.40008e-13	0.259865	462166		rs72634826		TRUE	reported	OrO3Oq
WC_UKB	1	2725475	C	A	0.0107362	0.00180248	2.59998e-09	0.531758	462166		rs7537581		TRUE	reported	OrO3Oq
WC_UKB	1	6657424	C	A	0.010421	0.00187021	2.5e-08	0.355681	462166		rs3866805		TRUE	reported	OrO3Oq
WC_UKB	1	7725414	C	T	0.0113966	0.00183009	4.70002e-10	0.393063	462166		rs4908672		TRUE	reported	OrO3Oq
WC_UKB	1	16840786	G	T	-0.0138228	0.00243775	1.40001e-08	0.267387	462166		rs156902		TRUE	reported	OrO3Oq
WC_UKB	1	23712528	T	A	-0.018179	0.00256951	1.50003e-12	0.860102	462166		rs649458		TRUE	reported	OrO3Oq
WC_UKB	1	32191798	G	C	0.0100787	0.0018363	4.09996e-08	0.615598	462166		rs945211		TRUE	reported	OrO3Oq
WC_UKB	1	33784146	T	C	0.0124771	0.00190203	5.40008e-11	0.673097	462166		rs6682438		TRUE	reported	OrO3Oq
WC_UKB	1	40035928	G	T	0.0176726	0.00224849	3.80014e-15	0.196525	462166		rs3768321		TRUE	reported	OrO3Oq
WC_UKB	1	47678458	A	G	-0.0125214	0.0018097	4.49987e-12	0.58271	462166		rs6669341		TRUE	reported	OrO3Oq
WC_UKB	1	49879122	A	G	-0.0170126	0.00192843	1.10002e-18	0.688535	462166		rs6693294		TRUE	reported	OrO3Oq
WC_UKB	1	54743111	C	T	0.0118054	0.0020079	4.09996e-09	0.686869	462166		rs587271		TRUE	reported	OrO3Oq
WC_UKB	1	62579891	G	T	-0.0265936	0.00313243	2.09991e-17	0.094226	462166		rs12140153		TRUE	reported	OrO3Oq
WC_UKB	1	66434743	G	A	0.0126703	0.00179634	1.69981e-12	0.528392	462166		rs7519259		TRUE	reported	OrO3Oq
WC_UKB	1	72765116	G	A	0.0169206	0.00182184	1.59993e-20	0.603683	462166		rs2568958		TRUE	reported	OrO3Oq
WC_UKB	1	75001480	C	T	0.0107371	0.00182845	4.30002e-09	0.391147	462166		rs3845344		TRUE	reported	OrO3Oq
WC_UKB	1	78450517	C	A	0.0305491	0.00276165	1.9002e-28	0.121789	462166		rs34517439		TRUE	reported	OrO3Oq
WC_UKB	1	80784642	T	C	0.0122283	0.00192412	2.1e-10	0.31619	462166		rs11162968		TRUE	reported	OrO3Oq
WC_UKB	1	96274928	G	A	0.0107576	0.00189335	1.29999e-08	0.343044	462166		rs11165493		TRUE	reported	OrO3Oq
WC_UKB	1	96886604	G	A	0.0155276	0.00181174	1e-17	0.584119	462166		rs588660		TRUE	reported	OrO3Oq
WC_UKB	1	98315893	A	G	0.0162106	0.00214325	3.90032e-14	0.224447	462166		rs12072739		TRUE	reported	OrO3Oq
WC_UKB	1	110082551	T	G	0.0522591	0.00563338	1.69981e-20	0.025998	462166		rs41279738		TRUE	reported	OrO3Oq
WC_UKB	1	112324111	A	T	0.0120777	0.00183977	5.19996e-11	0.381482	462166		rs2618039		TRUE	reported	OrO3Oq
WC_UKB	1	156049877	C	T	0.0219762	0.00264443	9.49948e-17	0.135713	462166		rs61813324		TRUE	reported	OrO3Oq
WC_UKB	1	174572982	C	A	0.0168196	0.00284261	3.29997e-09	0.110699	462166		rs35216639		TRUE	reported	OrO3Oq
WC_UKB	1	174973726	A	G	-0.0333436	0.0052036	1.5e-10	0.030399	462166		rs75035127		TRUE	reported	OrO3Oq
WC_UKB	1	177889025	A	C	0.0378223	0.00221181	1.50003e-65	0.204929	462166		rs539515		TRUE	reported	OrO3Oq
WC_UKB	1	190294726	T	C	-0.0131383	0.00179812	2.70023e-13	0.563195	462166		rs815163		TRUE	reported	OrO3Oq
WC_UKB	1	201800511	T	G	0.0157074	0.00188488	7.89951e-17	0.34017	462166		rs2678204		TRUE	reported	OrO3Oq
WC_UKB	1	209218583	C	G	-0.010659	0.00183376	6.1e-09	0.615028	462166		rs4562625		TRUE	reported	OrO3Oq
WC_UKB	1	209516897	C	G	0.0159508	0.00263908	1.5e-09	0.131724	462166		rs1507331		TRUE	reported	OrO3Oq
WC_UKB	1	218634787	A	G	0.0121715	0.00200003	1.2e-09	0.277245	462166		rs1108548		TRUE	reported	OrO3Oq
WC_UKB	1	243533273	A	G	-0.014934	0.00255686	5.19996e-09	0.143895	462166		rs12042959		TRUE	reported	OrO3Oq
WC_UKB	2	430975	C	T	-0.0700663	0.00488088	9.8992e-47	0.035495	462166		rs77165542		TRUE	reported	OrO3Oq
WC_UKB	2	629244	A	C	0.0431919	0.00236577	1.80011e-74	0.828064	462166		rs12463617		TRUE	reported	OrO3Oq
WC_UKB	2	6143991	T	A	-0.00985187	0.0018049	4.79999e-08	0.434383	462166		rs1405261		TRUE	reported	OrO3Oq
WC_UKB	2	25195577	T	C	0.0234759	0.0021623	1.80011e-27	0.217783	462166		rs76286777		TRUE	reported	OrO3Oq
WC_UKB	2	26938216	G	T	-0.0118366	0.0020818	1.29999e-08	0.757325	462166		rs1731246		TRUE	reported	OrO3Oq
WC_UKB	2	35436262	C	T	-0.0099592	0.00180578	3.50002e-08	0.565114	462166		rs9308964		TRUE	reported	OrO3Oq
WC_UKB	2	36558986	T	C	0.0105694	0.00185324	1.2e-08	0.367606	462166		rs11898037		TRUE	reported	OrO3Oq
WC_UKB	2	36789166	A	G	0.0141058	0.0018498	2.39994e-14	0.36952	462166		rs13410783		TRUE	reported	OrO3Oq
WC_UKB	2	40282202	G	A	-0.0114529	0.0020405	2e-08	0.280698	462166		rs10185199		TRUE	reported	OrO3Oq
WC_UKB	2	48953979	T	A	-0.0129811	0.00231667	2.1e-08	0.189431	462166		rs72618637		TRUE	reported	OrO3Oq
WC_UKB	2	50751414	C	A	-0.0133504	0.00185957	7.00003e-13	0.365011	462166		rs13420048		TRUE	reported	OrO3Oq
WC_UKB	2	58933591	C	T	-0.016009	0.00180199	6.4003e-19	0.555467	462166		rs1861410		TRUE	reported	OrO3Oq
WC_UKB	2	59330227	A	G	-0.0159241	0.00182885	3.10027e-18	0.603358	462166		rs6739755		TRUE	reported	OrO3Oq
WC_UKB	2	67838719	T	C	-0.0166517	0.00199772	7.70016e-17	0.275371	462166		rs2861692		TRUE	reported	OrO3Oq
WC_UKB	2	69678079	T	C	-0.0101534	0.00177268	1e-08	0.407729	462166		rs35681682		TRUE	reported	OrO3Oq
WC_UKB	2	86855977	A	G	-0.0114749	0.00198055	6.90001e-09	0.714436	462166		rs308911		TRUE	reported	OrO3Oq
WC_UKB	2	100894802	C	G	-0.0173961	0.00193525	2.49977e-19	0.684805	462166		rs4851283		TRUE	reported	OrO3Oq
WC_UKB	2	104454345	A	T	-0.00990642	0.00179682	3.50002e-08	0.54446	462166		rs1441098		TRUE	reported	OrO3Oq
WC_UKB	2	105977776	G	A	0.016586	0.00271786	1e-09	0.124704	462166		rs3087523		TRUE	reported	OrO3Oq
WC_UKB	2	133523605	G	A	0.0125512	0.00206781	1.29999e-09	0.25275	462166		rs13033310		TRUE	reported	OrO3Oq
WC_UKB	2	146015229	G	A	-0.0301131	0.00537007	2.1e-08	0.028947	462166		rs114964326		TRUE	reported	OrO3Oq
WC_UKB	2	147903382	A	G	-0.0124509	0.00180931	5.90065e-12	0.576576	462166		rs429343		TRUE	reported	OrO3Oq
WC_UKB	2	161105876	G	A	0.0119451	0.00191493	4.39997e-10	0.677313	462166		rs10803762		TRUE	reported	OrO3Oq
WC_UKB	2	166278584	A	G	-0.0114262	0.0020945	4.90004e-08	0.239776	462166		rs62174721		TRUE	reported	OrO3Oq
WC_UKB	2	171602134	C	T	-0.0121164	0.00186862	8.9002e-11	0.647671	462166		rs10184230		TRUE	reported	OrO3Oq
WC_UKB	2	175166636	G	A	-0.0131214	0.00184833	1.29987e-12	0.392393	462166		rs34234296		TRUE	reported	OrO3Oq
WC_UKB	2	181567556	T	A	0.0152662	0.00185779	2.09991e-16	0.631343	462166		rs1609303		TRUE	reported	OrO3Oq
WC_UKB	2	193811641	T	C	-0.0115796	0.00206169	1.89998e-08	0.252015	462166		rs12478299		TRUE	reported	OrO3Oq
WC_UKB	2	204053742	A	G	0.0112729	0.00179869	3.69999e-10	0.562997	462166		rs11675464		TRUE	reported	OrO3Oq
WC_UKB	2	205375909	C	A	-0.0258908	0.00335821	1.29987e-14	0.923005	462166		rs4482463		TRUE	reported	OrO3Oq
WC_UKB	2	212299249	A	C	0.0124046	0.00193905	1.6e-10	0.307294	462166		rs73985439		TRUE	reported	OrO3Oq
WC_UKB	2	213414265	A	G	-0.0141495	0.00203048	3.19963e-12	0.271197	462166		rs13427822		TRUE	reported	OrO3Oq
WC_UKB	2	229019109	A	C	0.0152073	0.00217889	2.99985e-12	0.213903	462166		rs72617140		TRUE	reported	OrO3Oq
WC_UKB	2	230627955	C	T	0.0157088	0.00191956	2.80027e-16	0.317213	462166		rs35882248		TRUE	reported	OrO3Oq
WC_UKB	3	9498143	G	A	0.0204929	0.00294652	3.50026e-12	0.102338	462166		rs62246311		TRUE	reported	OrO3Oq
WC_UKB	3	12393125	C	G	0.0192233	0.00274708	2.60016e-12	0.119579	462166		rs1801282		TRUE	reported	OrO3Oq
WC_UKB	3	12922716	A	T	-0.012262	0.00186101	4.40048e-11	0.632462	462166		rs361222		TRUE	reported	OrO3Oq
WC_UKB	3	15737698	T	C	-0.0119541	0.00182105	5.19996e-11	0.598143	462166		rs2470549		TRUE	reported	OrO3Oq
WC_UKB	3	25111890	C	A	0.0123148	0.00205988	2.30001e-09	0.750006	462166		rs6791983		TRUE	reported	OrO3Oq
WC_UKB	3	35635145	A	T	0.0163389	0.00220375	1.20005e-13	0.209589	462166		rs10490869		TRUE	reported	OrO3Oq
WC_UKB	3	42306294	A	G	0.0171188	0.00281552	1.2e-09	0.88661	462166		rs1799923		TRUE	reported	OrO3Oq
WC_UKB	3	42418446	A	G	-0.0139376	0.0023374	2.5e-09	0.820658	462166		rs28350		TRUE	reported	OrO3Oq
WC_UKB	3	44044344	C	T	-0.0100803	0.00179351	1.89998e-08	0.470416	462166		rs1554654		TRUE	reported	OrO3Oq
WC_UKB	3	49920571	T	C	0.0195793	0.00178819	6.70039e-28	0.511657	462166		rs9843653		TRUE	reported	OrO3Oq
WC_UKB	3	61163455	T	C	-0.0162995	0.00263949	6.59994e-10	0.133535	462166		rs74395133		TRUE	reported	OrO3Oq
WC_UKB	3	62482927	T	G	-0.0155648	0.00204876	2.99985e-14	0.259239	462166		rs62243489		TRUE	reported	OrO3Oq
WC_UKB	3	62713263	T	G	0.0120789	0.00193163	4e-10	0.312953	462166		rs557951		TRUE	reported	OrO3Oq
WC_UKB	3	85111108	C	T	0.013362	0.00179336	9.30037e-14	0.531552	462166		rs7630382		TRUE	reported	OrO3Oq
WC_UKB	3	85898626	A	G	-0.0148698	0.00190872	6.70039e-15	0.326101	462166		rs62261725		TRUE	reported	OrO3Oq
WC_UKB	3	88306596	A	G	0.016827	0.00239416	2.09991e-12	0.831916	462166		rs6551304		TRUE	reported	OrO3Oq
WC_UKB	3	94038085	C	G	-0.0161615	0.00178705	1.50003e-19	0.515372	462166		rs1454687		TRUE	reported	OrO3Oq
WC_UKB	3	104612668	A	G	0.0124929	0.00181185	5.40008e-12	0.582801	462166		rs1436348		TRUE	reported	OrO3Oq
WC_UKB	3	107340438	T	A	0.0101092	0.00179292	1.7e-08	0.463095	462166		rs654060		TRUE	reported	OrO3Oq
WC_UKB	3	123062657	T	G	-0.0111552	0.00187521	2.69998e-09	0.355886	462166		rs9814758		TRUE	reported	OrO3Oq
WC_UKB	3	131758077	G	A	0.017072	0.00191652	5.19996e-19	0.319725	462166		rs1320903		TRUE	reported	OrO3Oq
WC_UKB	3	136328270	T	C	0.0179179	0.00204033	1.59993e-18	0.740495	462166		rs1471740		TRUE	reported	OrO3Oq
WC_UKB	3	141178670	G	C	0.0144758	0.00183898	3.50026e-15	0.389039	462166		rs9289630		TRUE	reported	OrO3Oq
WC_UKB	3	147134039	A	G	0.0156855	0.00260901	1.79999e-09	0.136472	462166		rs12107172		TRUE	reported	OrO3Oq
WC_UKB	3	153691949	T	C	0.011183	0.00180784	6.19998e-10	0.570076	462166		rs1357079		TRUE	reported	OrO3Oq
WC_UKB	3	156795468	A	G	-0.0169561	0.00182964	1.9002e-20	0.404446	462166		rs13322435		TRUE	reported	OrO3Oq
WC_UKB	3	161441672	G	C	0.0113622	0.00178653	2e-10	0.540751	462166		rs4856717		TRUE	reported	OrO3Oq
WC_UKB	3	170724883	T	C	0.0159923	0.00196858	4.49987e-16	0.288645	462166		rs8192675		TRUE	reported	OrO3Oq
WC_UKB	3	173747092	C	G	-0.0120513	0.00206049	5e-09	0.250101	462166		rs1117619		TRUE	reported	OrO3Oq
WC_UKB	3	185828465	T	C	-0.0210096	0.00230513	7.89951e-20	0.184916	462166		rs73052033		TRUE	reported	OrO3Oq
WC_UKB	3	196149165	C	A	0.0118947	0.00186339	1.7e-10	0.357239	462166		rs7372674		TRUE	reported	OrO3Oq
WC_UKB	4	951179	G	A	-0.00995199	0.00179742	3.09999e-08	0.544526	462166		rs1051613		TRUE	reported	OrO3Oq
WC_UKB	4	6490789	T	C	-0.0108689	0.00178976	1.29999e-09	0.525445	462166		rs4689465		TRUE	reported	OrO3Oq
WC_UKB	4	18477030	C	G	0.0123073	0.00191467	1.29999e-10	0.320508	462166		rs6846041		TRUE	reported	OrO3Oq
WC_UKB	4	20120274	C	T	0.0218636	0.00270973	7.10068e-16	0.12428	462166		rs6849518		TRUE	reported	OrO3Oq
WC_UKB	4	30842780	A	G	0.0105243	0.00179433	4.49997e-09	0.541317	462166		rs4527444		TRUE	reported	OrO3Oq
WC_UKB	4	45186139	G	A	0.0222115	0.00180756	1e-34	0.433578	462166		rs10938398		TRUE	reported	OrO3Oq
WC_UKB	4	52932825	C	T	-0.0123292	0.00201975	1e-09	0.731966	462166		rs3113509		TRUE	reported	OrO3Oq
WC_UKB	4	65651730	G	A	-0.0106038	0.00182614	6.4e-09	0.40501	462166		rs1346841		TRUE	reported	OrO3Oq
WC_UKB	4	67802992	A	G	-0.0130094	0.0021745	2.19999e-09	0.783206	462166		rs923994		TRUE	reported	OrO3Oq
WC_UKB	4	89054667	A	G	-0.0189755	0.00281242	1.50003e-11	0.113256	462166		rs4148155		TRUE	reported	OrO3Oq
WC_UKB	4	96150044	A	T	0.0112635	0.00181962	5.99998e-10	0.407376	462166		rs4419475		TRUE	reported	OrO3Oq
WC_UKB	4	100239319	T	C	0.0301377	0.00542443	2.80001e-08	0.972777	462166		rs1229984		TRUE	reported	OrO3Oq
WC_UKB	4	102133144	C	T	-0.0113759	0.00203018	2.1e-08	0.734555	462166		rs4525978		TRUE	reported	OrO3Oq
WC_UKB	4	102708997	C	A	0.0143396	0.00181913	3.19963e-15	0.431061	462166		rs7377083		TRUE	reported	OrO3Oq
WC_UKB	4	113256737	G	T	0.0101403	0.00181938	2.5e-08	0.410212	462166		rs59068084		TRUE	reported	OrO3Oq
WC_UKB	4	130724902	C	T	-0.0112449	0.00186604	1.7e-09	0.640565	462166		rs11099020		TRUE	reported	OrO3Oq
WC_UKB	4	137083193	A	C	-0.0131912	0.00180908	3.10027e-13	0.559023	462166		rs1296328		TRUE	reported	OrO3Oq
WC_UKB	4	162091639	T	C	0.0108432	0.00178995	1.40001e-09	0.51907	462166		rs6536575		TRUE	reported	OrO3Oq
WC_UKB	4	180168024	G	A	-0.0101871	0.00184913	3.59998e-08	0.621776	462166		rs1037702		TRUE	reported	OrO3Oq
WC_UKB	5	299621	T	C	0.0170405	0.00266903	1.7e-10	0.129259	462166		rs9654453		TRUE	reported	OrO3Oq
WC_UKB	5	741999	A	G	0.012086	0.00215599	2.1e-08	0.756094	462166		rs400031		TRUE	reported	OrO3Oq
WC_UKB	5	55860866	G	T	0.0137147	0.0022268	7.29995e-10	0.201255	462166		rs3936510		TRUE	reported	OrO3Oq
WC_UKB	5	63979856	G	A	-0.010111	0.00182385	2.99999e-08	0.508891	462166		rs10471636		TRUE	reported	OrO3Oq
WC_UKB	5	66164160	A	C	0.0111762	0.001867	2.1e-09	0.635311	462166		rs36140		TRUE	reported	OrO3Oq
WC_UKB	5	75003678	T	C	-0.0239722	0.0018299	3.29989e-39	0.394972	462166		rs2307111		TRUE	reported	OrO3Oq
WC_UKB	5	77801359	A	G	-0.0111634	0.00203598	4.20001e-08	0.739809	462166		rs876605		TRUE	reported	OrO3Oq
WC_UKB	5	80881374	A	G	-0.0105989	0.00191107	2.90001e-08	0.327165	462166		rs67002381		TRUE	reported	OrO3Oq
WC_UKB	5	87682877	C	G	-0.0204724	0.00218339	6.79986e-21	0.214033	462166		rs7442885		TRUE	reported	OrO3Oq
WC_UKB	5	87986314	C	A	0.0270483	0.0026269	7.29962e-25	0.136355	462166		rs34483452		TRUE	reported	OrO3Oq
WC_UKB	5	92251840	C	A	0.0165927	0.00281561	3.79997e-09	0.117046	462166		rs67632512		TRUE	reported	OrO3Oq
WC_UKB	5	103945178	C	T	0.0142773	0.00180004	2.19989e-15	0.437804	462166		rs2161097		TRUE	reported	OrO3Oq
WC_UKB	5	107439012	G	A	-0.0156125	0.00238663	6.09958e-11	0.170153	462166		rs40067		TRUE	reported	OrO3Oq
WC_UKB	5	112301096	C	T	0.0107407	0.00187307	9.80009e-09	0.371988	462166		rs1625623		TRUE	reported	OrO3Oq
WC_UKB	5	119389031	C	G	0.0126307	0.00181978	3.90032e-12	0.472292	462166		rs347551		TRUE	reported	OrO3Oq
WC_UKB	5	122657199	G	A	-0.0138548	0.00180588	1.69981e-14	0.473264	462166		rs1582931		TRUE	reported	OrO3Oq
WC_UKB	5	130391918	A	G	-0.0134593	0.00216831	5.39995e-10	0.217047	462166		rs4706004		TRUE	reported	OrO3Oq
WC_UKB	5	136571959	G	A	-0.00988959	0.00179351	3.50002e-08	0.466047	462166		rs13163306		TRUE	reported	OrO3Oq
WC_UKB	5	139086651	A	T	-0.0122441	0.00185284	3.90032e-11	0.611063	462166		rs2133561		TRUE	reported	OrO3Oq
WC_UKB	5	142712064	G	A	-0.00983151	0.00179325	4.20001e-08	0.459562	462166		rs852983		TRUE	reported	OrO3Oq
WC_UKB	5	153210953	A	T	-0.0115211	0.00189126	1.09999e-09	0.662728	462166		rs4469245		TRUE	reported	OrO3Oq
WC_UKB	5	153543466	A	G	-0.0121976	0.00180534	1.39991e-11	0.572375	462166		rs7708584		TRUE	reported	OrO3Oq
WC_UKB	5	164574688	G	A	-0.0101695	0.00184128	3.29997e-08	0.616568	462166		rs4552632		TRUE	reported	OrO3Oq
WC_UKB	5	170525393	A	G	0.0145976	0.00201635	4.49987e-13	0.730365	462166		rs245767		TRUE	reported	OrO3Oq
WC_UKB	6	2064264	A	C	0.0130316	0.00211353	7.00003e-10	0.234005	462166		rs9378676		TRUE	reported	OrO3Oq
WC_UKB	6	12142817	A	G	-0.0127212	0.0018605	8.10028e-12	0.371789	462166		rs10947793		TRUE	reported	OrO3Oq
WC_UKB	6	13180454	T	C	-0.012784	0.00194427	4.90004e-11	0.303836	462166		rs11757278		TRUE	reported	OrO3Oq
WC_UKB	6	15230743	G	A	-0.0149011	0.00255067	5.19996e-09	0.143939	462166		rs112266013		TRUE	reported	OrO3Oq
WC_UKB	6	20482335	G	A	-0.0108144	0.00192005	1.79999e-08	0.668366	462166		rs3806114		TRUE	reported	OrO3Oq
WC_UKB	6	26159356	G	A	-0.0220783	0.00213628	4.90004e-25	0.225006	462166		rs2183947		TRUE	reported	OrO3Oq
WC_UKB	6	31671498	T	C	-0.0187659	0.00265145	1.50003e-12	0.130582	462166		rs28366156		TRUE	reported	OrO3Oq
WC_UKB	6	33389603	C	T	0.0177008	0.00253183	2.70023e-12	0.145139	462166		rs7752202		TRUE	reported	OrO3Oq
WC_UKB	6	34552110	A	G	0.0319686	0.00251588	5.40008e-37	0.147512	462166		rs2744938		TRUE	reported	OrO3Oq
WC_UKB	6	40369081	C	T	0.0203746	0.00189485	5.79963e-27	0.334413	462166		rs34045288		TRUE	reported	OrO3Oq
WC_UKB	6	50816887	G	T	0.0301404	0.00237148	5.19996e-37	0.172259	462166		rs72892910		TRUE	reported	OrO3Oq
WC_UKB	6	51177811	A	G	-0.0115864	0.0018403	3.09999e-10	0.387739	462166		rs1327259		TRUE	reported	OrO3Oq
WC_UKB	6	51769619	A	G	0.0141389	0.00187835	5.19996e-14	0.345354	462166		rs1321519		TRUE	reported	OrO3Oq
WC_UKB	6	53789830	G	T	0.0195525	0.00325673	1.89998e-09	0.082226	462166		rs9370243		TRUE	reported	OrO3Oq
WC_UKB	6	70218298	A	T	0.0120451	0.00204452	3.79997e-09	0.743189	462166		rs1570298		TRUE	reported	OrO3Oq
WC_UKB	6	81346033	T	C	0.0109526	0.00181038	1.40001e-09	0.562316	462166		rs1902066		TRUE	reported	OrO3Oq
WC_UKB	6	83433228	G	A	0.0131781	0.00179925	2.39994e-13	0.476584	462166		rs9294260		TRUE	reported	OrO3Oq
WC_UKB	6	97947755	C	G	-0.0132827	0.00202893	5.90065e-11	0.268616	462166		rs10499014		TRUE	reported	OrO3Oq
WC_UKB	6	98421721	T	C	0.0120106	0.001827	4.90004e-11	0.601488	462166		rs6938973		TRUE	reported	OrO3Oq
WC_UKB	6	108888593	C	G	0.018205	0.00184715	6.4998e-23	0.626102	462166		rs2253310		TRUE	reported	OrO3Oq
WC_UKB	6	124897878	G	T	-0.0125051	0.00197262	2.30001e-10	0.701359	462166		rs520478		TRUE	reported	OrO3Oq
WC_UKB	6	127440047	T	C	0.0306437	0.0041713	1.99986e-13	0.049503	462166		rs577721086		TRUE	reported	OrO3Oq
WC_UKB	6	143185891	A	G	-0.00980862	0.00178785	4.09996e-08	0.489495	462166		rs765876		TRUE	reported	OrO3Oq
WC_UKB	6	153364643	G	T	0.010917	0.00198683	3.89996e-08	0.282559	462166		rs7755574		TRUE	reported	OrO3Oq
WC_UKB	6	154333183	T	C	0.0145491	0.00242098	1.89998e-09	0.164212	462166		rs9478496		TRUE	reported	OrO3Oq
WC_UKB	6	163009335	G	A	-0.0165685	0.00259543	1.7e-10	0.137694	462166		rs36007635		TRUE	reported	OrO3Oq
WC_UKB	7	2862542	C	A	-0.0135196	0.00194469	3.59998e-12	0.3044	462166		rs1182199		TRUE	reported	OrO3Oq
WC_UKB	7	3125220	C	T	0.0168104	0.00260196	1e-10	0.136117	462166		rs4722398		TRUE	reported	OrO3Oq
WC_UKB	7	26385763	C	T	-0.0153436	0.00241309	2e-10	0.170691	462166		rs73068448		TRUE	reported	OrO3Oq
WC_UKB	7	32378979	G	A	-0.0125095	0.00184246	1.10002e-11	0.611654	462166		rs215669		TRUE	reported	OrO3Oq
WC_UKB	7	39448936	C	T	-0.0109575	0.00188895	6.59994e-09	0.337855	462166		rs2237403		TRUE	reported	OrO3Oq
WC_UKB	7	50564204	G	T	-0.012149	0.00180583	1.69981e-11	0.438304	462166		rs3807566		TRUE	reported	OrO3Oq
WC_UKB	7	70038969	G	T	0.0122483	0.00182202	1.80011e-11	0.413175	462166		rs4718964		TRUE	reported	OrO3Oq
WC_UKB	7	71620988	G	A	-0.0150345	0.00231875	8.9002e-11	0.181372	462166		rs11767811		TRUE	reported	OrO3Oq
WC_UKB	7	75081418	C	T	-0.0165812	0.00181678	7.10068e-20	0.419271	462166		rs58862095		TRUE	reported	OrO3Oq
WC_UKB	7	76568600	T	C	-0.015593	0.00245777	2.19999e-10	0.84158	462166		rs7792176		TRUE	reported	OrO3Oq
WC_UKB	7	77825224	C	T	0.0118827	0.00208233	1.2e-08	0.755598	462166		rs3729628		TRUE	reported	OrO3Oq
WC_UKB	7	92253972	G	A	0.0119597	0.00190774	3.59998e-10	0.326456	462166		rs10269774		TRUE	reported	OrO3Oq
WC_UKB	7	99047978	T	C	-0.0176676	0.00247511	9.49948e-13	0.154427	462166		rs883403		TRUE	reported	OrO3Oq
WC_UKB	7	103416541	C	A	0.0132187	0.00182044	3.80014e-13	0.424364	462166		rs12375196		TRUE	reported	OrO3Oq
WC_UKB	7	104587323	G	T	0.011687	0.00182473	1.5e-10	0.401445	462166		rs2470946		TRUE	reported	OrO3Oq
WC_UKB	7	114588540	A	G	0.0200862	0.00324046	5.69994e-10	0.91694	462166		rs4344019		TRUE	reported	OrO3Oq
WC_UKB	7	121963813	C	A	0.0132553	0.00185427	8.80035e-13	0.366037	462166		rs10248298		TRUE	reported	OrO3Oq
WC_UKB	7	133516821	G	A	-0.014525	0.00261481	2.80001e-08	0.135429	462166		rs55794894		TRUE	reported	OrO3Oq
WC_UKB	7	147668180	C	T	-0.0104772	0.0018937	3.2e-08	0.336125	462166		rs11773362		TRUE	reported	OrO3Oq
WC_UKB	7	150668070	C	T	0.013799	0.00187561	1.9002e-13	0.641963	462166		rs10236214		TRUE	reported	OrO3Oq
WC_UKB	8	14207321	C	T	0.0127734	0.00197882	1.09999e-10	0.286025	462166		rs1559900		TRUE	reported	OrO3Oq
WC_UKB	8	25666169	C	T	0.0107189	0.00196197	4.70002e-08	0.298501	462166		rs59104534		TRUE	reported	OrO3Oq
WC_UKB	8	27167942	T	C	0.0149141	0.00222979	2.29985e-11	0.20186	462166		rs17446091		TRUE	reported	OrO3Oq
WC_UKB	8	30854033	A	G	-0.0154452	0.00195255	2.60016e-15	0.696098	462166		rs2725371		TRUE	reported	OrO3Oq
WC_UKB	8	38329650	C	T	0.0114574	0.00182669	3.59998e-10	0.39881	462166		rs36061954		TRUE	reported	OrO3Oq
WC_UKB	8	60220423	T	A	0.0139437	0.00244363	1.2e-08	0.159639	462166		rs10957087		TRUE	reported	OrO3Oq
WC_UKB	8	64702385	A	T	-0.0122831	0.00181048	1.20005e-11	0.428948	462166		rs13264909		TRUE	reported	OrO3Oq
WC_UKB	8	73449940	G	A	-0.0195133	0.00197942	6.29941e-23	0.709022	462166		rs7845090		TRUE	reported	OrO3Oq
WC_UKB	8	77227464	A	G	0.0149337	0.00180594	1.29987e-16	0.565725	462166		rs1609010		TRUE	reported	OrO3Oq
WC_UKB	8	95578426	C	T	-0.0108645	0.00198784	4.60002e-08	0.284228	462166		rs10111287		TRUE	reported	OrO3Oq
WC_UKB	8	103545192	C	A	0.0125482	0.00216798	7.10003e-09	0.218678	462166		rs13273726		TRUE	reported	OrO3Oq
WC_UKB	8	116551405	C	G	-0.0122168	0.00179945	1.10002e-11	0.536065	462166		rs11778934		TRUE	reported	OrO3Oq
WC_UKB	8	116671848	A	G	0.0150085	0.0019947	5.30029e-14	0.720239	462166		rs4876611		TRUE	reported	OrO3Oq
WC_UKB	8	118881908	T	A	0.0164111	0.00292178	1.89998e-08	0.106468	462166		rs12549000		TRUE	reported	OrO3Oq
WC_UKB	8	142617261	C	G	0.0118941	0.00187751	2.39999e-10	0.375059	462166		rs746839		TRUE	reported	OrO3Oq
WC_UKB	8	143300279	G	A	0.0117189	0.0017994	7.39946e-11	0.474253	462166		rs4072917		TRUE	reported	OrO3Oq
WC_UKB	9	15857875	T	C	-0.0147232	0.00180496	3.40017e-16	0.44248	462166		rs4740627		TRUE	reported	OrO3Oq
WC_UKB	9	16720329	G	C	0.0142288	0.00231818	8.40001e-10	0.182738	462166		rs10962550		TRUE	reported	OrO3Oq
WC_UKB	9	23226898	C	G	-0.0105597	0.00188105	2e-08	0.365048	462166		rs1111817		TRUE	reported	OrO3Oq
WC_UKB	9	28418511	G	A	0.0190501	0.00191229	2.19989e-23	0.32166	462166		rs13288841		TRUE	reported	OrO3Oq
WC_UKB	9	34074476	T	C	0.0109331	0.00185543	3.79997e-09	0.367701	462166		rs12001437		TRUE	reported	OrO3Oq
WC_UKB	9	37081301	A	G	-0.0112644	0.00184813	1.09999e-09	0.373813	462166		rs7034554		TRUE	reported	OrO3Oq
WC_UKB	9	73796450	C	T	0.00979421	0.00178924	4.39997e-08	0.48157	462166		rs1360201		TRUE	reported	OrO3Oq
WC_UKB	9	81348300	T	C	-0.0162997	0.00257242	2.39999e-10	0.859489	462166		rs1619442		TRUE	reported	OrO3Oq
WC_UKB	9	92178472	T	A	0.0115117	0.00180564	1.79999e-10	0.538137	462166		rs3949781		TRUE	reported	OrO3Oq
WC_UKB	9	94182363	G	T	-0.0115642	0.00180618	1.5e-10	0.426761	462166		rs2482704		TRUE	reported	OrO3Oq
WC_UKB	9	96437565	T	C	-0.0112545	0.00192897	5.39995e-09	0.681971	462166		rs10992854		TRUE	reported	OrO3Oq
WC_UKB	9	103089143	C	G	0.0124912	0.00192172	8.00018e-11	0.315942	462166		rs4742782		TRUE	reported	OrO3Oq
WC_UKB	9	122957315	A	T	0.0124023	0.00187454	3.69999e-11	0.643153	462166		rs1019240		TRUE	reported	OrO3Oq
WC_UKB	9	126586563	C	A	0.0143082	0.00206705	4.49987e-12	0.250696	462166		rs1752169		TRUE	reported	OrO3Oq
WC_UKB	9	131026108	G	A	0.0153033	0.00249349	8.40001e-10	0.153027	462166		rs113132247		TRUE	reported	OrO3Oq
WC_UKB	10	16773864	G	A	0.0129878	0.00194957	2.70023e-11	0.677994	462166		rs7094644		TRUE	reported	OrO3Oq
WC_UKB	10	21830104	A	G	0.0193536	0.00190117	2.39994e-24	0.331675	462166		rs11012732		TRUE	reported	OrO3Oq
WC_UKB	10	33971383	G	A	0.0223778	0.00335663	2.60016e-11	0.076924	462166		rs71495038		TRUE	reported	OrO3Oq
WC_UKB	10	34822258	C	T	0.0116104	0.0019302	1.79999e-09	0.314309	462166		rs10827380		TRUE	reported	OrO3Oq
WC_UKB	10	36227101	T	C	0.0112571	0.00199327	1.6e-08	0.720419	462166		rs2696309		TRUE	reported	OrO3Oq
WC_UKB	10	61842645	C	T	-0.0120318	0.00191737	3.50002e-10	0.327941	462166		rs7070670		TRUE	reported	OrO3Oq
WC_UKB	10	76363107	C	T	0.0150646	0.00259306	6.29999e-09	0.139518	462166		rs10824211		TRUE	reported	OrO3Oq
WC_UKB	10	80941885	A	G	-0.0114394	0.00181827	3.09999e-10	0.415045	462166		rs703983		TRUE	reported	OrO3Oq
WC_UKB	10	87562928	A	C	0.023047	0.00347158	3.19963e-11	0.072559	462166		rs12245654		TRUE	reported	OrO3Oq
WC_UKB	10	88096047	G	C	0.0106684	0.00179976	3.09999e-09	0.497514	462166		rs10887578		TRUE	reported	OrO3Oq
WC_UKB	10	99778226	A	G	0.0155254	0.00180145	6.79986e-18	0.545601	462166		rs2439823		TRUE	reported	OrO3Oq
WC_UKB	10	102415609	G	A	-0.0105885	0.00189213	2.19999e-08	0.344101	462166		rs4075353		TRUE	reported	OrO3Oq
WC_UKB	10	104610926	G	T	0.0113777	0.00183305	5.39995e-10	0.392697	462166		rs4290163		TRUE	reported	OrO3Oq
WC_UKB	10	115976570	T	C	0.0124451	0.00210599	3.40001e-09	0.236715	462166		rs11196657		TRUE	reported	OrO3Oq
WC_UKB	10	118777371	C	T	0.0153066	0.00208556	2.09991e-13	0.254549	462166		rs10787738		TRUE	reported	OrO3Oq
WC_UKB	10	126640936	T	C	0.011102	0.00199233	2.5e-08	0.283612	462166		rs67609008		TRUE	reported	OrO3Oq
WC_UKB	10	133978962	T	C	-0.0121742	0.00181299	1.9002e-11	0.578709	462166		rs2172131		TRUE	reported	OrO3Oq
WC_UKB	11	8682018	C	T	-0.0173687	0.0020032	4.30031e-18	0.276578	462166		rs1502317		TRUE	reported	OrO3Oq
WC_UKB	11	13346294	T	C	0.012491	0.00187069	2.39994e-11	0.635754	462166		rs11824092		TRUE	reported	OrO3Oq
WC_UKB	11	27712381	A	G	0.0250906	0.00191723	3.90032e-39	0.318423	462166		rs1013402		TRUE	reported	OrO3Oq
WC_UKB	11	30329744	T	C	0.015797	0.00213642	1.39991e-13	0.774104	462166		rs2225909		TRUE	reported	OrO3Oq
WC_UKB	11	30531316	C	G	0.0123512	0.00209843	4e-09	0.240436	462166		rs10835676		TRUE	reported	OrO3Oq
WC_UKB	11	43707364	C	T	0.0173643	0.00192251	1.69981e-19	0.317318	462166		rs35243581		TRUE	reported	OrO3Oq
WC_UKB	11	43934592	C	T	-0.0106394	0.00180461	3.69999e-09	0.442738	462166		rs7115013		TRUE	reported	OrO3Oq
WC_UKB	11	47606865	G	C	0.0210638	0.00197238	1.29987e-26	0.707082	462166		rs12287076		TRUE	reported	OrO3Oq
WC_UKB	11	65647105	A	G	0.0145982	0.00240459	1.29999e-09	0.165688	462166		rs12225345		TRUE	reported	OrO3Oq
WC_UKB	11	67024534	C	T	-0.0289945	0.00326001	5.90065e-19	0.081988	462166		rs7952436		TRUE	reported	OrO3Oq
WC_UKB	11	85238368	G	T	-0.0169839	0.00261937	8.9002e-11	0.135129	462166		rs11603984		TRUE	reported	OrO3Oq
WC_UKB	11	89922417	A	G	0.0134514	0.00205497	5.90065e-11	0.254942	462166		rs61903695		TRUE	reported	OrO3Oq
WC_UKB	11	113266411	A	C	-0.0113409	0.00178977	2.39999e-10	0.508297	462166		rs35023999		TRUE	reported	OrO3Oq
WC_UKB	11	115022233	T	C	0.0111759	0.00179363	4.60002e-10	0.525856	462166		rs11215381		TRUE	reported	OrO3Oq
WC_UKB	11	116911012	C	T	0.0222638	0.00387781	9.40005e-09	0.056494	462166		rs12273545		TRUE	reported	OrO3Oq
WC_UKB	11	118941596	G	A	0.0140407	0.00182953	1.69981e-14	0.396115	462166		rs7925100		TRUE	reported	OrO3Oq
WC_UKB	11	121922587	G	A	-0.0115323	0.00182872	2.90001e-10	0.40049	462166		rs11218510		TRUE	reported	OrO3Oq
WC_UKB	11	130796248	A	G	0.0108889	0.00179888	1.40001e-09	0.507544	462166		rs7933085		TRUE	reported	OrO3Oq
WC_UKB	11	132652554	A	G	0.0122154	0.00180899	1.50003e-11	0.434214	462166		rs11223204		TRUE	reported	OrO3Oq
WC_UKB	11	134611390	C	T	0.0159528	0.00234105	9.49948e-12	0.183665	462166		rs111258054		TRUE	reported	OrO3Oq
WC_UKB	12	991306	G	A	0.0199369	0.00219529	1.10002e-19	0.209735	462166		rs55726687		TRUE	reported	OrO3Oq
WC_UKB	12	4384844	T	G	0.0484187	0.00693063	2.80027e-12	0.020689	462166		rs76895963		TRUE	reported	OrO3Oq
WC_UKB	12	17170000	G	A	-0.0110533	0.00195421	1.5e-08	0.300854	462166		rs10772985		TRUE	reported	OrO3Oq
WC_UKB	12	19288508	A	C	0.0152705	0.00259774	4.09996e-09	0.860023	462166		rs10505836		TRUE	reported	OrO3Oq
WC_UKB	12	24060075	G	C	0.0154364	0.00278463	2.99999e-08	0.11701	462166		rs10842240		TRUE	reported	OrO3Oq
WC_UKB	12	41887940	C	T	0.0146036	0.00179105	3.50026e-16	0.488413	462166		rs1458156		TRUE	reported	OrO3Oq
WC_UKB	12	50263148	G	A	0.0215129	0.00183998	1.39991e-31	0.384454	462166		rs7132908		TRUE	reported	OrO3Oq
WC_UKB	12	54418166	A	G	0.0157371	0.00186806	3.59998e-17	0.362765	462166		rs894736		TRUE	reported	OrO3Oq
WC_UKB	12	89771903	T	C	0.0146223	0.00179659	4.00037e-16	0.455057	462166		rs704061		TRUE	reported	OrO3Oq
WC_UKB	12	97550852	A	G	-0.0102658	0.00184312	2.5e-08	0.605139	462166		rs735033		TRUE	reported	OrO3Oq
WC_UKB	12	103648717	T	A	-0.0123105	0.00182011	1.29987e-11	0.576411	462166		rs2373980		TRUE	reported	OrO3Oq
WC_UKB	12	108618630	C	T	-0.0160772	0.00203505	2.80027e-15	0.261552	462166		rs3764002		TRUE	reported	OrO3Oq
WC_UKB	12	114539979	T	C	-0.0208268	0.00370775	1.89998e-08	0.062969	462166		rs76653871		TRUE	reported	OrO3Oq
WC_UKB	12	120907309	T	A	-0.0322326	0.00458244	1.99986e-12	0.039615	462166		rs145350287		TRUE	reported	OrO3Oq
WC_UKB	12	122530256	T	C	0.0107118	0.00178943	2.1e-09	0.478618	462166		rs36165342		TRUE	reported	OrO3Oq
WC_UKB	12	122940075	A	G	0.0159705	0.00206852	1.20005e-14	0.750601	462166		rs11058233		TRUE	reported	OrO3Oq
WC_UKB	12	133404805	C	G	0.0133551	0.0019396	5.79963e-12	0.30747	462166		rs900448		TRUE	reported	OrO3Oq
WC_UKB	13	28010734	G	A	0.012491	0.00189332	4.19952e-11	0.661499	462166		rs1218824		TRUE	reported	OrO3Oq
WC_UKB	13	31042452	G	T	-0.0127878	0.00204439	4e-10	0.259942	462166		rs11842871		TRUE	reported	OrO3Oq
WC_UKB	13	40784814	T	G	0.012489	0.00190819	6.00067e-11	0.328585	462166		rs1336486		TRUE	reported	OrO3Oq
WC_UKB	13	54107352	G	A	0.022614	0.00268971	4.19952e-17	0.129253	462166		rs9568867		TRUE	reported	OrO3Oq
WC_UKB	13	54354615	T	C	-0.0156101	0.00224739	3.80014e-12	0.801292	462166		rs9316661		TRUE	reported	OrO3Oq
WC_UKB	13	58480400	T	C	-0.0179391	0.00238486	5.40008e-14	0.17033	462166		rs34140906		TRUE	reported	OrO3Oq
WC_UKB	13	65484906	T	C	0.0121297	0.00210064	7.69999e-09	0.761254	462166		rs7324067		TRUE	reported	OrO3Oq
WC_UKB	13	79580919	G	A	0.0150095	0.00186203	7.59976e-16	0.593703	462166		rs1441264		TRUE	reported	OrO3Oq
WC_UKB	13	86484042	G	A	0.011857	0.0020127	3.79997e-09	0.278938	462166		rs61969511		TRUE	reported	OrO3Oq
WC_UKB	13	97047020	G	A	0.0117224	0.00181553	1.09999e-10	0.442217	462166		rs12877270		TRUE	reported	OrO3Oq
WC_UKB	13	99245866	T	C	-0.0108139	0.00189234	1.09999e-08	0.366117	462166		rs9584870		TRUE	reported	OrO3Oq
WC_UKB	13	107854612	C	T	0.0108325	0.00182556	2.99999e-09	0.538081	462166		rs9888533		TRUE	reported	OrO3Oq
WC_UKB	13	109835686	G	A	-0.0115336	0.00179638	1.40001e-10	0.481363	462166		rs484455		TRUE	reported	OrO3Oq
WC_UKB	13	112191837	C	G	-0.0120589	0.00186172	9.30037e-11	0.37014	462166		rs1183668		TRUE	reported	OrO3Oq
WC_UKB	14	25935161	G	A	-0.0166203	0.00201799	1.80011e-16	0.269555	462166		rs7154982		TRUE	reported	OrO3Oq
WC_UKB	14	29690513	T	C	0.0179823	0.00213539	3.69999e-17	0.771831	462166		rs2180454		TRUE	reported	OrO3Oq
WC_UKB	14	30101641	C	A	-0.0108005	0.00183345	3.79997e-09	0.59357	462166		rs1191600		TRUE	reported	OrO3Oq
WC_UKB	14	47306418	G	A	-0.0114279	0.00179331	1.89998e-10	0.507101	462166		rs4900715		TRUE	reported	OrO3Oq
WC_UKB	14	56462082	A	G	0.0102398	0.00181136	1.6e-08	0.551608	462166		rs1188209		TRUE	reported	OrO3Oq
WC_UKB	14	62361021	A	C	0.012731	0.0020176	2.80001e-10	0.271758	462166		rs217672		TRUE	reported	OrO3Oq
WC_UKB	14	79891882	G	A	0.0219574	0.00216957	4.49987e-24	0.22035	462166		rs10150482		TRUE	reported	OrO3Oq
WC_UKB	14	94023972	G	A	0.0161584	0.00186502	4.60045e-18	0.636022	462166		rs6575340		TRUE	reported	OrO3Oq
WC_UKB	14	101186626	A	G	0.0180478	0.00311766	7.10003e-09	0.092347	462166		rs11160600		TRUE	reported	OrO3Oq
WC_UKB	14	101531854	A	G	-0.0130005	0.00187164	3.80014e-12	0.491969	462166		rs61992671		TRUE	reported	OrO3Oq
WC_UKB	14	103251452	T	G	-0.0138449	0.00188965	2.39994e-13	0.661581	462166		rs12880641		TRUE	reported	OrO3Oq
WC_UKB	14	104178186	A	G	0.0126546	0.00191072	3.50026e-11	0.328517	462166		rs3212038		TRUE	reported	OrO3Oq
WC_UKB	15	35837297	A	T	0.0136852	0.00250296	4.60002e-08	0.848193	462166		rs8024137		TRUE	reported	OrO3Oq
WC_UKB	15	36391965	C	T	0.0107144	0.00179296	2.30001e-09	0.502804	462166		rs11636611		TRUE	reported	OrO3Oq
WC_UKB	15	51754451	T	C	-0.013082	0.001805	4.19952e-13	0.54539	462166		rs6493498		TRUE	reported	OrO3Oq
WC_UKB	15	53163603	G	A	0.0151663	0.00245648	6.69993e-10	0.160621	462166		rs80243702		TRUE	reported	OrO3Oq
WC_UKB	15	57120989	G	A	-0.0142481	0.00224816	2.30001e-10	0.802922	462166		rs1657930		TRUE	reported	OrO3Oq
WC_UKB	15	67988133	C	T	0.0185824	0.00182662	2.60016e-24	0.601752	462166		rs3784692		TRUE	reported	OrO3Oq
WC_UKB	15	73227249	G	A	0.0128894	0.00189898	1.10002e-11	0.660202	462166		rs7171864		TRUE	reported	OrO3Oq
WC_UKB	15	80991447	T	C	-0.014559	0.00195866	1.10002e-13	0.297289	462166		rs34994596		TRUE	reported	OrO3Oq
WC_UKB	15	84557450	A	C	-0.0156228	0.00199629	5.00035e-15	0.280671	462166		rs17296856		TRUE	reported	OrO3Oq
WC_UKB	15	92573639	G	A	-0.0151498	0.00219298	4.90004e-12	0.217312	462166		rs7498044		TRUE	reported	OrO3Oq
WC_UKB	15	95272920	G	T	-0.0102703	0.00186771	3.79997e-08	0.635678	462166		rs7169847		TRUE	reported	OrO3Oq
WC_UKB	15	99222509	A	G	-0.0127745	0.00214599	2.59998e-09	0.226708	462166		rs56803094		TRUE	reported	OrO3Oq
WC_UKB	16	406427	G	C	-0.0124576	0.00187714	3.19963e-11	0.353624	462166		rs12926311		TRUE	reported	OrO3Oq
WC_UKB	16	2175373	T	C	-0.022678	0.00232636	1.9002e-22	0.182682	462166		rs13333747		TRUE	reported	OrO3Oq
WC_UKB	16	4015729	C	T	0.0194431	0.00184223	4.90004e-26	0.613194	462166		rs879620		TRUE	reported	OrO3Oq
WC_UKB	16	4949528	G	T	-0.0130789	0.00187766	3.29989e-12	0.645058	462166		rs28375268		TRUE	reported	OrO3Oq
WC_UKB	16	9370690	A	C	-0.011872	0.00207809	1.09999e-08	0.250798	462166		rs11639596		TRUE	reported	OrO3Oq
WC_UKB	16	19941968	T	C	-0.0132587	0.00230452	8.70001e-09	0.184548	462166		rs9926784		TRUE	reported	OrO3Oq
WC_UKB	16	24726237	A	G	0.0124779	0.00180782	5.10035e-12	0.569108	462166		rs12103006		TRUE	reported	OrO3Oq
WC_UKB	16	28883241	A	G	0.026616	0.00182769	4.90004e-48	0.399688	462166		rs7498665		TRUE	reported	OrO3Oq
WC_UKB	16	29994922	C	T	0.0239816	0.00179535	1.10002e-40	0.482382	462166		rs3814883		TRUE	reported	OrO3Oq
WC_UKB	16	53799507	G	A	0.0554856	0.00180966	1e-200	0.424278	462166		rs9937053		TRUE	reported	OrO3Oq
WC_UKB	16	69651866	C	T	-0.0180264	0.0018218	4.40048e-23	0.409625	462166		rs862320		TRUE	reported	OrO3Oq
WC_UKB	16	72996162	G	A	-0.0107152	0.00184896	6.80002e-09	0.399071	462166		rs756717		TRUE	reported	OrO3Oq
WC_UKB	16	73602926	A	G	-0.0109798	0.00179141	8.79995e-10	0.457951	462166		rs862227		TRUE	reported	OrO3Oq
WC_UKB	16	76895693	A	G	0.0109063	0.00179863	1.29999e-09	0.490971	462166		rs9673839		TRUE	reported	OrO3Oq
WC_UKB	16	82451159	T	G	-0.010284	0.00186623	3.59998e-08	0.639097	462166		rs1025065		TRUE	reported	OrO3Oq
WC_UKB	16	82872628	C	G	0.0120004	0.00191641	3.79997e-10	0.321623	462166		rs7206608		TRUE	reported	OrO3Oq
WC_UKB	16	89826901	G	A	-0.0106223	0.00191252	2.80001e-08	0.324117	462166		rs2376885		TRUE	reported	OrO3Oq
WC_UKB	17	1835482	C	T	-0.0212551	0.0024876	1.29987e-17	0.154472	462166		rs4790841		TRUE	reported	OrO3Oq
WC_UKB	17	4040774	C	T	0.0133756	0.00192994	4.19952e-12	0.316036	462166		rs9902846		TRUE	reported	OrO3Oq
WC_UKB	17	7101292	C	T	0.0112249	0.00179579	4.09996e-10	0.456788	462166		rs3826408		TRUE	reported	OrO3Oq
WC_UKB	17	9793240	C	T	0.0105421	0.00190864	3.29997e-08	0.328589	462166		rs17681738		TRUE	reported	OrO3Oq
WC_UKB	17	21268583	C	T	-0.0101458	0.00179655	1.6e-08	0.489933	462166		rs8078135		TRUE	reported	OrO3Oq
WC_UKB	17	28546914	C	T	0.0108469	0.00183573	3.40001e-09	0.394892	462166		rs2020942		TRUE	reported	OrO3Oq
WC_UKB	17	31495076	T	C	0.0101556	0.0018335	2.99999e-08	0.608753	462166		rs319775		TRUE	reported	OrO3Oq
WC_UKB	17	34866546	C	T	-0.0152919	0.00179509	1.59993e-17	0.488298	462166		rs2306593		TRUE	reported	OrO3Oq
WC_UKB	17	42313512	C	G	0.0114738	0.0018902	1.29999e-09	0.34174	462166		rs9916444		TRUE	reported	OrO3Oq
WC_UKB	17	44191483	A	G	-0.0151666	0.00191685	2.49977e-15	0.328129	462166		rs11653367		TRUE	reported	OrO3Oq
WC_UKB	17	46270606	T	C	0.0303242	0.003552	1.39991e-17	0.068322	462166		rs113866544		TRUE	reported	OrO3Oq
WC_UKB	17	52936314	C	T	0.0144325	0.00256295	1.79999e-08	0.143328	462166		rs62072003		TRUE	reported	OrO3Oq
WC_UKB	17	65832016	T	C	0.0224089	0.00225393	2.70023e-23	0.197315	462166		rs7218014		TRUE	reported	OrO3Oq
WC_UKB	17	78757626	A	G	-0.0160848	0.00192604	6.79986e-17	0.317708	462166		rs11150745		TRUE	reported	OrO3Oq
WC_UKB	17	79084367	G	A	-0.0126195	0.00180625	2.80027e-12	0.536793	462166		rs3935190		TRUE	reported	OrO3Oq
WC_UKB	18	1839601	A	T	0.0167802	0.00255407	5.00035e-11	0.145231	462166		rs8097672		TRUE	reported	OrO3Oq
WC_UKB	18	2702259	G	A	0.0111592	0.00202662	3.69999e-08	0.733265	462166		rs2584205		TRUE	reported	OrO3Oq
WC_UKB	18	21090023	A	G	-0.0208198	0.00179299	3.59998e-31	0.494766	462166		rs1788808		TRUE	reported	OrO3Oq
WC_UKB	18	39644247	G	T	0.0107518	0.00184107	5.19996e-09	0.393054	462166		rs559231		TRUE	reported	OrO3Oq
WC_UKB	18	40744790	C	A	-0.0146152	0.00185609	3.40017e-15	0.373194	462166		rs1834144		TRUE	reported	OrO3Oq
WC_UKB	18	53397199	T	C	0.0161785	0.00230615	2.29985e-12	0.812569	462166		rs784257		TRUE	reported	OrO3Oq
WC_UKB	18	57829135	T	C	0.0451644	0.00211824	7.19449e-101	0.232725	462166		rs6567160		TRUE	reported	OrO3Oq
WC_UKB	18	58048295	T	C	-0.0309067	0.00324088	1.50003e-21	0.083822	462166		rs57636386		TRUE	reported	OrO3Oq
WC_UKB	18	63345799	G	A	0.0167972	0.00270011	4.90004e-10	0.12597	462166		rs1942826		TRUE	reported	OrO3Oq
WC_UKB	19	1856554	C	G	0.0132885	0.00180641	1.9002e-13	0.536273	462166		rs11666480		TRUE	reported	OrO3Oq
WC_UKB	19	1970021	C	T	-0.0147612	0.00240193	8e-10	0.168487	462166		rs2074881		TRUE	reported	OrO3Oq
WC_UKB	19	4050424	G	A	-0.0157587	0.00230334	7.8001e-12	0.190131	462166		rs72976986		TRUE	reported	OrO3Oq
WC_UKB	19	18324329	C	T	0.0198329	0.00197713	1.10002e-23	0.288806	462166		rs2302209		TRUE	reported	OrO3Oq
WC_UKB	19	18467322	C	T	-0.0149964	0.00209191	7.59976e-13	0.251127	462166		rs12983532		TRUE	reported	OrO3Oq
WC_UKB	19	18812785	A	G	-0.0159195	0.00183308	3.80014e-18	0.400336	462166		rs8112818		TRUE	reported	OrO3Oq
WC_UKB	19	30272202	G	A	0.01754	0.00191777	5.90065e-20	0.329671	462166		rs12462975		TRUE	reported	OrO3Oq
WC_UKB	19	32946043	A	T	-0.0133061	0.00215663	6.80002e-10	0.221402	462166		rs2903738		TRUE	reported	OrO3Oq
WC_UKB	19	33890838	C	G	0.0103615	0.00179628	8e-09	0.478735	462166		rs10406327		TRUE	reported	OrO3Oq
WC_UKB	19	45411941	T	C	-0.0271422	0.00248126	7.50067e-28	0.154146	462166		rs429358		TRUE	reported	OrO3Oq
WC_UKB	19	46182304	T	A	-0.0265551	0.00225944	6.79986e-32	0.194353	462166		rs10423928		TRUE	reported	OrO3Oq
WC_UKB	19	47562509	T	C	0.0153811	0.00184133	6.59933e-17	0.596078	462166		rs7259070		TRUE	reported	OrO3Oq
WC_UKB	20	17091233	A	G	-0.0115951	0.00209164	2.99999e-08	0.758579	462166		rs852042		TRUE	reported	OrO3Oq
WC_UKB	20	25190777	C	T	0.0134001	0.0019003	1.80011e-12	0.333423	462166		rs4456769		TRUE	reported	OrO3Oq
WC_UKB	20	41986507	T	C	-0.0176808	0.00270327	6.09958e-11	0.126588	462166		rs6030803		TRUE	reported	OrO3Oq
WC_UKB	20	51195932	C	T	-0.0241942	0.00228107	2.80027e-26	0.192309	462166		rs73142879		TRUE	reported	OrO3Oq
WC_UKB	20	53503198	C	A	-0.011125	0.00202001	3.59998e-08	0.731389	462166		rs6069037		TRUE	reported	OrO3Oq
WC_UKB	20	62370349	T	C	0.0127063	0.00191349	3.10027e-11	0.675421	462166		rs1056441		TRUE	reported	OrO3Oq
WC_UKB	21	40309436	C	G	-0.0139009	0.00185438	6.59933e-14	0.37702	462166		rs13047416		TRUE	reported	OrO3Oq
WC_UKB	21	46488959	G	A	-0.0294934	0.00399143	1.50003e-13	0.053933	462166		rs76040172		TRUE	reported	OrO3Oq
WC_UKB	22	18130209	C	T	0.0133307	0.00226433	3.89996e-09	0.196347	462166		rs11704728		TRUE	reported	OrO3Oq
WC_UKB	22	19948863	G	C	0.0103041	0.00180539	1.09999e-08	0.517356	462166		rs165656		TRUE	reported	OrO3Oq
WC_UKB	22	40712637	G	A	-0.010579	0.00189657	2.39999e-08	0.339906	462166		rs6001877		TRUE	reported	OrO3Oq
WC_UKB	22	41804716	G	A	-0.0124131	0.00198899	4.39997e-10	0.29035	462166		rs28489620		TRUE	reported	OrO3Oq
GIANT_2015_WC	1	49438005	G	A	-0.023	0.0035	1.6e-10	0.6333	231815		rs3127553		TRUE	reported	TBRyY5
GIANT_2015_WC	1	72837239	T	C	0.027	0.0035	1.50003e-14	0.6083	231912		rs7531118		TRUE	reported	TBRyY5
GIANT_2015_WC	1	78048331	T	C	0.022	0.0035	4.20001e-10	0.425	232022		rs17381664		TRUE	reported	TBRyY5
GIANT_2015_WC	1	96893000	G	A	0.02	0.0034	5.19996e-09	0.4833	232057		rs11165623		TRUE	reported	TBRyY5
GIANT_2015_WC	1	110082886	C	T	0.058	0.0098	3.40001e-09	0.0339	212149		rs7550711		TRUE	reported	TBRyY5
GIANT_2015_WC	1	177852580	T	C	0.043	0.0043	3.29989e-23	0.2667	218883		rs633715		TRUE	reported	TBRyY5
GIANT_2015_WC	1	201784287	A	C	0.019	0.0034	2.39999e-08	0.5083	231899		rs2820292		TRUE	reported	TBRyY5
GIANT_2015_WC	2	635721	T	C	0.051	0.0045	1.99986e-30	0.875	231849		rs6755502		TRUE	reported	TBRyY5
GIANT_2015_WC	2	58792377	A	G	-0.021	0.0034	1.2e-09	0.3833	231976		rs929641		TRUE	reported	TBRyY5
GIANT_2015_WC	2	59307725	G	A	-0.022	0.0035	1.89998e-10	0.625	232046		rs6545714		TRUE	reported	TBRyY5
GIANT_2015_WC	3	81792112	C	A	0.021	0.0038	2.19999e-08	0.3667	196103		rs3849570		TRUE	reported	TBRyY5
GIANT_2015_WC	3	85819412	A	C	-0.023	0.0035	2.09991e-11	0.4083	232048		rs2325036		TRUE	reported	TBRyY5
GIANT_2015_WC	3	141094209	G	A	0.021	0.0034	2.90001e-10	0.4833	231985		rs6440003		TRUE	reported	TBRyY5
GIANT_2015_WC	3	185824004	T	C	0.031	0.0051	1.7e-09	0.9083	230610		rs1516725		TRUE	reported	TBRyY5
GIANT_2015_WC	4	45182527	A	G	0.032	0.0035	6.09958e-20	0.4333	231679		rs10938397		TRUE	reported	TBRyY5
GIANT_2015_WC	5	75015242	T	G	-0.025	0.0035	3.19963e-13	0.375	232028		rs2112347		TRUE	reported	TBRyY5
GIANT_2015_WC	6	26200677	A	G	-0.022	0.0037	2.1e-09	0.275	225694		rs806794		TRUE	reported	TBRyY5
GIANT_2015_WC	6	34825662	T	C	0.026	0.0048	3.40001e-08	0.1	230687		rs16894959		TRUE	reported	TBRyY5
GIANT_2015_WC	6	50865820	C	T	0.039	0.0044	7.19946e-19	0.1	232080		rs943005		TRUE	reported	TBRyY5
GIANT_2015_WC	6	108977663	T	C	0.024	0.0036	1.9002e-11	0.7	232015		rs9400239		TRUE	reported	TBRyY5
GIANT_2015_WC	6	127455821	A	C	0.019	0.0034	3.40001e-08	0.5583	231857		rs2489623		TRUE	reported	TBRyY5
GIANT_2015_WC	9	28414339	A	G	0.025	0.0036	1.20005e-11	0.2917	232050		rs10968576		TRUE	reported	TBRyY5
GIANT_2015_WC	10	104596924	C	A	0.019	0.0035	3.69999e-08	0.3917	225708		rs6163		TRUE	reported	TBRyY5
GIANT_2015_WC	10	114758349	C	T	-0.022	0.0037	3.89996e-09	0.25	232078		rs7903146		TRUE	reported	TBRyY5
GIANT_2015_WC	11	8669437	A	G	0.02	0.0035	5.39995e-09	0.725	232029		rs10840100		TRUE	reported	TBRyY5
GIANT_2015_WC	11	27672252	C	G	-0.031	0.0037	3.29989e-17	0.6417	225754		rs10767658		TRUE	reported	TBRyY5
GIANT_2015_WC	11	47434986	G	A	-0.022	0.0036	9.40005e-10	0.3667	226024		rs2293576		TRUE	reported	TBRyY5
GIANT_2015_WC	12	50247468	G	A	0.028	0.0035	1.59993e-15	0.4417	232059		rs7138803		TRUE	reported	TBRyY5
GIANT_2015_WC	13	54102206	G	A	0.031	0.0052	2.5e-09	0.1	222998		rs12429545		TRUE	reported	TBRyY5
GIANT_2015_WC	14	25928179	C	A	-0.022	0.0037	2.19999e-09	0.3333	231985		rs10132280		TRUE	reported	TBRyY5
GIANT_2015_WC	14	79940383	G	T	0.033	0.0041	9.3994e-16	0.275	232007		rs7144011		TRUE	reported	TBRyY5
GIANT_2015_WC	15	68080886	A	T	-0.02	0.0035	2.30001e-08	0.3417	230989		rs4776970		TRUE	reported	TBRyY5
GIANT_2015_WC	16	4021734	A	G	0.028	0.0048	2.99999e-09	0.8333	232034		rs2531992		TRUE	reported	TBRyY5
GIANT_2015_WC	16	28883241	A	G	0.034	0.0035	1.39991e-22	0.3583	230193		rs7498665		TRUE	reported	TBRyY5
GIANT_2015_WC	16	31088347	G	A	-0.019	0.0035	3.2e-08	0.375	232060		rs749671		TRUE	reported	TBRyY5
GIANT_2015_WC	16	53803574	T	A	0.074	0.0035	3.69828e-101	0.45	230183		rs1558902		TRUE	reported	TBRyY5
GIANT_2015_WC	18	40147671	G	A	-0.021	0.0035	2.30001e-09	0.6833	231731		rs7239883		TRUE	reported	TBRyY5
GIANT_2015_WC	18	57829135	T	C	0.048	0.004	2.60016e-33	0.2833	231894		rs6567160		TRUE	reported	TBRyY5
GIANT_2015_WC	18	58049656	T	C	-0.037	0.006	8.99995e-10	0.1333	230221		rs17066856		TRUE	reported	TBRyY5
GIANT_2015_WC	19	46202172	C	T	-0.035	0.0046	1.69981e-14	0.15	217525		rs2287019		TRUE	reported	TBRyY5
GIANT_2015_WC	20	50981945	T	C	-0.023	0.0037	1.5e-09	0.3	231903		rs16996700		TRUE	reported	TBRyY5
Nikpay_CAD	1	56965664	C	T	-0.12575	0.016695	5.00035e-14	0.084903	184305		rs9970807		TRUE	reported	3Vw8hR
Nikpay_CAD	1	109817192	A	G	-0.11453	0.011482	1.97015e-23	0.21418	184305		rs7528419		TRUE	reported	3Vw8hR
Nikpay_CAD	1	154395946	A	G	-0.056012	0.0094061	2.59998e-09	0.552455	184305		rs6689306		TRUE	reported	3Vw8hR
Nikpay_CAD	1	222823743	T	G	0.078807	0.0110551	1.00995e-12	0.663052	184305		rs67180937		TRUE	reported	3Vw8hR
Nikpay_CAD	2	19942473	G	A	0.08516	0.0150265	1.45001e-08	0.104706	184305		rs16986953		TRUE	reported	3Vw8hR
Nikpay_CAD	2	21286057	T	C	0.067499	0.0121924	3.09001e-08	0.791985	184305		rs515135		TRUE	reported	3Vw8hR
Nikpay_CAD	2	85788175	T	A	0.059618	0.0095093	3.62001e-10	0.448518	184305		rs7568458		TRUE	reported	3Vw8hR
Nikpay_CAD	2	145286559	T	G	0.098786	0.0166548	2.99999e-09	0.087681	184305		rs17678683		TRUE	reported	3Vw8hR
Nikpay_CAD	2	203893999	C	A	0.137846	0.0158314	3.12033e-18	0.106962	184305		rs115654617		TRUE	reported	3Vw8hR
Nikpay_CAD	3	138087467	A	C	0.073596	0.0124987	3.89996e-09	0.161866	184305		rs1199338		TRUE	reported	3Vw8hR
Nikpay_CAD	4	57838583	G	T	0.060764	0.0111159	4.58997e-08	0.214637	184305		rs17087335		TRUE	reported	3Vw8hR
Nikpay_CAD	4	148281001	C	G	-0.07083	0.0115558	8.82003e-10	0.204651	184305		rs4593108		TRUE	reported	3Vw8hR
Nikpay_CAD	6	12903957	A	G	0.131836	0.0096527	1.81009e-42	0.431606	184305		rs9349379		TRUE	reported	3Vw8hR
Nikpay_CAD	6	39134099	T	C	-0.066813	0.0118763	1.84999e-08	0.192738	184305		rs56336142		TRUE	reported	3Vw8hR
Nikpay_CAD	6	134173151	A	G	-0.066813	0.0099612	1.98016e-11	0.300047	184305		rs12202017		TRUE	reported	3Vw8hR
Nikpay_CAD	6	160687412	T	G	0.246627	0.0308579	1.33015e-15	0.027558	184305		rs10080815		TRUE	reported	3Vw8hR
Nikpay_CAD	6	161005610	C	T	0.316641	0.0242403	5.39014e-39	0.056243	184305		rs55730499		TRUE	reported	3Vw8hR
Nikpay_CAD	7	19049388	G	A	0.073415	0.0112951	8.05008e-11	0.20047	184305		rs2107595		TRUE	reported	3Vw8hR
Nikpay_CAD	7	129663496	C	T	-0.072569	0.0110605	5.33949e-11	0.313325	184305		rs11556924		TRUE	reported	3Vw8hR
Nikpay_CAD	7	150690176	C	T	0.133315	0.0221275	1.69001e-09	0.064515	184305		rs3918226		TRUE	reported	3Vw8hR
Nikpay_CAD	9	22098619	A	G	0.193401	0.0091877	2.28981e-98	0.488668	184305		rs2891168		TRUE	reported	3Vw8hR
Nikpay_CAD	9	136141870	C	T	0.079704	0.0117524	1.18987e-11	0.190872	184305		rs2519093		TRUE	reported	3Vw8hR
Nikpay_CAD	10	30323892	G	A	0.062633	0.0095049	4.40961e-11	0.418221	184305		rs2487928		TRUE	reported	3Vw8hR
Nikpay_CAD	10	44480811	T	G	0.075878	0.0097113	5.55009e-15	0.637485	184305		rs1870634		TRUE	reported	3Vw8hR
Nikpay_CAD	10	91002927	C	T	0.066812	0.0096809	5.14991e-12	0.369131	184305		rs1412444		TRUE	reported	3Vw8hR
Nikpay_CAD	10	104604916	T	G	-0.079249	0.0135252	4.64997e-09	0.12747	184305		rs11191416		TRUE	reported	3Vw8hR
Nikpay_CAD	11	9751196	G	A	0.054714	0.009619	1.28e-08	0.549821	184305		rs10840293		TRUE	reported	3Vw8hR
Nikpay_CAD	11	103673277	A	C	-0.065565	0.0100568	7.05018e-11	0.676464	184305		rs2128739		TRUE	reported	3Vw8hR
Nikpay_CAD	12	90008959	A	G	0.074114	0.0113331	6.17021e-11	0.201306	184305		rs2681472		TRUE	reported	3Vw8hR
Nikpay_CAD	12	112059557	C	T	0.068556	0.0107672	1.93001e-10	0.365499	184305		rs11065979		TRUE	reported	3Vw8hR
Nikpay_CAD	13	111040681	G	A	0.068566	0.0107552	1.83e-10	0.263277	184305		rs11838776		TRUE	reported	3Vw8hR
Nikpay_CAD	14	100145710	C	G	0.05538	0.0097569	1.38e-08	0.423033	184305		rs10139550		TRUE	reported	3Vw8hR
Nikpay_CAD	15	67455630	C	T	-0.069743	0.0118937	4.52002e-09	0.205729	184305		rs56062135		TRUE	reported	3Vw8hR
Nikpay_CAD	15	79124475	T	C	0.077234	0.0095277	4.44017e-16	0.585831	184305		rs4468572		TRUE	reported	3Vw8hR
Nikpay_CAD	15	89574218	G	A	-0.096711	0.0175662	3.68002e-08	0.097718	184305		rs8042271		TRUE	reported	3Vw8hR
Nikpay_CAD	17	59013488	T	C	0.079961	0.0142216	1.88001e-08	0.146516	184305		rs7212798		TRUE	reported	3Vw8hR
Nikpay_CAD	18	57838401	G	A	0.058163	0.0105173	3.2e-08	0.256835	184305		rs663129		TRUE	reported	3Vw8hR
Nikpay_CAD	19	11188247	G	A	-0.13361	0.0170415	4.44017e-15	0.100378	184305		rs56289821		TRUE	reported	3Vw8hR
Nikpay_CAD	19	45422946	A	G	0.091906	0.0140977	7.06968e-11	0.166036	184305		rs4420638		TRUE	reported	3Vw8hR
Nikpay_CAD	21	35593827	G	A	0.127571	0.015952	1.33015e-15	0.121186	184305		rs28451064		TRUE	reported	3Vw8hR
Nikpay_CAD	22	24658858	G	T	-0.180923	0.0283062	1.63999e-10	0.029268	184305		rs180803		TRUE	reported	3Vw8hR
GIANT_2015_BMI	1	49589847	A	G	-0.0227	0.0031	5.48151e-13	0.5833	313651		rs657452		TRUE	reported	8HNMEI
GIANT_2015_BMI	1	72751185	T	C	0.0334	0.0031	2.66073e-26	0.6491	316872		rs3101336		TRUE	reported	8HNMEI
GIANT_2015_BMI	1	75005776	A	G	0.0217	0.0031	3.82913e-12	0.3833	321410		rs6656785		TRUE	reported	8HNMEI
GIANT_2015_BMI	1	96924097	C	T	0.0218	0.0031	2.07014e-12	0.575	320730		rs11165643		TRUE	reported	8HNMEI
GIANT_2015_BMI	1	110154688	T	C	0.0658	0.0088	7.0291e-14	0.04167	297874		rs17024393		TRUE	reported	8HNMEI
GIANT_2015_BMI	1	177889480	A	G	0.0482	0.0039	2.61818e-35	0.2667	322008		rs543874		TRUE	reported	8HNMEI
GIANT_2015_BMI	1	201784287	A	C	0.0195	0.0031	1.834e-10	0.5083	321707		rs2820292		TRUE	reported	8HNMEI
GIANT_2015_BMI	2	632348	A	G	0.0601	0.004	1.11301e-50	0.875	318287		rs13021737		TRUE	reported	8HNMEI
GIANT_2015_BMI	2	25150296	A	G	0.0307	0.0031	8.77607e-24	0.5	321759		rs10182181		TRUE	reported	8HNMEI
GIANT_2015_BMI	2	58975143	T	C	0.0212	0.0037	1.006e-08	0.5	233833		rs12986742		TRUE	reported	8HNMEI
GIANT_2015_BMI	2	59305625	T	C	-0.0229	0.0034	2.2532e-11	0.675	321969		rs1016287		TRUE	reported	8HNMEI
GIANT_2015_BMI	2	143043285	C	T	0.0245	0.0044	2.31302e-08	0.1167	322065		rs2121279		TRUE	reported	8HNMEI
GIANT_2015_BMI	2	181550962	C	T	0.0178	0.0031	1.196e-08	0.5833	321924		rs1528435		TRUE	reported	8HNMEI
GIANT_2015_BMI	2	213413231	G	A	-0.022	0.0034	1.17301e-10	0.2917	322024		rs7599312		TRUE	reported	8HNMEI
GIANT_2015_BMI	3	25106437	A	G	0.0185	0.0031	2.476e-09	0.575	321463		rs6804842		TRUE	reported	8HNMEI
GIANT_2015_BMI	3	61236462	C	T	-0.02	0.0031	1.629e-10	0.3417	316768		rs2365389		TRUE	reported	8HNMEI
GIANT_2015_BMI	3	81792112	C	A	0.0188	0.0034	2.601e-08	0.3667	284339		rs3849570		TRUE	reported	8HNMEI
GIANT_2015_BMI	3	85807590	T	G	0.0297	0.0039	1.737e-14	0.1833	322135		rs13078960		TRUE	reported	8HNMEI
GIANT_2015_BMI	3	141275436	G	T	0.0483	0.0077	3.54797e-10	0.0917	233929		rs16851483		TRUE	reported	8HNMEI
GIANT_2015_BMI	3	185824004	T	C	0.0451	0.0046	1.88582e-22	0.9083	320644		rs1516725		TRUE	reported	8HNMEI
GIANT_2015_BMI	4	45182527	A	G	0.0402	0.0031	3.20479e-38	0.4333	320955		rs10938397		TRUE	reported	8HNMEI
GIANT_2015_BMI	4	77129568	C	G	0.0306	0.0053	7.75997e-09	0.1583	233722		rs17001654		TRUE	reported	8HNMEI
GIANT_2015_BMI	4	103188709	C	T	0.0477	0.0068	1.82516e-12	0.1167	321461		rs13107325		TRUE	reported	8HNMEI
GIANT_2015_BMI	4	145659064	T	C	-0.0358	0.0064	2.55e-08	0.075	296401		rs11727676		TRUE	reported	8HNMEI
GIANT_2015_BMI	5	75015242	T	G	-0.0261	0.0031	6.19156e-17	0.375	322019		rs2112347		TRUE	reported	8HNMEI
GIANT_2015_BMI	6	34563164	A	G	0.0221	0.0035	1.75299e-10	0.2667	315542		rs205262		TRUE	reported	8HNMEI
GIANT_2015_BMI	6	50845490	A	G	0.0447	0.004	4.12572e-29	0.1	322019		rs2207139		TRUE	reported	8HNMEI
GIANT_2015_BMI	6	108977663	T	C	0.0188	0.0033	1.61298e-08	0.7	321988		rs9400239		TRUE	reported	8HNMEI
GIANT_2015_BMI	6	163033350	A	G	-0.0277	0.0048	7.33905e-09	0.2	321902		rs13191362		TRUE	reported	8HNMEI
GIANT_2015_BMI	7	75163169	A	G	0.0202	0.0033	6.33301e-10	0.5417	306238		rs1167827		TRUE	reported	8HNMEI
GIANT_2015_BMI	7	76608143	C	T	-0.0317	0.0057	3.18698e-08	0.7583	205675		rs2245368		TRUE	reported	8HNMEI
GIANT_2015_BMI	8	76806584	T	C	-0.0224	0.0033	2.07014e-11	0.3667	322085		rs17405819		TRUE	reported	8HNMEI
GIANT_2015_BMI	8	85079709	T	C	0.0192	0.0035	4.889e-08	0.7583	321406		rs2033732		TRUE	reported	8HNMEI
GIANT_2015_BMI	9	15634326	T	C	-0.0179	0.0031	4.56405e-09	0.4667	321887		rs4740619		TRUE	reported	8HNMEI
GIANT_2015_BMI	9	28414339	A	G	0.0249	0.0033	6.60693e-14	0.2917	322061		rs10968576		TRUE	reported	8HNMEI
GIANT_2015_BMI	9	111932342	C	T	-0.0174	0.0031	2.67301e-08	0.6417	322048		rs6477694		TRUE	reported	8HNMEI
GIANT_2015_BMI	9	120378483	T	C	-0.0188	0.0031	7.91006e-10	0.425	321979		rs1928295		TRUE	reported	8HNMEI
GIANT_2015_BMI	9	129460914	A	G	-0.0174	0.0031	1.83e-08	0.575	320727		rs10733682		TRUE	reported	8HNMEI
GIANT_2015_BMI	10	87410904	A	G	0.0395	0.0071	2.95999e-08	0.05	321770		rs7899106		TRUE	reported	8HNMEI
GIANT_2015_BMI	10	102395440	T	C	0.0249	0.0038	5.94155e-11	0.2083	321770		rs17094222		TRUE	reported	8HNMEI
GIANT_2015_BMI	10	114758349	C	T	-0.0234	0.0034	1.11199e-11	0.25	322130		rs7903146		TRUE	reported	8HNMEI
GIANT_2015_BMI	11	8673939	C	G	0.0209	0.0031	2.90001e-11	0.725	320028		rs4256980		TRUE	reported	8HNMEI
GIANT_2015_BMI	11	27684517	A	G	-0.0414	0.0038	5.55648e-28	0.2	322103		rs11030104		TRUE	reported	8HNMEI
GIANT_2015_BMI	11	43864278	T	C	-0.0198	0.0036	2.97098e-08	0.8	316848		rs2176598		TRUE	reported	8HNMEI
GIANT_2015_BMI	11	47650993	C	T	0.0262	0.0031	5.14517e-17	0.45	321959		rs3817334		TRUE	reported	8HNMEI
GIANT_2015_BMI	11	115022404	A	G	0.0217	0.0031	1.31009e-12	0.4333	321903		rs12286929		TRUE	reported	8HNMEI
GIANT_2015_BMI	12	50247468	G	A	0.0315	0.0031	8.15267e-24	0.4417	322092		rs7138803		TRUE	reported	8HNMEI
GIANT_2015_BMI	12	122781897	G	A	-0.0307	0.0055	2.01902e-08	0.0917	314111		rs11057405		TRUE	reported	8HNMEI
GIANT_2015_BMI	13	28017270	G	C	0.0295	0.0047	3.46099e-10	0.2333	233807		rs9579083		TRUE	reported	8HNMEI
GIANT_2015_BMI	13	54102206	G	A	0.0334	0.0047	1.09396e-12	0.1	312934		rs12429545		TRUE	reported	8HNMEI
GIANT_2015_BMI	14	25928179	C	A	-0.023	0.0034	1.14104e-11	0.3333	321797		rs10132280		TRUE	reported	8HNMEI
GIANT_2015_BMI	14	79899454	C	T	0.0235	0.0031	1.22999e-14	0.6167	321970		rs7141420		TRUE	reported	8HNMEI
GIANT_2015_BMI	15	51748610	A	G	-0.0176	0.0031	7.41208e-09	0.575	321398		rs3736485		TRUE	reported	8HNMEI
GIANT_2015_BMI	15	68077168	T	C	-0.0311	0.0037	1.91117e-17	0.225	322098		rs16951275		TRUE	reported	8HNMEI
GIANT_2015_BMI	16	3627358	C	T	0.0225	0.0037	7.47309e-10	0.2667	308688		rs758747		TRUE	reported	8HNMEI
GIANT_2015_BMI	16	4015729	C	T	0.0244	0.004	1.06101e-09	0.5917	233835		rs879620		TRUE	reported	8HNMEI
GIANT_2015_BMI	16	19941968	T	C	-0.0265	0.0042	1.84901e-10	0.2083	316274		rs9926784		TRUE	reported	8HNMEI
GIANT_2015_BMI	16	28889486	C	A	0.0309	0.0031	3.13979e-23	0.3583	321930		rs3888190		TRUE	reported	8HNMEI
GIANT_2015_BMI	16	31075175	G	A	-0.0184	0.0031	3.67401e-09	0.375	322046		rs2303223		TRUE	reported	8HNMEI
GIANT_2015_BMI	16	53803574	T	A	0.0818	0.0031	7.51623e-153	0.45	320073		rs1558902		TRUE	reported	8HNMEI
GIANT_2015_BMI	17	5283252	A	G	0.0192	0.0034	1.28399e-08	0.225	321836		rs1000940		TRUE	reported	8HNMEI
GIANT_2015_BMI	17	78615571	G	A	-0.0182	0.0031	2.49402e-09	0.4583	322032		rs12940622		TRUE	reported	8HNMEI
GIANT_2015_BMI	18	21104888	C	T	-0.0167	0.0031	4.16898e-08	0.475	322032		rs1808579		TRUE	reported	8HNMEI
GIANT_2015_BMI	18	57829135	T	C	0.0556	0.0036	3.93007e-53	0.2833	321958		rs6567160		TRUE	reported	8HNMEI
GIANT_2015_BMI	18	58049656	T	C	-0.0395	0.0055	6.22444e-13	0.1333	319773		rs17066856		TRUE	reported	8HNMEI
GIANT_2015_BMI	19	18454825	A	G	-0.0194	0.0035	3.41499e-08	0.3083	319588		rs17724992		TRUE	reported	8HNMEI
GIANT_2015_BMI	19	34309532	A	G	0.0182	0.0033	2.40702e-08	0.6667	321970		rs29941		TRUE	reported	8HNMEI
GIANT_2015_BMI	19	46202172	C	T	-0.036	0.0042	4.58458e-18	0.15	300921		rs2287019		TRUE	reported	8HNMEI
van_der_Harst_CAD	1	2252205	C	T	0.0469	0.0082	1.32599e-08	0.1483	547261	122733	rs36096196	424528	TRUE	reported	bc9W8F
van_der_Harst_CAD	1	2920158	C	T	-0.0496	0.009	3.65098e-08	0.1141	547261	122733	rs16823332	424528	TRUE	reported	bc9W8F
van_der_Harst_CAD	1	3325912	C	A	0.0514	0.0084	9.97401e-10	0.1355	547261	122733	rs2493298	424528	TRUE	reported	bc9W8F
van_der_Harst_CAD	1	38456106	G	A	-0.0326	0.0052	4.12895e-10	0.4303	547261	122733	rs4072980	424528	TRUE	reported	bc9W8F
van_der_Harst_CAD	1	55505647	G	T	-0.2406	0.0247	1.85481e-22	0.0164	547261	122733	rs11591147	424528	TRUE	reported	bc9W8F
van_der_Harst_CAD	1	56966350	A	G	-0.096	0.0088	8.03711e-28	0.0938	547261	122733	rs17114046	424528	TRUE	reported	bc9W8F
van_der_Harst_CAD	1	109821511	T	G	0.0999	0.0062	3.63413e-58	0.7657	547261	122733	rs602633	424528	TRUE	reported	bc9W8F
van_der_Harst_CAD	1	115899071	A	G	-0.0365	0.0065	2.01502e-08	0.1855	547261	122733	rs10858079	424528	TRUE	reported	bc9W8F
van_der_Harst_CAD	1	150932696	T	A	0.057	0.0094	1.286e-09	0.108	547261	122733	rs12143614	424528	TRUE	reported	bc9W8F
van_der_Harst_CAD	1	154422067	T	C	-0.0395	0.0051	6.69268e-15	0.5662	547261	122733	rs4845625	424528	TRUE	reported	bc9W8F
van_der_Harst_CAD	1	169094459	C	T	-0.0362	0.0052	3.13834e-12	0.4956	547261	122733	rs1892094	424528	TRUE	reported	bc9W8F
van_der_Harst_CAD	1	200646073	C	T	-0.0284	0.005	1.76901e-08	0.4715	547261	122733	rs6700559	424528	TRUE	reported	bc9W8F
van_der_Harst_CAD	1	201872264	C	T	0.0359	0.0056	1.09701e-10	0.3012	547261	122733	rs2820315	424528	TRUE	reported	bc9W8F
van_der_Harst_CAD	1	222829550	G	A	0.0699	0.0064	5.90473e-28	0.6821	547261	122733	rs35158675	424528	TRUE	reported	bc9W8F
van_der_Harst_CAD	2	19942473	G	A	0.0812	0.0098	1.0639e-16	0.1095	547261	122733	rs16986953	424528	TRUE	reported	bc9W8F
van_der_Harst_CAD	2	21286057	T	C	0.0555	0.0066	5.73984e-17	0.8163	547261	122733	rs515135	424528	TRUE	reported	bc9W8F
van_der_Harst_CAD	2	44073881	T	C	-0.0492	0.0056	1.83781e-18	0.6962	547261	122733	rs6544713	424528	TRUE	reported	bc9W8F
van_der_Harst_CAD	2	45896437	C	A	0.0332	0.0058	7.63502e-09	0.5251	547261	122733	rs582384	424528	TRUE	reported	bc9W8F
van_der_Harst_CAD	2	85763520	C	T	0.0565	0.0057	1.81301e-23	0.465	547261	122733	rs6743030	424528	TRUE	reported	bc9W8F
van_der_Harst_CAD	2	145801461	T	C	0.0368	0.0051	5.40754e-13	0.4701	547261	122733	rs2252641	424528	TRUE	reported	bc9W8F
van_der_Harst_CAD	2	164957251	A	G	-0.0482	0.0074	6.30667e-11	0.1811	547261	122733	rs12999907	424528	TRUE	reported	bc9W8F
van_der_Harst_CAD	2	203873743	G	A	0.1054	0.0089	1.29092e-32	0.1174	547261	122733	rs6728861	424528	TRUE	reported	bc9W8F
van_der_Harst_CAD	2	216304384	T	C	-0.0435	0.0059	1.57616e-13	0.7278	547261	122733	rs1250229	424528	TRUE	reported	bc9W8F
van_der_Harst_CAD	2	218683154	A	G	-0.037	0.0052	1.55489e-12	0.6105	547261	122733	rs2571445	424528	TRUE	reported	bc9W8F
van_der_Harst_CAD	2	238223955	G	A	-0.0339	0.0061	2.64101e-08	0.3157	547261	122733	rs11677932	424528	TRUE	reported	bc9W8F
van_der_Harst_CAD	3	14926351	T	C	-0.0379	0.0057	3.20701e-11	0.5656	547261	122733	rs34991912	424528	TRUE	reported	bc9W8F
van_der_Harst_CAD	3	48193515	C	T	0.0355	0.0054	3.48017e-11	0.6693	547261	122733	rs7617773	424528	TRUE	reported	bc9W8F
van_der_Harst_CAD	3	49832788	G	A	-0.0505	0.009	1.81301e-08	0.1179	547261	122733	rs73079003	424528	TRUE	reported	bc9W8F
van_der_Harst_CAD	3	124450081	G	C	0.0639	0.0083	1.44911e-14	0.1284	547261	122733	rs4678145	424528	TRUE	reported	bc9W8F
van_der_Harst_CAD	3	132257961	G	T	-0.0431	0.0073	2.99902e-09	0.1433	547261	122733	rs10512861	424528	TRUE	reported	bc9W8F
van_der_Harst_CAD	3	136272246	T	C	0.0454	0.0059	1.28204e-14	0.7526	547261	122733	rs7621025	424528	TRUE	reported	bc9W8F
van_der_Harst_CAD	3	138092889	C	T	0.0644	0.0076	2.40326e-17	0.1625	547261	122733	rs185244	424528	TRUE	reported	bc9W8F
van_der_Harst_CAD	3	154057741	C	G	0.0642	0.0081	3.36434e-15	0.8351	547261	122733	rs789294	424528	TRUE	reported	bc9W8F
van_der_Harst_CAD	3	156852141	C	T	0.0342	0.0061	1.81001e-08	0.3261	547261	122733	rs4368453	424528	TRUE	reported	bc9W8F
van_der_Harst_CAD	3	172115902	G	A	-0.0358	0.0059	1.21099e-09	0.5914	547261	122733	rs12897	424528	TRUE	reported	bc9W8F
van_der_Harst_CAD	4	57822869	T	A	0.0399	0.007	1.16899e-08	0.1979	547261	122733	rs17081933	424528	TRUE	reported	bc9W8F
van_der_Harst_CAD	4	77416627	A	G	-0.0336	0.0053	1.637e-10	0.6435	547261	122733	rs12500824	424528	TRUE	reported	bc9W8F
van_der_Harst_CAD	4	81181072	A	T	0.0491	0.0064	1.36899e-14	0.2792	547261	122733	rs10857147	424528	TRUE	reported	bc9W8F
van_der_Harst_CAD	4	96117371	A	T	-0.0386	0.0067	7.63203e-09	0.7659	547261	122733	rs3775058	424528	TRUE	reported	bc9W8F
van_der_Harst_CAD	4	120909501	A	C	0.0486	0.0063	1.22914e-14	0.2834	547261	122733	rs7678555	424528	TRUE	reported	bc9W8F
van_der_Harst_CAD	4	148401190	G	A	0.0751	0.0074	5.17726e-24	0.1559	547261	122733	rs6841581	424528	TRUE	reported	bc9W8F
van_der_Harst_CAD	4	156432368	A	C	-0.0549	0.0085	1.00201e-10	0.8664	547261	122733	rs2880099	424528	TRUE	reported	bc9W8F
van_der_Harst_CAD	4	156635309	G	A	-0.0643	0.0065	3.33734e-23	0.1892	547261	122733	rs7692387	424528	TRUE	reported	bc9W8F
van_der_Harst_CAD	4	169687725	T	G	-0.0311	0.0056	3.092e-08	0.4902	547261	122733	rs7696431	424528	TRUE	reported	bc9W8F
van_der_Harst_CAD	5	9546098	A	G	-0.0615	0.0085	3.75232e-13	0.1324	547261	122733	rs112941079	424528	TRUE	reported	bc9W8F
van_der_Harst_CAD	5	55860781	A	G	0.0366	0.0067	3.73697e-08	0.177	547261	122733	rs3936511	424528	TRUE	reported	bc9W8F
van_der_Harst_CAD	5	131667353	A	G	0.0488	0.0078	4.741e-10	0.1246	547261	122733	rs273909	424528	TRUE	reported	bc9W8F
van_der_Harst_CAD	5	142516897	C	T	0.043	0.0051	6.52529e-17	0.4633	547261	122733	rs246600	424528	TRUE	reported	bc9W8F
van_der_Harst_CAD	6	12903957	A	G	0.1072	0.0058	2.71769e-76	0.4093	547261	122733	rs9349379	424528	TRUE	reported	bc9W8F
van_der_Harst_CAD	6	22612629	G	A	0.0442	0.0059	5.70821e-14	0.3545	547261	122733	rs6909752	424528	TRUE	reported	bc9W8F
van_der_Harst_CAD	6	31325745	T	C	0.0333	0.0061	4.20698e-08	0.559	547261	122733	rs74618856	424528	TRUE	reported	bc9W8F
van_der_Harst_CAD	6	34552797	G	A	0.0479	0.0072	2.1508e-11	0.1554	547261	122733	rs2814944	424528	TRUE	reported	bc9W8F
van_der_Harst_CAD	6	36638636	G	A	0.028	0.0051	3.48401e-08	0.4907	547261	122733	rs1321309	424528	TRUE	reported	bc9W8F
van_der_Harst_CAD	6	39171862	C	T	0.0399	0.0059	9.31108e-12	0.2503	547261	122733	rs733701	424528	TRUE	reported	bc9W8F
van_der_Harst_CAD	6	43758873	G	A	0.0386	0.0056	3.99485e-12	0.5807	547261	122733	rs6905288	424528	TRUE	reported	bc9W8F
van_der_Harst_CAD	6	57148171	C	T	0.0829	0.0114	3.24265e-13	0.0662	547261	122733	rs71566846	424528	TRUE	reported	bc9W8F
van_der_Harst_CAD	6	82612271	A	C	-0.0319	0.0052	6.584e-10	0.4686	547261	122733	rs4613862	424528	TRUE	reported	bc9W8F
van_der_Harst_CAD	6	126717064	A	G	-0.037	0.0058	1.17401e-10	0.5073	547261	122733	rs1591805	424528	TRUE	reported	bc9W8F
van_der_Harst_CAD	6	134110535	G	C	0.0458	0.0081	1.93602e-08	0.1407	547261	122733	rs17478367	424528	TRUE	reported	bc9W8F
van_der_Harst_CAD	6	134209837	T	C	-0.0655	0.0056	3.55468e-31	0.305	547261	122733	rs2327429	424528	TRUE	reported	bc9W8F
van_der_Harst_CAD	6	150997401	C	T	-0.0537	0.0092	6.08695e-09	0.0839	547261	122733	rs17080091	424528	TRUE	reported	bc9W8F
van_der_Harst_CAD	6	160578069	G	T	0.1843	0.0256	6.73752e-13	0.013	547261	122733	rs146534110	424528	TRUE	reported	bc9W8F
van_der_Harst_CAD	6	160922870	A	G	0.4286	0.0242	6.12491e-70	0.019	547261	122733	rs117733303	424528	TRUE	reported	bc9W8F
van_der_Harst_CAD	6	161005610	C	T	0.3122	0.0118	9.77237e-154	0.0693	547261	122733	rs55730499	424528	TRUE	reported	bc9W8F
van_der_Harst_CAD	6	161125454	T	C	-0.0915	0.0124	1.70687e-13	0.067	547261	122733	rs12212146	424528	TRUE	reported	bc9W8F
van_der_Harst_CAD	7	1937261	G	A	-0.036	0.0064	1.883e-08	0.2012	547261	122733	rs10267593	424528	TRUE	reported	bc9W8F
van_der_Harst_CAD	7	6487131	G	C	0.0386	0.0069	2.26298e-08	0.7681	547261	122733	rs4724806	424528	TRUE	reported	bc9W8F
van_der_Harst_CAD	7	19049388	G	A	0.0752	0.0073	1.25314e-24	0.1767	547261	122733	rs2107595	424528	TRUE	reported	bc9W8F
van_der_Harst_CAD	7	45077978	G	A	-0.0567	0.0103	3.63999e-08	0.0874	547261	122733	rs2107732	424528	TRUE	reported	bc9W8F
van_der_Harst_CAD	7	107230026	A	G	-0.0345	0.0063	4.53304e-08	0.7101	547261	122733	rs2189839	424528	TRUE	reported	bc9W8F
van_der_Harst_CAD	7	117332914	A	G	0.0283	0.0052	4.17004e-08	0.405	547261	122733	rs975722	424528	TRUE	reported	bc9W8F
van_der_Harst_CAD	7	129663496	C	T	-0.0548	0.0055	1.36804e-23	0.3624	547261	122733	rs11556924	424528	TRUE	reported	bc9W8F
van_der_Harst_CAD	7	139757136	G	T	-0.0338	0.0058	6.531e-09	0.3608	547261	122733	rs10237377	424528	TRUE	reported	bc9W8F
van_der_Harst_CAD	7	150690176	C	T	0.1071	0.0115	1.35301e-20	0.0732	547261	122733	rs3918226	424528	TRUE	reported	bc9W8F
van_der_Harst_CAD	8	19843171	T	C	-0.0585	0.0078	5.14991e-14	0.1291	547261	122733	rs17091891	424528	TRUE	reported	bc9W8F
van_der_Harst_CAD	8	22033615	C	G	0.0784	0.0115	1.044e-11	0.061	547261	122733	rs6984210	424528	TRUE	reported	bc9W8F
van_der_Harst_CAD	8	106565414	G	A	-0.0319	0.0057	1.882e-08	0.4167	547261	122733	rs10093110	424528	TRUE	reported	bc9W8F
van_der_Harst_CAD	8	126479362	C	T	-0.0498	0.0051	7.67008e-23	0.5298	547261	122733	rs6982502	424528	TRUE	reported	bc9W8F
van_der_Harst_CAD	9	22088094	A	G	0.1687	0.0054	1e-200	0.4853	547261	122733	rs10738607	424528	TRUE	reported	bc9W8F
van_der_Harst_CAD	9	110517794	C	T	-0.0395	0.0057	3.59087e-12	0.7197	547261	122733	rs944172	424528	TRUE	reported	bc9W8F
van_der_Harst_CAD	9	124420173	T	C	0.0355	0.0058	7.85905e-10	0.2696	547261	122733	rs885150	424528	TRUE	reported	bc9W8F
van_der_Harst_CAD	9	136154168	T	C	0.0506	0.0066	2.20496e-14	0.2048	547261	122733	rs579459	424528	TRUE	reported	bc9W8F
van_der_Harst_CAD	10	12303813	T	C	0.0363	0.0059	6.37705e-10	0.3645	547261	122733	rs61848342	424528	TRUE	reported	bc9W8F
van_der_Harst_CAD	10	30317073	G	A	0.0543	0.0064	1.72982e-17	0.3178	547261	122733	rs9337951	424528	TRUE	reported	bc9W8F
van_der_Harst_CAD	10	44480811	T	G	0.06	0.0059	3.50429e-24	0.6489	547261	122733	rs1870634	424528	TRUE	reported	bc9W8F
van_der_Harst_CAD	10	82251514	T	C	-0.042	0.0062	1.72385e-11	0.2848	547261	122733	rs17680741	424528	TRUE	reported	bc9W8F
van_der_Harst_CAD	10	91002927	C	T	0.0559	0.0059	2.43388e-21	0.3527	547261	122733	rs1412444	424528	TRUE	reported	bc9W8F
van_der_Harst_CAD	10	104638480	C	T	-0.0662	0.0084	4.66982e-15	0.1066	547261	122733	rs3740390	424528	TRUE	reported	bc9W8F
van_der_Harst_CAD	10	105693644	G	A	0.0386	0.0063	9.63208e-10	0.2713	547261	122733	rs4918072	424528	TRUE	reported	bc9W8F
van_der_Harst_CAD	10	124237612	A	G	0.0332	0.0051	8.01678e-11	0.4492	547261	122733	rs4752700	424528	TRUE	reported	bc9W8F
van_der_Harst_CAD	11	5701074	C	A	0.0782	0.0108	5.60919e-13	0.0739	547261	122733	rs11601507	424528	TRUE	reported	bc9W8F
van_der_Harst_CAD	11	13303085	A	G	0.0351	0.0061	9.41304e-09	0.6899	547261	122733	rs7926712	424528	TRUE	reported	bc9W8F
van_der_Harst_CAD	11	43696917	T	G	0.0314	0.0055	1.03001e-08	0.3123	547261	122733	rs7116641	424528	TRUE	reported	bc9W8F
van_der_Harst_CAD	11	65391317	G	A	-0.0403	0.006	2.29087e-11	0.2364	547261	122733	rs12801636	424528	TRUE	reported	bc9W8F
van_der_Harst_CAD	11	75276178	A	C	0.0466	0.0071	4.75773e-11	0.8293	547261	122733	rs606452	424528	TRUE	reported	bc9W8F
van_der_Harst_CAD	11	100624538	T	G	0.0377	0.0058	1.07999e-10	0.7154	547261	122733	rs607562	424528	TRUE	reported	bc9W8F
van_der_Harst_CAD	11	103660567	T	C	-0.0614	0.0055	1.11506e-28	0.6918	547261	122733	rs974819	424528	TRUE	reported	bc9W8F
van_der_Harst_CAD	11	116662579	C	T	-0.0692	0.0096	7.03234e-13	0.901	547261	122733	rs651821	424528	TRUE	reported	bc9W8F
van_der_Harst_CAD	12	7175872	T	C	-0.0514	0.0083	6.15205e-10	0.1321	547261	122733	rs11838267	424528	TRUE	reported	bc9W8F
van_der_Harst_CAD	12	20220033	C	G	0.046	0.0061	2.8622e-14	0.6591	547261	122733	rs10841443	424528	TRUE	reported	bc9W8F
van_der_Harst_CAD	12	54513915	C	G	0.0832	0.0117	9.27897e-13	0.0708	547261	122733	rs11170820	424528	TRUE	reported	bc9W8F
van_der_Harst_CAD	12	90013089	T	C	0.0558	0.0072	8.64371e-15	0.1859	547261	122733	rs2681492	424528	TRUE	reported	bc9W8F
van_der_Harst_CAD	12	95507971	G	A	-0.0747	0.0105	1.05609e-12	0.0768	547261	122733	rs11107903	424528	TRUE	reported	bc9W8F
van_der_Harst_CAD	12	111932800	C	T	-0.0643	0.006	3.71535e-27	0.5535	547261	122733	rs7137828	424528	TRUE	reported	bc9W8F
van_der_Harst_CAD	12	121416650	A	C	0.049	0.0056	1.26009e-18	0.3275	547261	122733	rs1169288	424528	TRUE	reported	bc9W8F
van_der_Harst_CAD	12	125316743	C	T	0.0619	0.0074	4.8217e-17	0.15	547261	122733	rs11057841	424528	TRUE	reported	bc9W8F
van_der_Harst_CAD	13	28973621	G	A	0.036	0.0055	5.3629e-11	0.3121	547261	122733	rs9319428	424528	TRUE	reported	bc9W8F
van_der_Harst_CAD	13	110920852	A	G	0.0635	0.0077	1.76807e-16	0.1261	547261	122733	rs12873154	424528	TRUE	reported	bc9W8F
van_der_Harst_CAD	13	111049623	T	C	-0.0596	0.006	3.89314e-23	0.2608	547261	122733	rs9515203	424528	TRUE	reported	bc9W8F
van_der_Harst_CAD	14	58794001	G	A	-0.0283	0.0052	4.26197e-08	0.5758	547261	122733	rs2145598	424528	TRUE	reported	bc9W8F
van_der_Harst_CAD	14	75583268	T	C	0.0319	0.0051	3.60097e-10	0.4766	547261	122733	rs7145159	424528	TRUE	reported	bc9W8F
van_der_Harst_CAD	14	100148961	T	C	0.0539	0.0066	2.8847e-16	0.7319	547261	122733	rs8003602	424528	TRUE	reported	bc9W8F
van_der_Harst_CAD	14	100350017	T	C	0.0408	0.0071	7.85091e-09	0.1905	547261	122733	rs3783324	424528	TRUE	reported	bc9W8F
van_der_Harst_CAD	15	65024204	G	A	0.0382	0.007	3.89502e-08	0.8117	547261	122733	rs6494488	424528	TRUE	reported	bc9W8F
van_der_Harst_CAD	15	67441750	C	A	-0.0576	0.0069	5.67545e-17	0.2211	547261	122733	rs72743461	424528	TRUE	reported	bc9W8F
van_der_Harst_CAD	15	79141784	T	C	-0.0636	0.0051	5.48151e-36	0.4458	547261	122733	rs7173743	424528	TRUE	reported	bc9W8F
van_der_Harst_CAD	15	89565257	A	C	-0.0639	0.0097	5.20595e-11	0.1109	547261	122733	rs1807214	424528	TRUE	reported	bc9W8F
van_der_Harst_CAD	15	91416550	C	A	0.0559	0.0052	9.86052e-27	0.4605	547261	122733	rs17514846	424528	TRUE	reported	bc9W8F
van_der_Harst_CAD	16	56993161	G	A	-0.0374	0.0062	1.19399e-09	0.3035	547261	122733	rs12149545	424528	TRUE	reported	bc9W8F
van_der_Harst_CAD	16	75303444	A	G	-0.0485	0.007	3.29306e-12	0.2411	547261	122733	rs7188857	424528	TRUE	reported	bc9W8F
van_der_Harst_CAD	16	81906423	A	G	-0.0367	0.0051	9.36268e-13	0.6018	547261	122733	rs7199941	424528	TRUE	reported	bc9W8F
van_der_Harst_CAD	16	83045790	A	G	-0.0557	0.0068	1.61213e-16	0.2406	547261	122733	rs7500448	424528	TRUE	reported	bc9W8F
van_der_Harst_CAD	17	2170216	C	T	-0.0469	0.0056	4.11244e-17	0.2943	547261	122733	rs170041	424528	TRUE	reported	bc9W8F
van_der_Harst_CAD	17	17543722	G	A	-0.032	0.0052	9.50692e-10	0.4379	547261	122733	rs12936587	424528	TRUE	reported	bc9W8F
van_der_Harst_CAD	17	27938424	T	C	0.0358	0.0057	2.90202e-10	0.4854	547261	122733	rs11080107	424528	TRUE	reported	bc9W8F
van_der_Harst_CAD	17	46970259	T	C	0.0409	0.0061	2.14092e-11	0.6877	547261	122733	rs1962412	424528	TRUE	reported	bc9W8F
van_der_Harst_CAD	17	47404628	G	T	0.048	0.006	1.63005e-15	0.3409	547261	122733	rs62076439	424528	TRUE	reported	bc9W8F
van_der_Harst_CAD	17	59109285	C	T	0.0427	0.0078	4.05005e-08	0.1811	547261	122733	rs7206935	424528	TRUE	reported	bc9W8F
van_der_Harst_CAD	17	62401965	T	C	0.033	0.005	6.27914e-11	0.5283	547261	122733	rs9892152	424528	TRUE	reported	bc9W8F
van_der_Harst_CAD	18	47229717	A	C	0.0382	0.0063	1.136e-09	0.284	547261	122733	rs9964304	424528	TRUE	reported	bc9W8F
van_der_Harst_CAD	18	57846077	C	T	0.0383	0.0068	2.01799e-08	0.222	547261	122733	rs663640	424528	TRUE	reported	bc9W8F
van_der_Harst_CAD	19	11188153	A	C	-0.1157	0.0092	1.93108e-36	0.1132	547261	122733	rs55791371	424528	TRUE	reported	bc9W8F
van_der_Harst_CAD	19	11293642	G	A	0.0568	0.0098	6.01201e-09	0.0769	547261	122733	rs17616620	424528	TRUE	reported	bc9W8F
van_der_Harst_CAD	19	17844942	G	T	0.0511	0.0069	1.43814e-13	0.2162	547261	122733	rs7251815	424528	TRUE	reported	bc9W8F
van_der_Harst_CAD	19	41742308	G	A	-0.0413	0.0075	3.323e-08	0.177	547261	122733	rs7256873	424528	TRUE	reported	bc9W8F
van_der_Harst_CAD	19	41851509	C	A	-0.0484	0.0057	2.36211e-17	0.4954	547261	122733	rs4803455	424528	TRUE	reported	bc9W8F
van_der_Harst_CAD	19	45412079	C	T	-0.1368	0.011	2.13501e-35	0.079	547261	122733	rs7412	424528	TRUE	reported	bc9W8F
van_der_Harst_CAD	19	45742094	G	A	0.0429	0.0065	5.21795e-11	0.2574	547261	122733	rs11673093	424528	TRUE	reported	bc9W8F
van_der_Harst_CAD	20	33764554	A	G	-0.0573	0.0084	6.84069e-12	0.1029	547261	122733	rs867186	424528	TRUE	reported	bc9W8F
van_der_Harst_CAD	20	44586023	C	T	0.0424	0.0072	4.39602e-09	0.1437	547261	122733	rs3827066	424528	TRUE	reported	bc9W8F
van_der_Harst_CAD	20	57714025	C	T	0.0518	0.0084	7.95994e-10	0.1309	547261	122733	rs260020	424528	TRUE	reported	bc9W8F
van_der_Harst_CAD	21	35593827	G	A	0.1083	0.009	2.57929e-33	0.1239	547261	122733	rs28451064	424528	TRUE	reported	bc9W8F
van_der_Harst_CAD	22	24672718	A	G	-0.1063	0.018	3.73001e-09	0.0272	547261	122733	rs62233066	424528	TRUE	reported	bc9W8F
van_der_Harst_CAD	22	40943032	A	G	-0.0351	0.0064	4.39602e-08	0.7228	547261	122733	rs6001960	424528	TRUE	reported	bc9W8F

## Sheet: sup tab5. Instrument strenght
outcome	exposure	method	Q	Q_df	Q_pval	fstat	rsq
Mahajan_Type2diabetes	BMI_UKB	MR Egger	1743.74	452	9.59935e-151	67.4586	0.0624238
Mahajan_Type2diabetes	BMI_UKB	Inverse variance weighted	1746.53	453	6.70407e-151	67.4586	0.0624238
NAFLD	BMI_UKB	MR Egger	569.804	448	8.11277e-05	67.5754	0.0620091
NAFLD	BMI_UKB	Inverse variance weighted	570.003	449	9.01527e-05	67.5754	0.0620091
Nikpay_CAD	BMI_UKB	MR Egger	692.804	451	1.65528e-12	67.3326	0.0620573
Nikpay_CAD	BMI_UKB	Inverse variance weighted	694.401	452	1.55029e-12	67.3326	0.0620573
Scott_Type2Diabetes	BMI_UKB	MR Egger	842.928	453	7.8916e-26	67.386	0.0624895
Scott_Type2Diabetes	BMI_UKB	Inverse variance weighted	850.316	454	1.91109e-26	67.386	0.0624895
van_der_Harst_CAD	BMI_UKB	MR Egger	1218.33	452	1.2803e-71	67.3885	0.0622344
van_der_Harst_CAD	BMI_UKB	Inverse variance weighted	1225.11	453	2.47275e-72	67.3885	0.0622344
Mahajan_Type2diabetes	GIANT_2015_BMI	MR Egger	2603.03	66	0	67.6085	0.0145846
Mahajan_Type2diabetes	GIANT_2015_BMI	Inverse variance weighted	2645.31	67	0	67.6085	0.0145846
NAFLD	GIANT_2015_BMI	MR Egger	105.465	66	0.00145991	67.6085	0.0145846
NAFLD	GIANT_2015_BMI	Inverse variance weighted	105.557	67	0.00185645	67.6085	0.0145846
Nikpay_CAD	GIANT_2015_BMI	MR Egger	108.739	66	0.000727291	67.6085	0.0145846
Nikpay_CAD	GIANT_2015_BMI	Inverse variance weighted	108.869	67	0.000929667	67.6085	0.0145846
Scott_Type2Diabetes	GIANT_2015_BMI	MR Egger	712.913	66	3.00389e-109	67.6085	0.0145846
Scott_Type2Diabetes	GIANT_2015_BMI	Inverse variance weighted	734.295	67	5.88084e-113	67.6085	0.0145846
van_der_Harst_CAD	GIANT_2015_BMI	MR Egger	187.596	66	1.35486e-13	67.6085	0.0145846
van_der_Harst_CAD	GIANT_2015_BMI	Inverse variance weighted	191.592	67	6.15188e-14	67.6085	0.0145846
Mahajan_Type2diabetes	GIANT_2015_WC	MR Egger	2453.69	39	0	60.4458	0.010713
Mahajan_Type2diabetes	GIANT_2015_WC	Inverse variance weighted	2620.89	40	0	60.4458	0.010713
NAFLD	GIANT_2015_WC	MR Egger	57.7451	39	0.0269735	60.4458	0.010713
NAFLD	GIANT_2015_WC	Inverse variance weighted	57.7507	40	0.0342569	60.4458	0.010713
Nikpay_CAD	GIANT_2015_WC	MR Egger	98.2285	39	5.15189e-07	60.4458	0.010713
Nikpay_CAD	GIANT_2015_WC	Inverse variance weighted	101.227	40	3.24863e-07	60.4458	0.010713
Scott_Type2Diabetes	GIANT_2015_WC	MR Egger	618.098	39	2.69853e-105	60.4458	0.010713
Scott_Type2Diabetes	GIANT_2015_WC	Inverse variance weighted	682.497	40	7.3394e-118	60.4458	0.010713
van_der_Harst_CAD	GIANT_2015_WC	MR Egger	171.973	39	1.27116e-18	60.4458	0.010713
van_der_Harst_CAD	GIANT_2015_WC	Inverse variance weighted	172.201	40	2.47442e-18	60.4458	0.010713
BMI_UKB	Mahajan_Type2diabetes	MR Egger	6024.89	201	0	75.8829	0.016866
BMI_UKB	Mahajan_Type2diabetes	Inverse variance weighted	6504.69	202	0	75.8829	0.016866
GIANT_2015_BMI	Mahajan_Type2diabetes	MR Egger	2239.52	179	0	77.4097	0.0153638
GIANT_2015_BMI	Mahajan_Type2diabetes	Inverse variance weighted	2397.08	180	0	77.4097	0.0153638
GIANT_2015_WC	Mahajan_Type2diabetes	MR Egger	1530.56	178	1.60098e-213	77.6336	0.0153237
GIANT_2015_WC	Mahajan_Type2diabetes	Inverse variance weighted	1626.4	179	1.55407e-231	77.6336	0.0153237
NAFLD	Mahajan_Type2diabetes	MR Egger	429.597	200	7.59475e-19	75.661	0.016736
NAFLD	Mahajan_Type2diabetes	Inverse variance weighted	436.668	201	1.6332e-19	75.661	0.016736
Nikpay_CAD	Mahajan_Type2diabetes	MR Egger	480.606	201	6.07823e-25	75.8829	0.016866
Nikpay_CAD	Mahajan_Type2diabetes	Inverse variance weighted	507.394	202	3.14863e-28	75.8829	0.016866
Scott_Type2Diabetes	Mahajan_Type2diabetes	MR Egger	234.233	201	0.0540383	75.8829	0.016866
Scott_Type2Diabetes	Mahajan_Type2diabetes	Inverse variance weighted	234.239	202	0.0595508	75.8829	0.016866
van_der_Harst_CAD	Mahajan_Type2diabetes	MR Egger	1182.47	201	1.34797e-138	75.8829	0.016866
van_der_Harst_CAD	Mahajan_Type2diabetes	Inverse variance weighted	1227.27	202	2.51007e-146	75.8829	0.016866
WC_UKB	Mahajan_Type2diabetes	MR Egger	4680.45	201	0	75.8829	0.016866
WC_UKB	Mahajan_Type2diabetes	Inverse variance weighted	5036.43	202	0	75.8829	0.016866
BMI_UKB	NAFLD	MR Egger	133.872	2	8.51215e-30	90.8946	0.000466741
BMI_UKB	NAFLD	Inverse variance weighted	135.496	3	3.53593e-29	90.8946	0.000466741
GIANT_2015_BMI	NAFLD	MR Egger	27.7783	1	1.36041e-07	96.4687	0.000371558
GIANT_2015_BMI	NAFLD	Inverse variance weighted	28.0447	2	8.13149e-07	96.4687	0.000371558
GIANT_2015_WC	NAFLD	MR Egger	25.6779	1	4.03427e-07	96.4687	0.000371558
GIANT_2015_WC	NAFLD	Inverse variance weighted	27.9779	2	8.4078e-07	96.4687	0.000371558
Mahajan_Type2diabetes	NAFLD	MR Egger	55.548	2	8.66778e-13	90.8946	0.000466741
Mahajan_Type2diabetes	NAFLD	Inverse variance weighted	56.1184	3	3.96342e-12	90.8946	0.000466741
Nikpay_CAD	NAFLD	MR Egger	57.7708	2	2.85259e-13	90.8946	0.000466741
Nikpay_CAD	NAFLD	Inverse variance weighted	65.77	3	3.43275e-14	90.8946	0.000466741
Scott_Type2Diabetes	NAFLD	MR Egger	25.9865	2	2.27567e-06	90.8946	0.000466741
Scott_Type2Diabetes	NAFLD	Inverse variance weighted	26.1535	3	8.85704e-06	90.8946	0.000466741
van_der_Harst_CAD	NAFLD	MR Egger	187.785	2	1.6715e-41	90.8946	0.000466741
van_der_Harst_CAD	NAFLD	Inverse variance weighted	212.623	3	7.89383e-46	90.8946	0.000466741
WC_UKB	NAFLD	MR Egger	121.43	2	4.28371e-27	90.8946	0.000466741
WC_UKB	NAFLD	Inverse variance weighted	127.37	3	1.99425e-27	90.8946	0.000466741
BMI_UKB	Nikpay_CAD	MR Egger	798.822	39	1.74601e-142	61.376	0.0134727
BMI_UKB	Nikpay_CAD	Inverse variance weighted	827.571	40	8.89647e-148	61.376	0.0134727
GIANT_2015_BMI	Nikpay_CAD	MR Egger	342.301	35	4.28652e-52	62.4128	0.0123771
GIANT_2015_BMI	Nikpay_CAD	Inverse variance weighted	358.696	36	8.22226e-55	62.4128	0.0123771
GIANT_2015_WC	Nikpay_CAD	MR Egger	200.724	35	3.83314e-25	62.4128	0.0123771
GIANT_2015_WC	Nikpay_CAD	Inverse variance weighted	208.595	36	3.46829e-26	62.4128	0.0123771
Mahajan_Type2diabetes	Nikpay_CAD	MR Egger	279.624	39	3.90181e-38	61.376	0.0134727
Mahajan_Type2diabetes	Nikpay_CAD	Inverse variance weighted	279.64	40	1.04851e-37	61.376	0.0134727
NAFLD	Nikpay_CAD	MR Egger	48.3317	39	0.145343	61.376	0.0134727
NAFLD	Nikpay_CAD	Inverse variance weighted	49.4387	40	0.145628	61.376	0.0134727
Scott_Type2Diabetes	Nikpay_CAD	MR Egger	152.067	39	2.84216e-15	61.376	0.0134727
Scott_Type2Diabetes	Nikpay_CAD	Inverse variance weighted	152.809	40	4.3036e-15	61.376	0.0134727
van_der_Harst_CAD	Nikpay_CAD	MR Egger	120.471	39	3.01628e-10	61.376	0.0134727
van_der_Harst_CAD	Nikpay_CAD	Inverse variance weighted	155.399	40	1.61363e-15	61.376	0.0134727
WC_UKB	Nikpay_CAD	MR Egger	694.114	39	7.13245e-121	61.376	0.0134727
WC_UKB	Nikpay_CAD	Inverse variance weighted	709.716	40	1.89162e-123	61.376	0.0134727
BMI_UKB	Scott_Type2Diabetes	MR Egger	1838.49	38	0	62.1546	0.0153797
BMI_UKB	Scott_Type2Diabetes	Inverse variance weighted	1840.58	39	0	62.1546	0.0153797
GIANT_2015_BMI	Scott_Type2Diabetes	MR Egger	959.08	35	1.13368e-178	64.3371	0.0147352
GIANT_2015_BMI	Scott_Type2Diabetes	Inverse variance weighted	959.087	36	5.96317e-178	64.3371	0.0147352
GIANT_2015_WC	Scott_Type2Diabetes	MR Egger	658.647	35	4.04602e-116	64.3371	0.0147352
GIANT_2015_WC	Scott_Type2Diabetes	Inverse variance weighted	659.263	36	1.32187e-115	64.3371	0.0147352
Mahajan_Type2diabetes	Scott_Type2Diabetes	MR Egger	188.378	38	8.1417e-22	62.1546	0.0153797
Mahajan_Type2diabetes	Scott_Type2Diabetes	Inverse variance weighted	237.349	39	2.92398e-30	62.1546	0.0153797
NAFLD	Scott_Type2Diabetes	MR Egger	95.5078	38	7.48294e-07	62.1546	0.0153797
NAFLD	Scott_Type2Diabetes	Inverse variance weighted	96.3504	39	9.31907e-07	62.1546	0.0153797
Nikpay_CAD	Scott_Type2Diabetes	MR Egger	179.423	38	3.01695e-20	62.1546	0.0153797
Nikpay_CAD	Scott_Type2Diabetes	Inverse variance weighted	179.431	39	6.62109e-20	62.1546	0.0153797
van_der_Harst_CAD	Scott_Type2Diabetes	MR Egger	639.646	38	2.56922e-110	62.1546	0.0153797
van_der_Harst_CAD	Scott_Type2Diabetes	Inverse variance weighted	643.461	39	1.76061e-110	62.1546	0.0153797
WC_UKB	Scott_Type2Diabetes	MR Egger	1387.75	38	1.00602e-266	62.1546	0.0153797
WC_UKB	Scott_Type2Diabetes	Inverse variance weighted	1395.53	39	1.38755e-267	62.1546	0.0153797
BMI_UKB	van_der_Harst_CAD	MR Egger	1686.4	142	3.77861e-262	73.9162	0.0190833
BMI_UKB	van_der_Harst_CAD	Inverse variance weighted	1761.14	143	1.63053e-276	73.9162	0.0190833
GIANT_2015_BMI	van_der_Harst_CAD	MR Egger	622.874	132	9.9689e-65	72.3644	0.0174146
GIANT_2015_BMI	van_der_Harst_CAD	Inverse variance weighted	638.662	133	4.15093e-67	72.3644	0.0174146
GIANT_2015_WC	van_der_Harst_CAD	MR Egger	405.847	132	1.2531e-29	72.3644	0.0174146
GIANT_2015_WC	van_der_Harst_CAD	Inverse variance weighted	417.518	133	4.08056e-31	72.3644	0.0174146
Mahajan_Type2diabetes	van_der_Harst_CAD	MR Egger	885.114	142	1.03259e-107	73.9162	0.0190833
Mahajan_Type2diabetes	van_der_Harst_CAD	Inverse variance weighted	930.978	143	9.91245e-116	73.9162	0.0190833
NAFLD	van_der_Harst_CAD	MR Egger	161.552	141	0.113481	74.1546	0.0190133
NAFLD	van_der_Harst_CAD	Inverse variance weighted	164.023	142	0.0995919	74.1546	0.0190133
Nikpay_CAD	van_der_Harst_CAD	MR Egger	106.311	142	0.988882	73.9162	0.0190833
Nikpay_CAD	van_der_Harst_CAD	Inverse variance weighted	107.628	143	0.987899	73.9162	0.0190833
Scott_Type2Diabetes	van_der_Harst_CAD	MR Egger	416.992	142	7.68958e-29	73.9162	0.0190833
Scott_Type2Diabetes	van_der_Harst_CAD	Inverse variance weighted	432.003	143	8.66793e-31	73.9162	0.0190833
WC_UKB	van_der_Harst_CAD	MR Egger	1323.59	142	1.0163e-190	73.9162	0.0190833
WC_UKB	van_der_Harst_CAD	Inverse variance weighted	1397.99	143	1.01821e-204	73.9162	0.0190833
Mahajan_Type2diabetes	WC_UKB	MR Egger	2190.46	372	1.3204e-254	59.687	0.0462286
Mahajan_Type2diabetes	WC_UKB	Inverse variance weighted	2190.59	373	3.04159e-254	59.687	0.0462286
NAFLD	WC_UKB	MR Egger	456.847	369	0.00121545	59.831	0.045981
NAFLD	WC_UKB	Inverse variance weighted	457.139	370	0.00132512	59.831	0.045981
Nikpay_CAD	WC_UKB	MR Egger	576.751	370	3.01219e-11	59.7066	0.0460076
Nikpay_CAD	WC_UKB	Inverse variance weighted	578.221	371	2.88744e-11	59.7066	0.0460076
Scott_Type2Diabetes	WC_UKB	MR Egger	872.34	372	3.41498e-42	59.687	0.0462286
Scott_Type2Diabetes	WC_UKB	Inverse variance weighted	872.397	373	5.15698e-42	59.687	0.0462286
van_der_Harst_CAD	WC_UKB	MR Egger	1058.34	371	2.46853e-67	59.6939	0.046116
van_der_Harst_CAD	WC_UKB	Inverse variance weighted	1059.24	372	3.10914e-67	59.6939	0.046116
